# Supplementary material for: Three-component coupling reaction of white phosphorus, alcohols and diaryl disulfides: a chlorine-free avenue for accessing phosphorothioates
Source: Royal Society of Chemistry journal article supplement (doi:10.1039/d3gc03583b), 2023-12-01

## Electronic Supplementary Information

for

### Three-component coupling reaction of white phosphorus, alcohols and diaryl disulfides: A chlorine-free avenue for accessing phosphorothioates

Yinwei Cao, Mengpei Bai, Junwei Huang, Fushan Chen,\* Yan Liu, Guo Tang,\* and Yufen Zhao

Department of Chemistry, College of Chemistry and Chemical Engineering, and the Key Laboratory for Chemical Biology of Fujian Province, Xiamen University, Xiamen, Fujian 361005, China.

E-mail: [17706925334@163.com](mailto:17706925334@163.com); [t12g21@xmu.edu.cn](mailto:t12g21@xmu.edu.cn)

### Table of Contents

|          |                                                                                                    |            |
|----------|----------------------------------------------------------------------------------------------------|------------|
| <b>1</b> | <b>General information</b>                                                                         | <b>S1</b>  |
| <b>2</b> | <b>Tables for optimization of the reaction conditions</b>                                          | <b>S3</b>  |
| <b>3</b> | <b>General experimental procedures</b>                                                             | <b>S8</b>  |
| <b>4</b> | <b>Control experiments and proposed reaction mechanism for the synthesis of phosphorothioates</b>  | <b>S8</b>  |
| <b>5</b> | <b>Control experiments and proposed reaction mechanism for the synthesis of mixed phosphonates</b> | <b>S14</b> |
| <b>6</b> | <b>Characterization for products</b>                                                               | <b>S17</b> |
| <b>7</b> | <b>Supplementary reference</b>                                                                     | <b>S30</b> |
| <b>8</b> | <b>NMR spectrum of isolated products</b>                                                           | <b>S31</b> |

## 1. General information.

All reactions were carried out under dry air (unless otherwise noted). All glassware was oven-dried prior to use. The commercially available reagents were purchased from TCI, Energy Chemical and Bide Pharmatech Ltd and used without further purification. Some disulfides were prepared according to literature references.<sup>1,2</sup> Toluene, *N, N*-dimethylformamide, dimethyl sulfoxide, tetrahydrofuran, acetonitrile and dichloroethane were purchased from Sinopharm Chemical Reagent Co., Ltd and used as the solvent. petroleum ether and ethyl acetate are all AR grade were obtained commercially and used as eluent without further purification. <sup>1</sup>H, <sup>13</sup>C, <sup>31</sup>P, <sup>19</sup>F and spectra were measured on Bruker AV 600M, 500M or 400M spectrometers with CDCl<sub>3</sub> as solvent. Data were reported relative to solvent peaks CDCl<sub>3</sub> (7.26 ppm) for <sup>1</sup>H NMR and CDCl<sub>3</sub> (77.26 ppm) for <sup>13</sup>C NMR. 85% H<sub>3</sub>PO<sub>4</sub> as external standard for <sup>31</sup>P{<sup>1</sup>H} NMR spectra, <sup>19</sup>F{<sup>1</sup>H} chemical shifts were uncalibrated. Data are represented as follows: chemical shift, multiplicity (s = singlet, d = doublet, t = triplet, q = quartet, m = multiplet, dd = doublet of doublets, dt = doublet of triplets, br = broad), coupling constants in Hertz (Hz). The products were purified by column chromatography on silica gel 300-400 mesh. The CAS number of the known compound was listed. All products were further characterized by HRMS (FT-ICR-MS) and an electrospray ionization source in positive-ion mode.

**Preparation of P<sub>4</sub>-toluene solution** A piece of white phosphorus was taken out of water and then put in acetone under argon. One minute later, white phosphorus was taken out and the surface acetone was blown dry with argon. Then, the dry white phosphorus was put in a conical flask containing toluene. The mixture was stirred intensely with a magnetic stirrer for overnight. White phosphorus-toluene solution prepared with 0.125 mol/L (15.5 g/L, determined by <sup>31</sup>P NMR analysis of the solution using Ph<sub>3</sub>P(O) as an internal standard. D1 = 20 s, zg30, LB = 1).

**Safety note for P<sub>4</sub>:** White phosphorus is spontaneously flammable; it should be stored in water or glove box. White phosphorus-toluene solution should be sealed in argon and stored away from light.

## 2. Tables for optimization of the reaction conditions

The yield of product was determined by  $^{31}\text{P}\{^1\text{H}\}$  NMR analysis of the crude reaction mixture using  $(\text{C}_6\text{H}_5\text{O})_3\text{P}(\text{O})$  as an internal standard.

Supplementary Table 1-1 Screening of bases.<sup>[a]</sup>

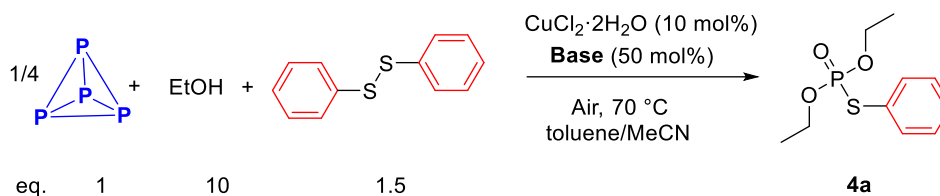

| Entry | Base                     | Yield of <b>4a</b> <sup>[b]</sup> |
|-------|--------------------------|-----------------------------------|
| 1     | $\text{K}_2\text{CO}_3$  | 6%                                |
| 2     | $\text{K}_3\text{PO}_4$  | Tarce                             |
| 3     | $\text{Na}_2\text{CO}_3$ | n.d                               |
| 4     | $\text{Cs}_2\text{CO}_3$ | 28%                               |
| 5     | KOH                      | n.d                               |
| 6     | $\text{NaHCO}_3$         | n.d                               |
| 7     | <i>t</i> -BuONa          | 10%                               |
| 8     | TEA                      | 6%                                |
| 9     | DIPEA                    | 5%                                |
| 10    | $\text{Et}_2\text{NH}$   | 7%                                |
| 11    | DABCO                    | 15%                               |
| 12    | TMEDA                    | 8%                                |
| 13    | DBU                      | 46%                               |

[a] Standard conditions (unless otherwise specified):  $\text{P}_4$  (6.20 mg, 0.20 mmol of P atom, 0.125 M solution of  $\text{P}_4$  in toluene, 0.40 mL), ethanol (2.00 mmol, 10.0 eq.), diphenyl disulfide (0.30 mmol, 1.5 eq.),  $\text{CuCl}_2 \cdot \text{H}_2\text{O}$  (0.02 mmol,) **base (0.10 mmol, 50 mol %)** in solvent (acetonitrile, 2.00 mL), react at 70 °C (oil bath) for 16 h under an air atmosphere [b] Yield of product was determined by  $^{31}\text{P}\{^1\text{H}\}$  NMR analysis of the crude reaction mixture using  $(\text{C}_6\text{H}_5\text{O})_3\text{P}(\text{O})$  as an internal standard. TEA = Triethylamine, DIPEA = *N,N*-Diisopropylethylamine, DABCO = Triethylenediamine, TMEDA = Tetramethylenediamine, DBU = 1,8-Diazabicyclo[5.4.0]undecane-7-ene.

Supplementary Table 1-2 Screening of copper salt.<sup>[a]</sup>

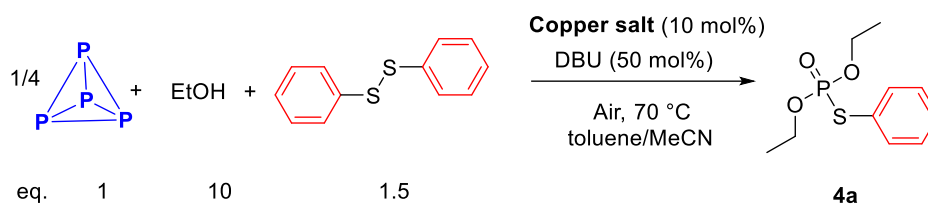

| Entry | Copper salt                                         | Yield of <b>4a</b> <sup>[b]</sup> |
|-------|-----------------------------------------------------|-----------------------------------|
| 1     | Cu(OAc) <sub>2</sub>                                | 26%                               |
| 2     | CuI                                                 | 37%                               |
| 3     | Cu(OTf) <sub>2</sub>                                | 18%                               |
| 4     | CuCl                                                | 37%                               |
| 5     | Cu(CH <sub>3</sub> CN) <sub>4</sub> PF <sub>6</sub> | 41%                               |
| 6     | Cu(CH <sub>3</sub> CN) <sub>4</sub> BF <sub>4</sub> | 58%                               |
| 7     | Cu(acac) <sub>2</sub>                               | 70%                               |
| 8     | CuBr                                                | 18%                               |
| 9     | Cu(TFA) <sub>2</sub>                                | 45%                               |
| 10    | CuSO <sub>4</sub> ·5H <sub>2</sub> O                | 65%                               |

[a] Standard conditions (unless otherwise specified): P<sub>4</sub> (6.20 mg, 0.20 mmol of P atom, 0.125 M solution of P<sub>4</sub> in toluene, 0.40 mL), ethanol (2.00 mmol, 10.0 eq.), diphenyl disulfide (0.30 mmol, 1.5 eq.), DBU (0.10 mmol, 50 mol %) and **copper salt (0.02 mmol)** in solvent (acetonitrile, 2.00 mL), react at 70 °C (oil bath) for 16 h under an air atmosphere [b] Yield of product was determined by <sup>31</sup>P{<sup>1</sup>H} NMR analysis of the crude reaction mixture using (C<sub>6</sub>H<sub>5</sub>O)<sub>3</sub>P(O) as an internal standard. Cu(OAc)<sub>2</sub> = Copper(II) acetate, Cu(OTf)<sub>2</sub> = Copper(II) trifluoromethanesulfonate, Cu(acac)<sub>2</sub> = Cupric acetylacetonate, Cu(TFA)<sub>2</sub> = Copper (II) trifluoroacetate



**Supplementary Table 1-3** Screening of solvent.<sup>[a]</sup>

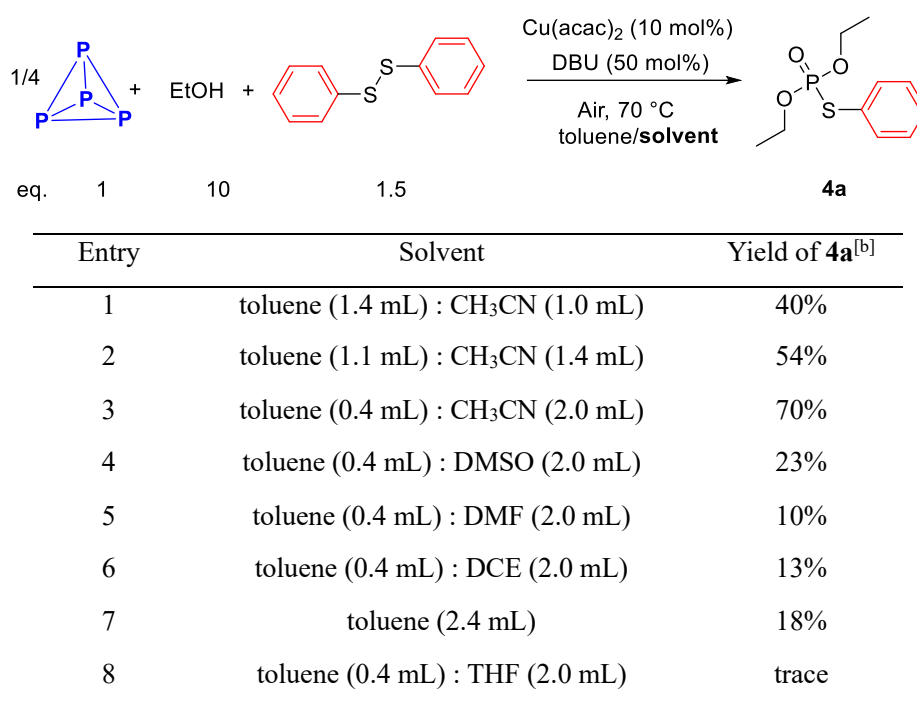

[a] Standard conditions (unless otherwise specified):  $P_4$  (6.20 mg, 0.30 mmol of P atom, a 0.125 M solution of  $P_4$  in toluene, 0.40 mL), ethanol (2.00 mmol, 10.0 eq.), diphenyl disulfide (0.30 mmol, 1.5 eq.), DBU (0.10 mmol, 50 mol %) and  $Cu(acac)_2$  (0.02 mmol) in solvent (2.00 mL), react at 70 °C (oil bath) for 16 h under an air atmosphere  
 [b] Yield of product was determined by  $^{31}P\{^1H\}$  NMR analysis of the crude reaction mixture using  $(C_6H_5O)_3P(O)$  as an internal standard. DMSO = Dimethyl sulfoxide, DMF = N,N-Dimethylformamide, DCE = 1,2-Dichloroethane, THF = Tetrahydrofuran.

**Supplementary Table 1-4** Screening of reaction temperature.<sup>[a]</sup>

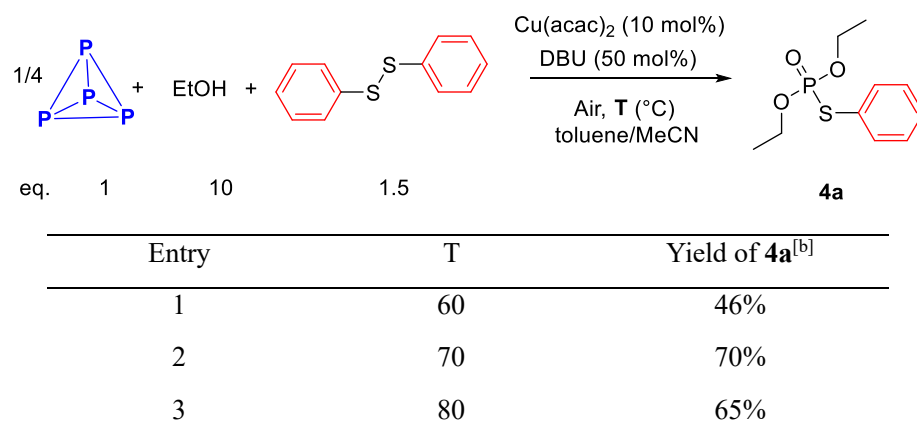

[a] Standard conditions (unless otherwise specified):  $P_4$  (6.20 mg, 0.20 mmol of P atom, a 0.125 M solution of  $P_4$  in toluene, 0.40 mL), ethanol (2.00 mmol, 10.0 eq.), diphenyl disulfide (0.30 mmol, 1.5 eq.), DBU (0.10 mmol, 50 mol %) and  $Cu(acac)_2$  (0.02 mmol) in  $CH_3CN$  (2.00 mL), react at T °C (oil bath) for 16 h under an air atmosphere  
 [b] Yield of product was determined by  $^{31}P\{^1H\}$  NMR analysis of the crude reaction mixture using  $(C_6H_5O)_3P(O)$  as an internal standard.

**Supplementary Table 1-5 Screening of other organic bases.**<sup>[a]</sup>

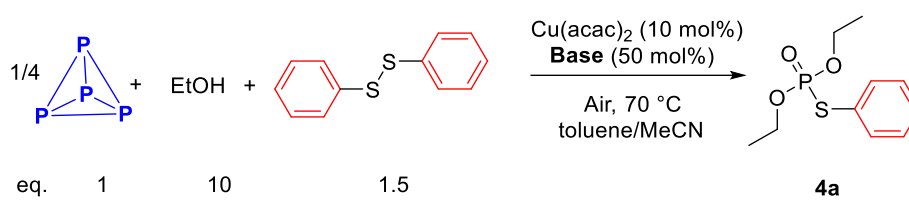

| Entry | Base | Yield of <b>4a</b> <sup>[b]</sup> |
|-------|------|-----------------------------------|
| 1     | TMG  | 37%                               |
| 2     | DBN  | 80%                               |
| 3     | MTBD | 80%                               |
| 4     | TBD  | 94%                               |

[a] Standard conditions (unless otherwise specified):  $\text{P}_4$  (6.20 mg, 0.20 mmol of P atom, 0.125 M solution of  $\text{P}_4$  in toluene, 0.40 mL), ethanol (2.00 mmol, 10.0 eq.), diphenyl disulfide (0.30 mmol, 1.5 eq.),  $\text{Cu}(\text{acac})_2$  (0.02 mmol, **base (0.10 mmol, 50 mol %)**) in  $\text{CH}_3\text{CN}$  (2.00 mL), react at 70 °C (oil bath) for 16 h under an air atmosphere [b] Yield of product was determined by  $^{31}\text{P}\{^1\text{H}\}$  NMR analysis of the crude reaction mixture using  $(\text{C}_6\text{H}_5\text{O})_3\text{P}(\text{O})$  as an internal standard. TMG = Tetramethylguanidine, DBN = 1,5-Diazabicyclo[4.3.0]non-5-ene, MTBD = 1,3,4,6,7,8-hexahydro-1-methyl-2h-pyrimidol[1,2-a]pyrimidine, TBD = 1,5,7-Triazabicyclo[4.4.0]dec-5-ene.

**Supplementary Table 1-6 Screening of loading amount of disulfide and alcohol.**<sup>[a]</sup>

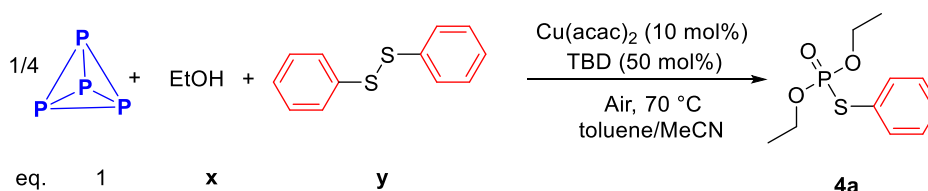

| Entry | x : y   | Yield of <b>4a</b> <sup>[b]</sup> |
|-------|---------|-----------------------------------|
| 1     | 10:0.5  | 44%                               |
| 2     | 10:1.0  | 74%                               |
| 3     | 10:1.5  | 94%                               |
| 3     | 7.5:1.5 | 74%                               |
| 4     | 5.0:1.5 | 50%                               |

[a] Standard conditions (unless otherwise specified):  $\text{P}_4$  (6.20 mg, 0.20 mmol of P atom, a 0.125 M solution of  $\text{P}_4$  in toluene, 0.40 mL), ethanol (x eq.), diphenyl disulfide (y eq.), TBD (0.10 mmol, 50 mol %) and  $\text{Cu}(\text{acac})_2$  (0.02 mmol) in solvent (2.00 mL), react at 70 °C (oil bath) for 16 h under an air atmosphere [b] Yield of product was determined by  $^{31}\text{P}\{^1\text{H}\}$  NMR analysis of the crude reaction mixture using  $(\text{C}_6\text{H}_5\text{O})_3\text{P}(\text{O})$  as an internal standard.

**Supplementary Table 1-7 Investigation of other metal salts<sup>[a]</sup>**

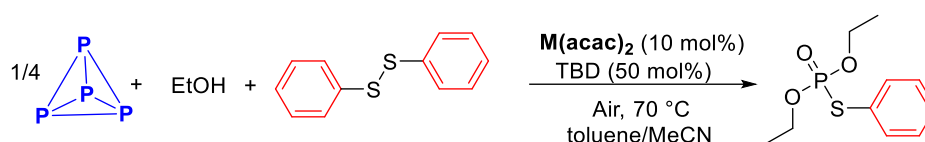

| eq.   | 1 | 10 | 1.5 |                                   |     |
|-------|---|----|-----|-----------------------------------|-----|
| Entry |   |    |     | M                                 |     |
|       |   |    |     | Yield of <b>4a</b> <sup>[b]</sup> |     |
|       | 1 |    |     | Fe                                | 20% |
|       | 2 |    |     | Co                                | 13% |
|       | 3 |    |     | Ni                                | 17% |

[a] Standard conditions (unless otherwise specified):  $P_4$  (6.20 mg, 0.20 mmol of P atom, a 0.125M solution of  $P_4$  in toluene, 0.40 mL), ethanol (2.00 mmol, 10.0 eq.), diphenyl disulfide (0.30 mmol, 1.5 eq.), TBD (0.10 mmol, 50 mol %) and metal salt (0.02 mmol) in  $CH_3CN$  (2.00 mL), react at 70 °C (oil bath) for 16 h under an air atmosphere

[b] Yield of product was determined by  $^{31}P\{^1H\}$  NMR analysis of the crude reaction mixture using  $(C_6H_5O)_3P(O)$  as an internal standard.

**Supplementary Table 1-8 Optimization of the reaction conditions for substrates bearing the strong electron-withdrawing group<sup>[a]</sup>**

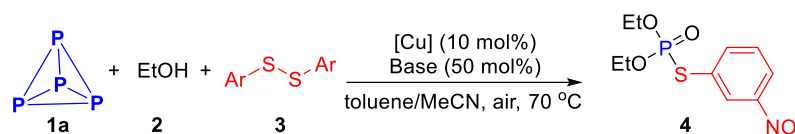

| Entry | deviation                 | Yield |
|-------|---------------------------|-------|
| 1     | [Cu] 50 mol%              | 17%   |
| 2     | TBD 1 eq.                 | 31%   |
| 3     | [Cu]50 mol% and TBD 1 eq. | 22%   |
| 4     | <b>3</b> 2 eq.            | 45%   |
| 5     | <b>3</b> 3 eq.            | 51%   |
| 6     | <b>3</b> 4 eq.            | 58%   |
| 7     | $CuCl_2$                  | 24%   |
| 8     | $Cu(OAc)_2$               | 20%   |
| 9     | $CuSO_4$                  | 27%   |
| 10    | MTBD                      | 40%   |
| 11    | DBN                       | 31%   |
| 12    | 80 °C                     | 28%   |

[a] Standard conditions (unless otherwise specified):  $P_4$  (6.20 mg, 0.20 mmol of P atom, a 0.125 M solution of  $P_4$  in toluene, 0.40 mL), ethanol (2.00 mmol, 10.0 eq.), diphenyl disulfide (0.30 mmol, 1.5 eq.), Base (0.10 mmol, 50 mol %) and metal salt (0.02 mmol) in solvent (2.00 mL), react at 70 °C (oil bath) for 16 h under an air atmosphere

[b] Yield of product was determined by  $^{31}P\{^1H\}$  NMR analysis of the crude reaction mixture using  $(C_6H_5O)_3P(O)$  as an internal standard.

### 3. General experimental procedures

#### General procedure 1: Synthesis of phosphorothioates (4a-5l)

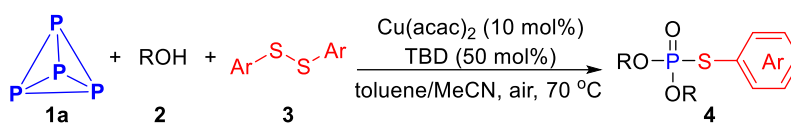

#### Supplementary Scheme 1-1

To an oven-dried schlenk tube with a magnetic stir bar was added  $\text{Cu(acac)}_2$  (0.02 mmol, 5.3 mg), TBD(1,5,7-Triazabicyclo[4.4.0]dec-5-ene) (0.1 mmol, 13.9 mg) and disulfide (0.3 mmol).. Then alcohol (2 mmol), acetonitrile (2.00 mL) and  $\text{P}_4$  (6.2 mg total of  $\text{P}_4$ , a 0.125 M solution of  $\text{P}_4$  in toluene, 0.40 mL) were sequentially added to the system. Then the system was stirred at 70 °C (oil bath) for 16 h. After competition, the solvent was evaporated by rotary evaporation, the crude reaction mixture was purified by flash chromatography using petroleum-AcOEt [4:1 (v/v)] as the eluent to give the product.

#### General procedure 2: Synthesis of phosphates (7a-7i)

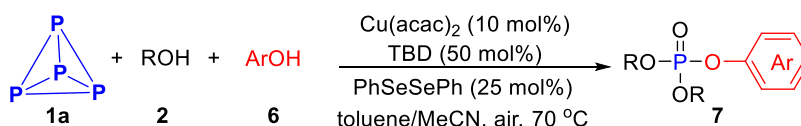

#### Supplementary Scheme 1-2

To an oven-dried schlenk tube with a magnetic stir bar was added  $\text{Cu(acac)}_2$  (0.02 mmol, 5.3 mg), TBD(1,5,7-Triazabicyclo[4.4.0]dec-5-ene) (0.1 mmol, 13.9 mg), diselenide (0.05 mmol) and phenol (0.4 mmol). Then alcohol (2 mmol), acetonitrile (2.00 mL) and  $\text{P}_4$  (6.2 mg total of  $\text{P}_4$ , a 0.125 M solution of  $\text{P}_4$  in toluene, 0.40 mL) were sequentially added to the system. Then the system was stirred at 70 °C (oil bath) for 16 h. After competition, the solvent was evaporated by rotary evaporation, the crude reaction mixture was purified by flash chromatography using petroleum-AcOEt [4:1 (v/v)] as the eluent to give the product.

#### General procedure 3: Gram-scale synthesis of *O,O*-diethyl *S*-phenyl phosphorothioate (4a)

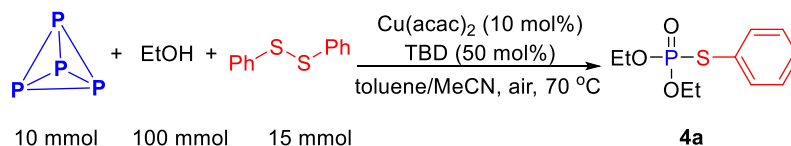

#### Supplementary Scheme 1-3

To an oven-dried schlenk bottle with a magnetic stir bar was added  $\text{Cu(acac)}_2$  (1 mmol, 261 mg), TBD (1,5,7-Triazabicyclo[4.4.0]dec-5-ene) (5 mmol, 696 mg) and diphenyl disulfide (15 mmol, 3.275g). Then ethanol (100 mmol), acetonitrile (100 mL) and  $\text{P}_4$  (310 mg total of  $\text{P}_4$ , a 0.125 M solution of  $\text{P}_4$  in toluene, 20 mL) were sequentially added to the system. Then the system was stirred at 70 °C (oil bath) for 72 h. After competition, the solvent was evaporated by rotary evaporation, the crude reaction mixture was purified by flash chromatography using petroleum-AcOEt [4:1 (v/v)] as the eluent to give the product **4a** (1.771 g, 72%).

**General procedure 4: Transformation of *O,O*-diethyl *S*-phenyl phosphorothioate (4a)**

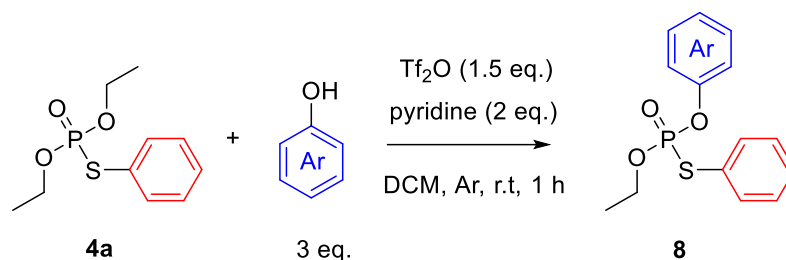

**Supplementary Scheme 1-4**

To an oven-dried schlenk tube with a magnetic stir bar containing *O,O*-diethyl *S*-phenyl phosphorothioate (**4a**) (0.2 mmol, 49.2 mg) was evacuated and purged with argon three times. Then  $\text{Tf}_2\text{O}$  (0.3 mmol, 51  $\mu\text{L}$ ) and pyridine (0.4 mmol, 33  $\mu\text{L}$ ) were added. The mixture was stirred at room temperature for 15 mins. Then phenol (0.6 mmol) was added under argon atmosphere, the reaction mixture was stirred at room temperature for 1 h. After completion, the solvent was evaporated by rotary evaporation, the crude reaction mixture was purified by flash chromatography using petroleum-AcOEt [3:1 (v/v)] as the eluent to give the products **8a** and **8b**.

**4. Control experiments and  $^{31}\text{P}$  NMR spectra for the synthesis of phosphorothioates.**

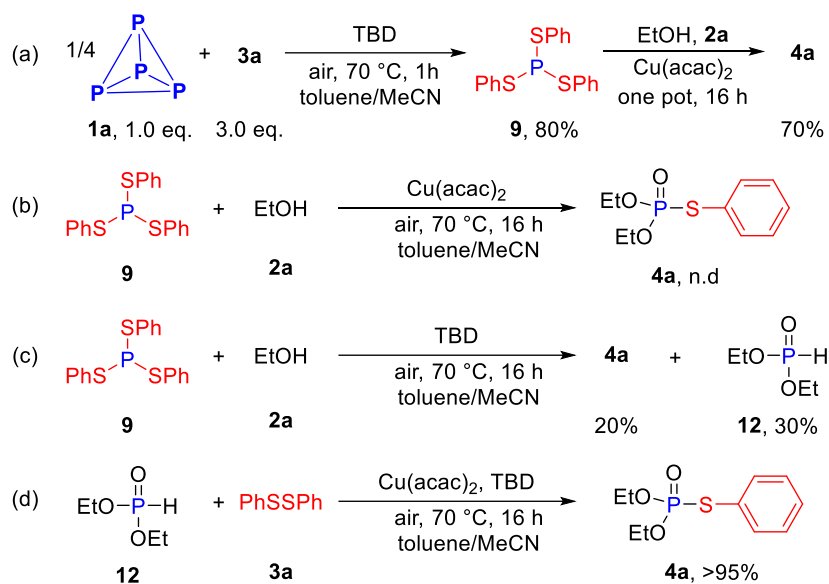

**Supplementary Scheme 2-1. Control experiments A.**

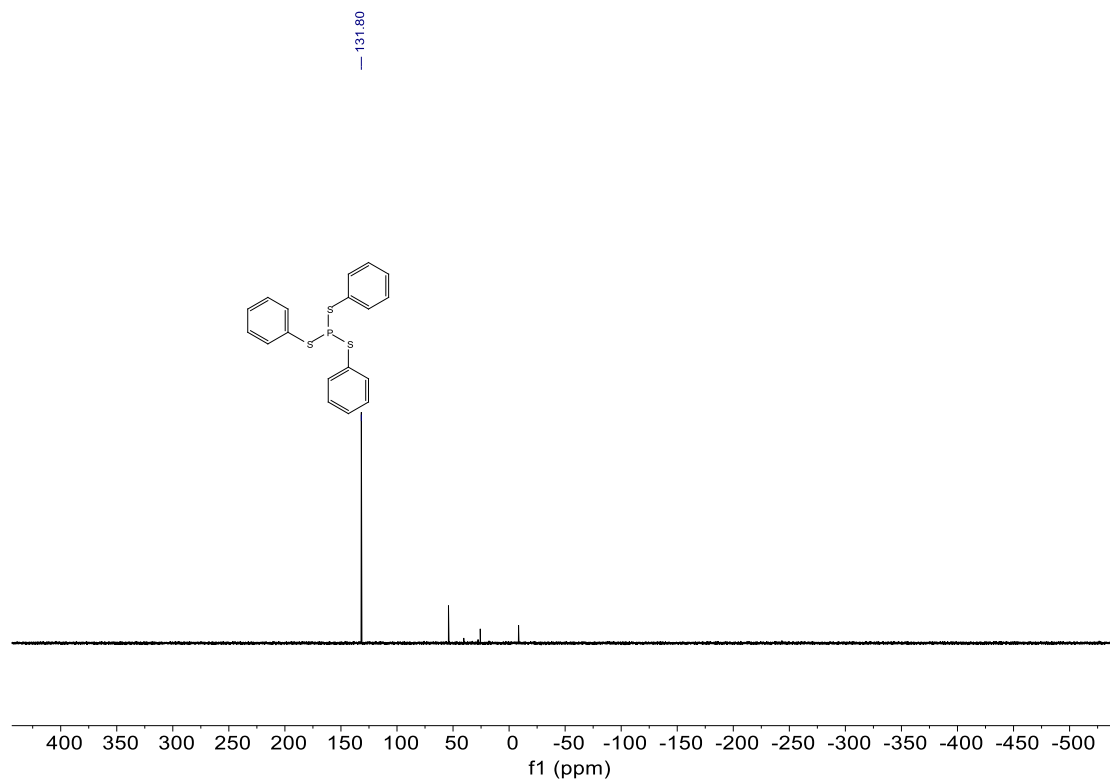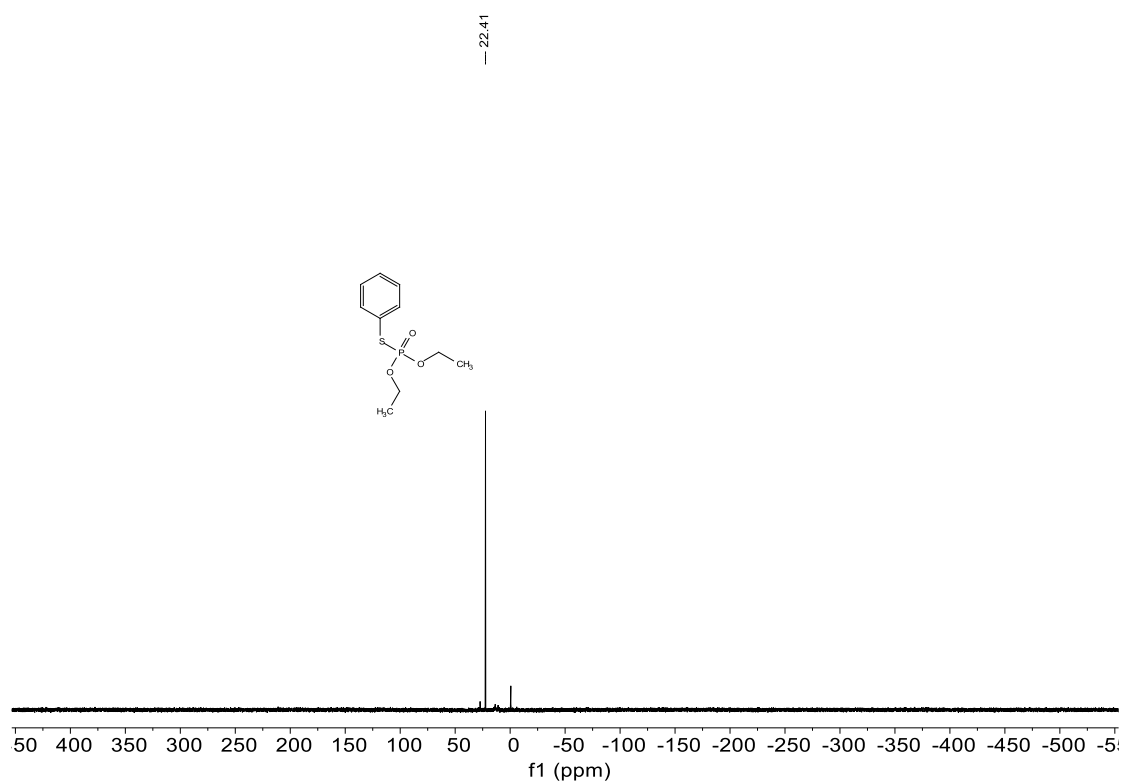

Supplementary figure 1-1.  $^{31}\text{P}\{^1\text{H}\}$  spectrum of supplementary scheme 2-1 (a).

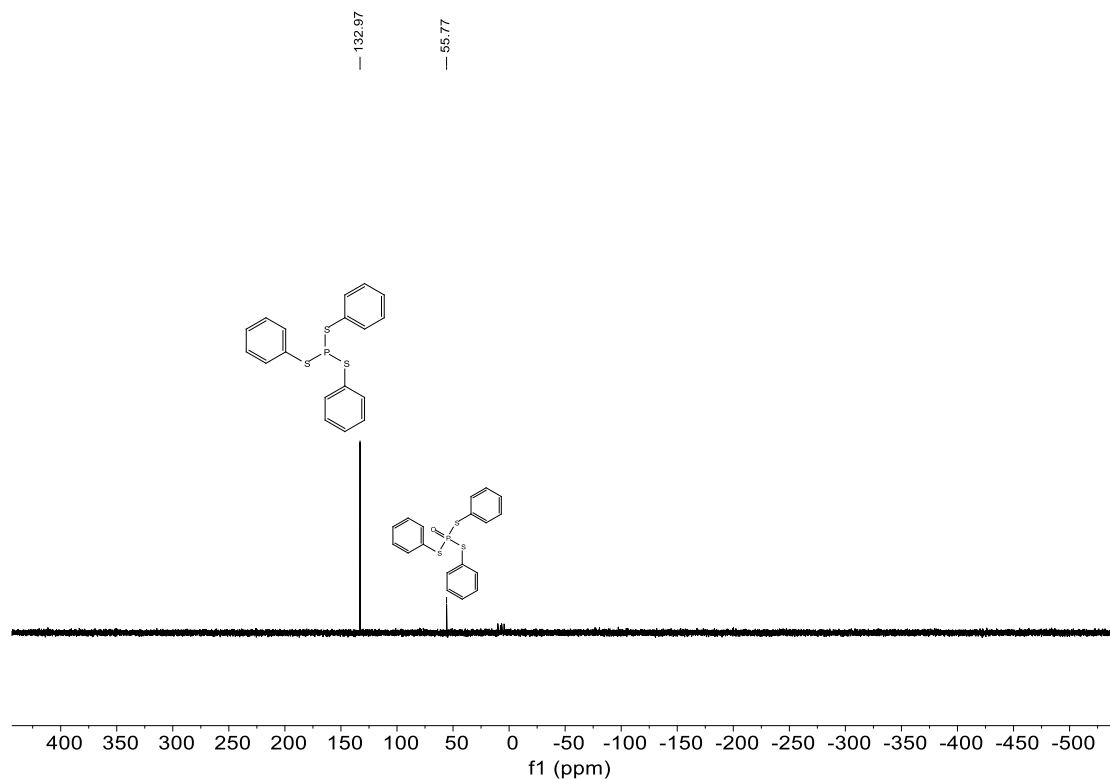

Supplementary figure 1-2.  $^{31}\text{P}\{^1\text{H}\}$  spectrum of supplementary scheme 2-1 (b).

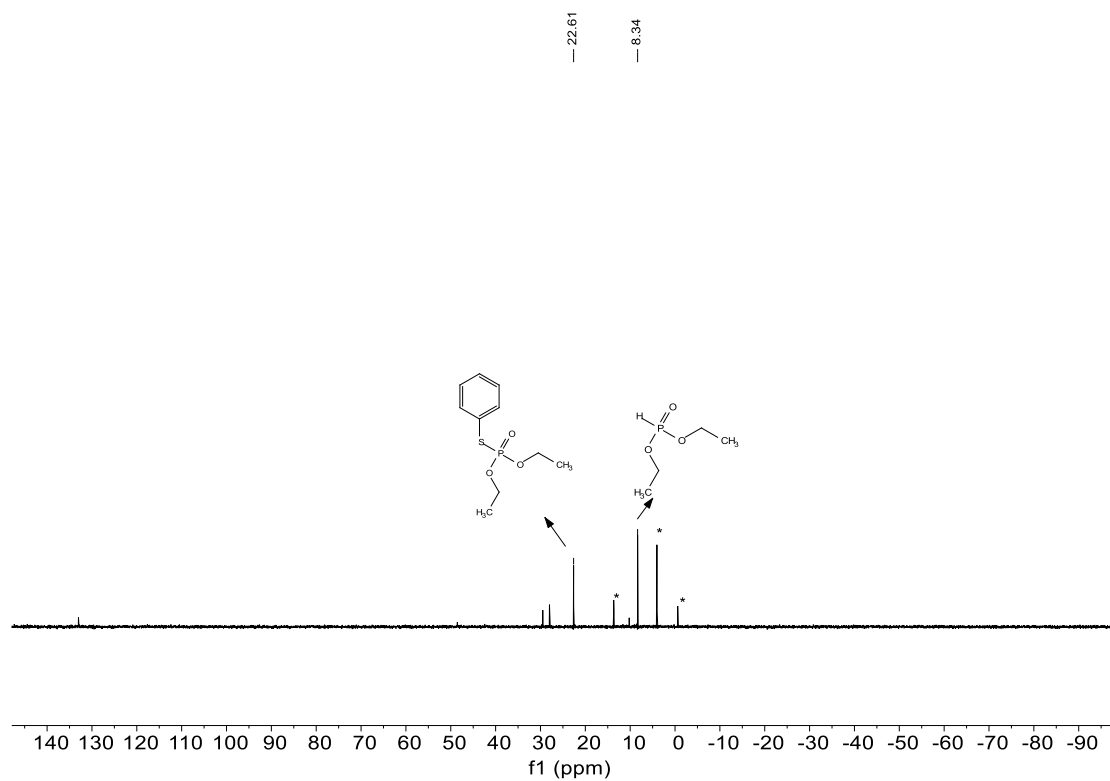

Supplementary figure 1-3.  $^{31}\text{P}\{^1\text{H}\}$  spectrum of supplementary scheme 2-1 (c).

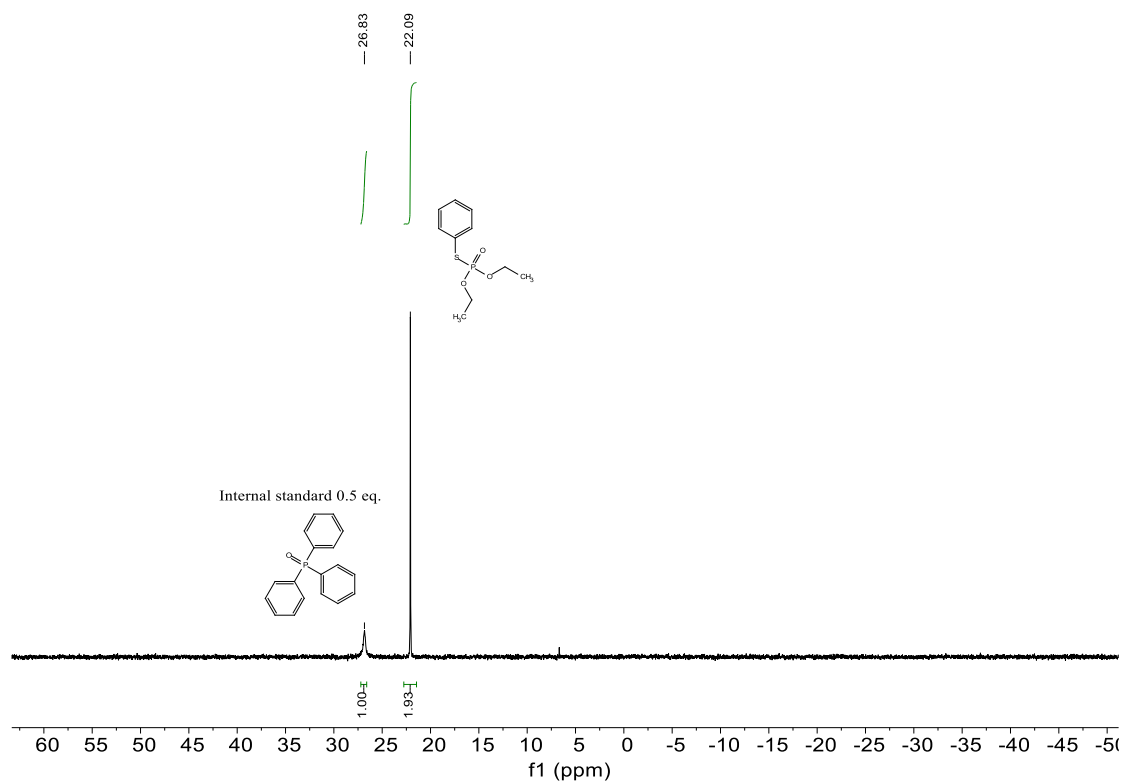

Supplementary figure 1-4.  $^{31}\text{P}\{^1\text{H}\}$  spectrum of supplementary scheme 2-1 (d).

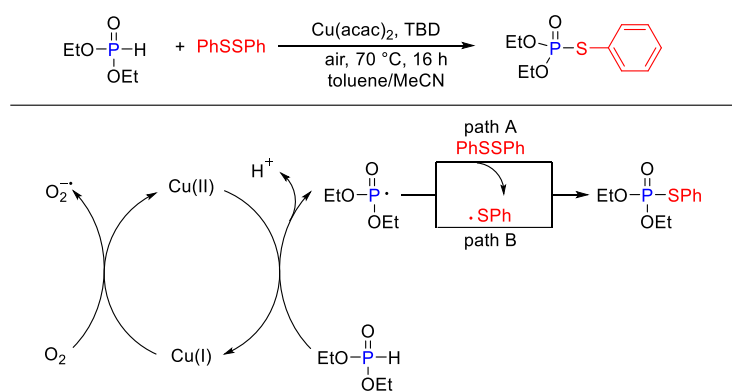

Supplementary Scheme 2-2. The propose mechanism for the copper-catalyzed cross-coupling reaction of *H*-phosphonates and disulfide (Supplementary Scheme 2-1 d).



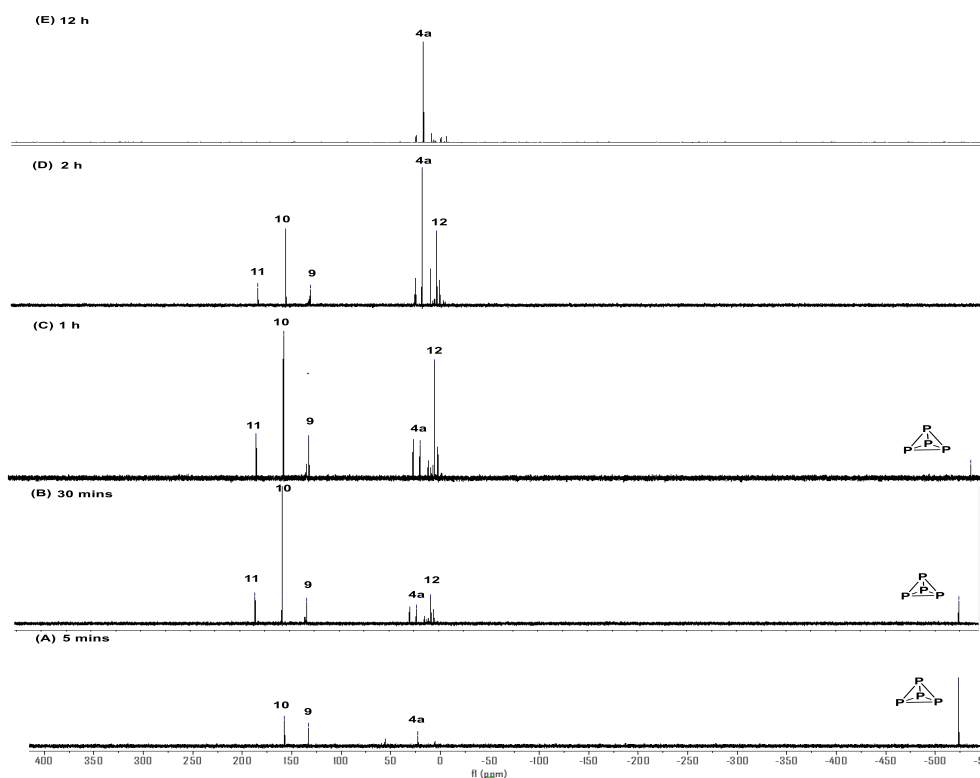

Supplementary Scheme 2-3. In situ NMR study on the mechanism of reaction A.

## 5. Control experiments and $^{31}\text{P}$ NMR spectra for the synthesis of mixed phosphates.

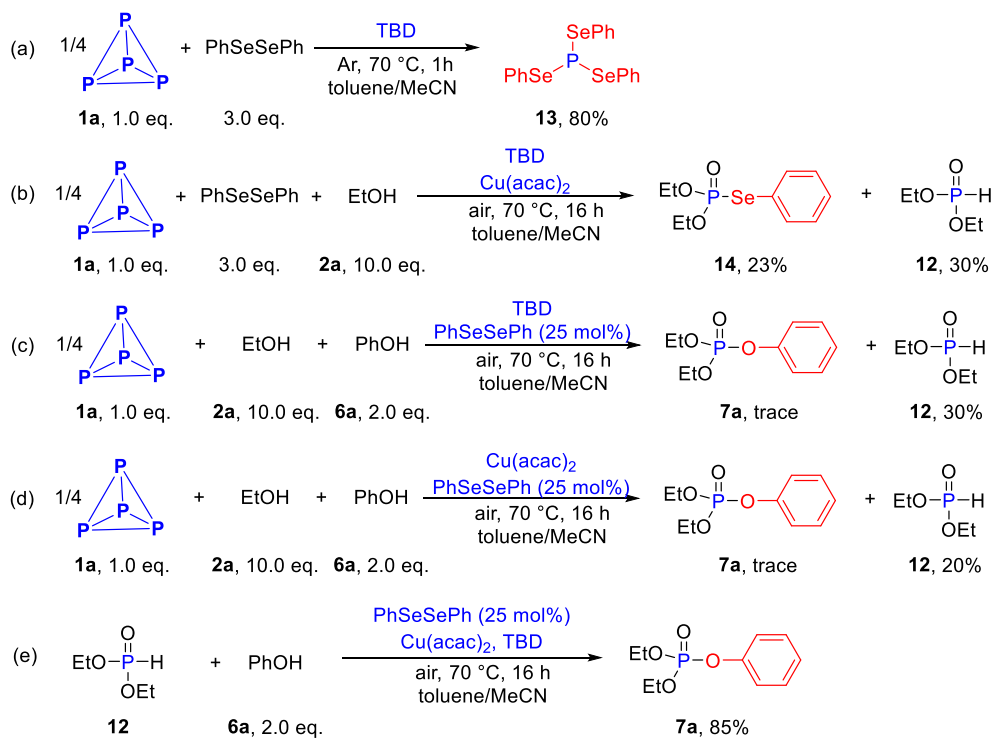

Supplementary Scheme 3-1. Control experiments B.

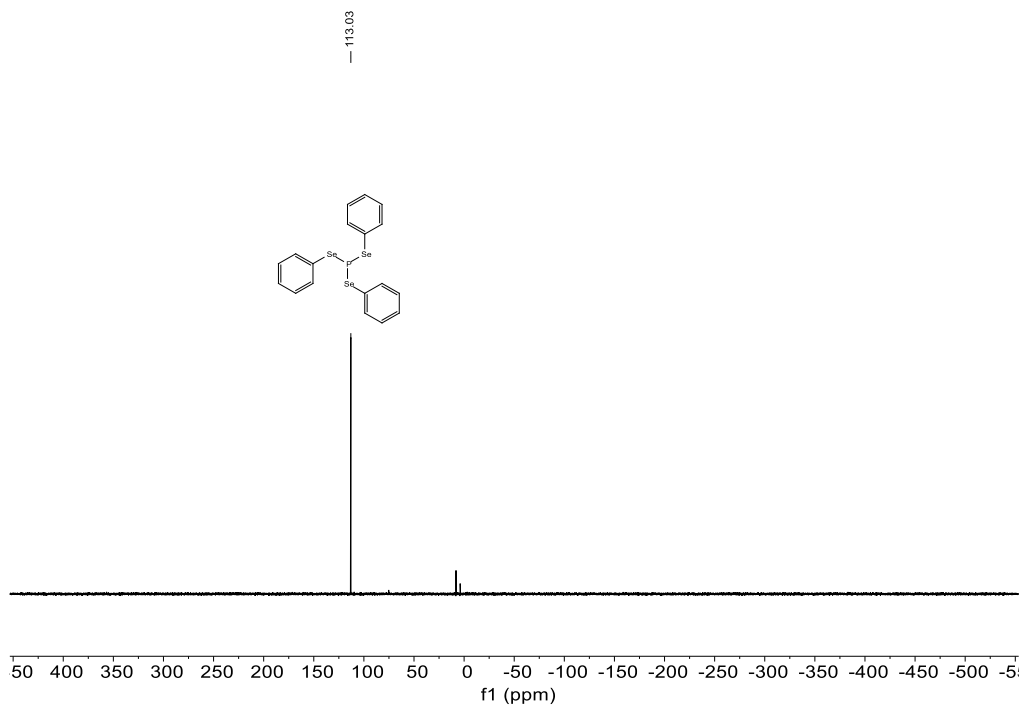

Supplementary figure 2-1.  $^{31}\text{P}\{^1\text{H}\}$  spectrum of supplementary scheme 3-1 (a).

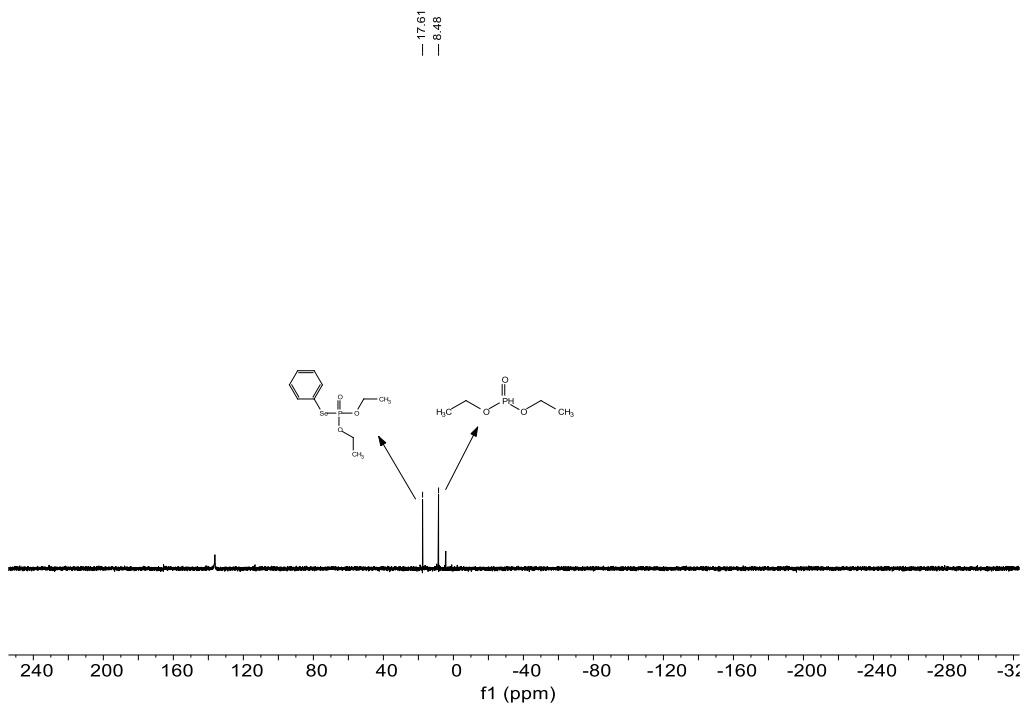

Supplementary figure 2-2.  $^{31}\text{P}\{^1\text{H}\}$  spectrum of supplementary scheme 3-1 (b).

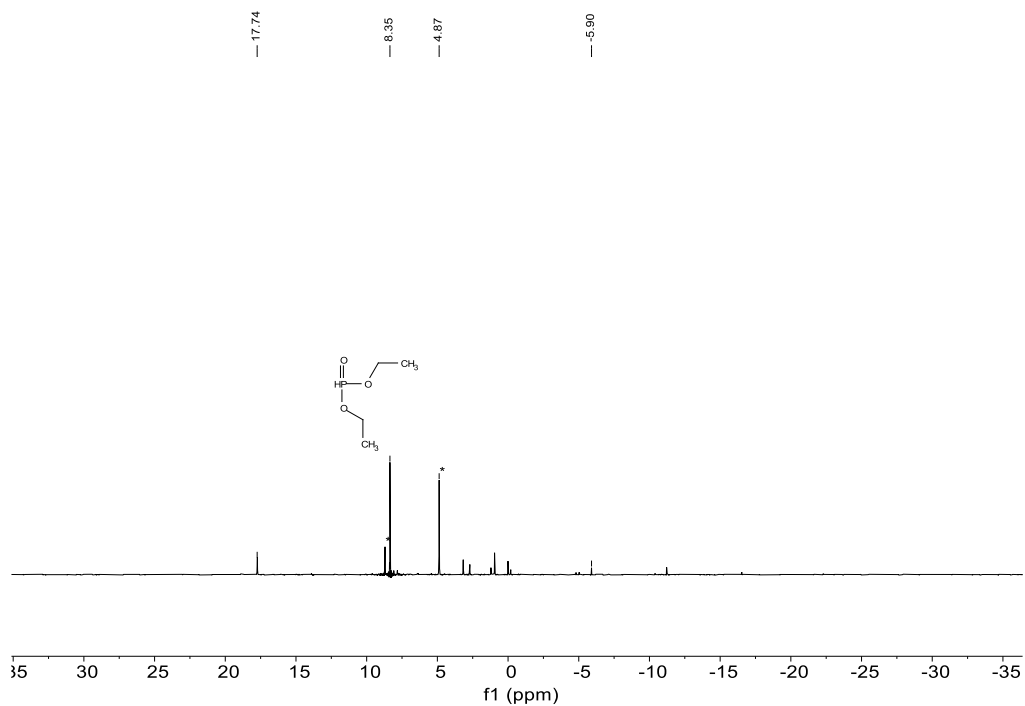

Supplementary figure 2-3.  $^{31}\text{P}\{^1\text{H}\}$  spectrum of supplementary scheme 3-1 (c).

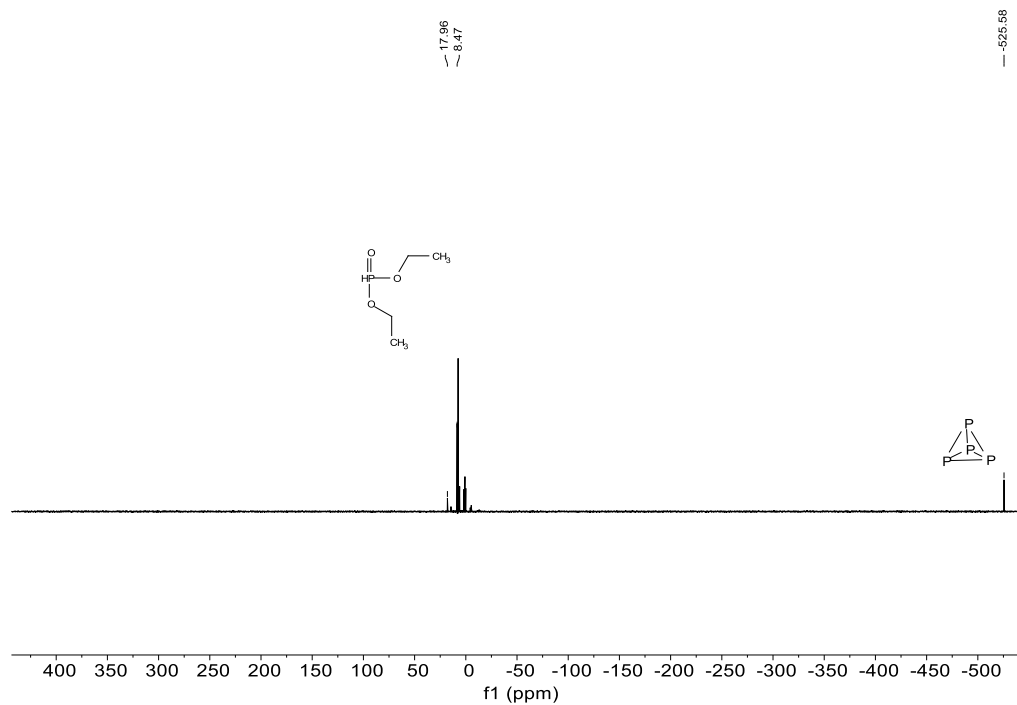

Supplementary figure 2-4.  $^{31}\text{P}\{^1\text{H}\}$  spectrum of supplementary scheme 3-1 (d).

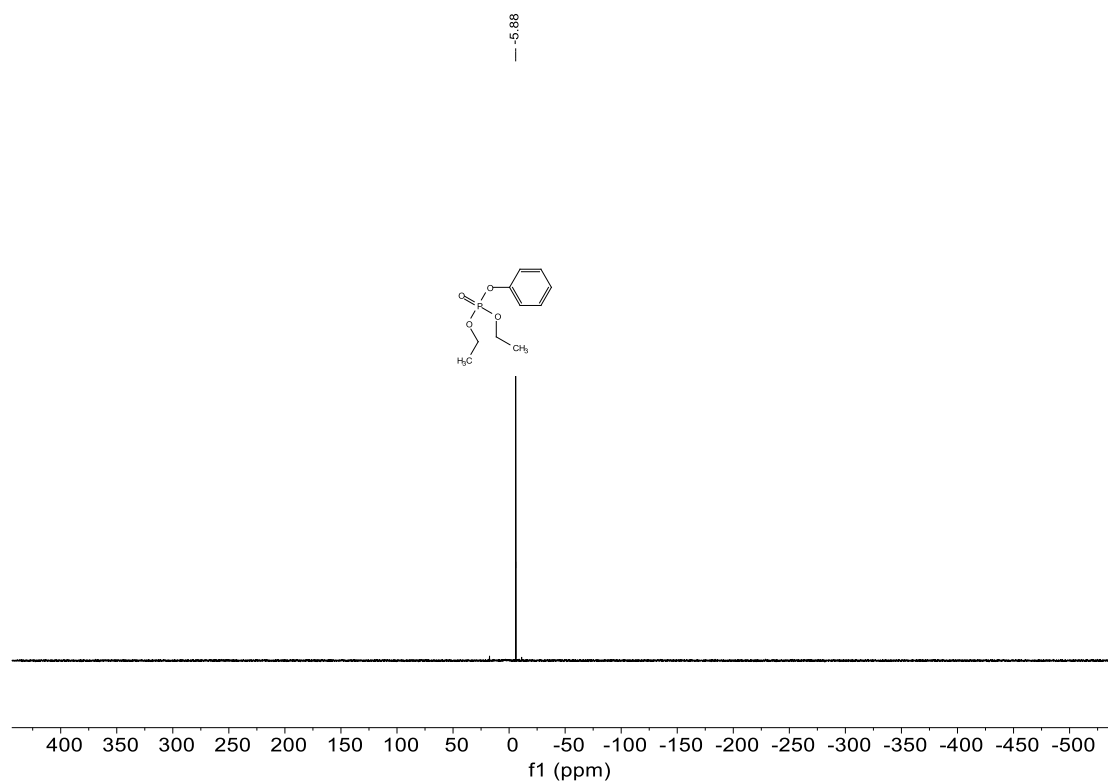

Supplementary figure 2-4.  $^{31}\text{P}\{^1\text{H}\}$  spectrum of supplementary scheme 3-1 (e).

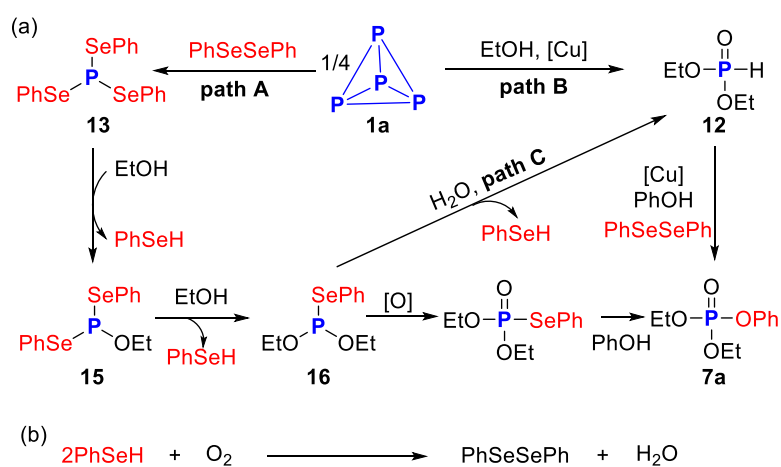

Supplementary Scheme 3-2. The propose mechanism for the multicomponent synthesis of mixed phosphonates from  $\text{P}_4$ .

## 6. Characterization for products.

### *O,O*-diethyl *S*-phenyl phosphorothioate (4a, CAS Registry No. 1889-58-3)

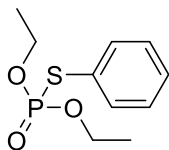

Light yellow oil; 44.2 mg, 90% yield;  $^1\text{H NMR}$  ( $\text{CDCl}_3$ , 500 MHz):  $\delta$  7.55 (dt,  $J = 7.7$ , 2.0 Hz, 2H), 7.42-7.27 (m, 3H), 4.26-4.06 (m, 4H), 1.28 (t,  $J = 7.1$  Hz, 6H);  $^{13}\text{C}\{^1\text{H}\}$  NMR ( $\text{CDCl}_3$ , 126 MHz):  $\delta$  134.69 (d,  $J = 5.0$  Hz), 129.47 (d,  $J = 2.1$  Hz), 129.12 (d,  $J = 2.7$  Hz), 126.76 (d,  $J = 7.3$  Hz), 64.23 (d,  $J = 6.3$  Hz), 16.12 (d,  $J = 7.1$  Hz);  $^{31}\text{P}\{^1\text{H}\}$  NMR ( $\text{CDCl}_3$ , 202 MHz):  $\delta$  22.86 HRMS:  $[\text{M}+\text{Na}]^+$   $m/z$  calcd for  $\text{C}_{10}\text{H}_{15}\text{O}_3\text{PSNa}^+$  269.0372, found 269.0370.

### *O,O*-diethyl *S*-(*p*-tolyl) phosphorothioate (4b, CAS Registry No. 4143-38-8)

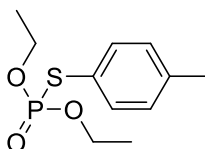

Light yellow oil; 45.2 mg, 87% yield;  $^1\text{H NMR}$  ( $\text{CDCl}_3$ , 500 MHz):  $\delta$  7.42 (dd,  $J = 8.2$ , 2.2 Hz, 2H), 7.13 (d,  $J = 7.9$  Hz, 2H), 4.24-4.09 (m, 4H), 2.32 (s, 3H), 1.29 (t,  $J = 7.1$  Hz, 6H);  $^{13}\text{C}\{^1\text{H}\}$  NMR ( $\text{CDCl}_3$ , 126 MHz):  $\delta$  139.44 (d,  $J = 3.1$  Hz), 134.77 (d,  $J = 5.2$  Hz), 130.31 (d,  $J = 2.4$  Hz), 123.01 (d,  $J = 7.2$  Hz), 64.15 (d,  $J = 6.3$  Hz), 21.32, 16.17 (d,  $J = 7.1$  Hz);  $^{31}\text{P}\{^1\text{H}\}$  NMR ( $\text{CDCl}_3$ , 202 MHz):  $\delta$  23.30; HRMS:  $[\text{M}+\text{Na}]^+$   $m/z$  calcd for  $\text{C}_{11}\text{H}_{17}\text{O}_3\text{PSNa}^+$  283.0528, found 283.0529.

### *O,O*-diethyl *S*-(4-methoxyphenyl) phosphorothioate (4c, CAS Registry No. 56809-76-9)

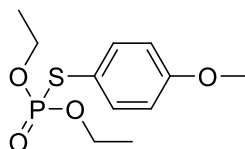

Light yellow oil; 36.5 mg, 66% yield;  $^1\text{H NMR}$  ( $\text{CDCl}_3$ , 500 MHz):  $\delta$  7.47-7.41 (m, 2H), 6.87-6.81 (m, 2H), 4.22-4.04 (m, 4H), 3.76 (s, 3H), 1.27 (t,  $J = 7.1$  Hz, 6H);  $^{13}\text{C}\{^1\text{H}\}$  NMR ( $\text{CDCl}_3$ , 126 MHz):  $\delta$  160.61 (d,  $J = 2.8$  Hz), 136.48 (d,  $J = 4.8$  Hz), 116.78 (d,  $J = 7.1$  Hz), 115.13 (d,  $J = 2.6$  Hz), 64.10 (d,  $J = 6.4$  Hz), 55.49, 16.17 (d,  $J = 7.0$  Hz);  $^{31}\text{P}\{^1\text{H}\}$  NMR ( $\text{CDCl}_3$ , 202 MHz):  $\delta$  23.50; HRMS:  $[\text{M}+\text{Na}]^+$   $m/z$  calcd for  $\text{C}_{11}\text{H}_{17}\text{O}_4\text{PSNa}^+$  299.0477, found 299.0480.

### *S*-(4-(*tert*-butyl)phenyl) *O,O*-diethyl phosphorothioate (4d, CAS Registry No. 4521-71-4)

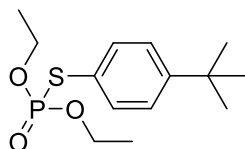

Light yellow oil; 37.8 mg, 67% yield;  $^1\text{H NMR}$  ( $\text{CDCl}_3$ , 500 MHz):  $\delta$  7.46 (d,  $J = 8.0$  Hz, 2H), 7.34 (d,  $J = 8.0$  Hz, 2H), 4.24-4.14 (m, 4H), 1.31-1.28 (m, 15H);  $^{13}\text{C}\{^1\text{H}\}$  NMR ( $\text{CDCl}_3$ , 126 MHz):  $\delta$  152.55 (d,  $J = 3.3$  Hz), 134.52 (d,  $J = 5.1$  Hz), 126.65 (d,  $J = 2.3$  Hz), 123.06 (d,  $J = 7.2$  Hz), 64.18 (d,  $J = 6.1$  Hz), 34.85, 31.36, 16.18 (d,  $J = 7.2$  Hz);  $^{31}\text{P}\{^1\text{H}\}$  NMR ( $\text{CDCl}_3$ , 242 MHz):  $\delta$  23.30; HRMS:  $[\text{M}+\text{Na}]^+$   $m/z$  calcd for  $\text{C}_{14}\text{H}_{23}\text{O}_3\text{PSNa}^+$  325.0998, found 325.0997.

***S*-([1,1'-biphenyl]-4-yl) *O,O*-diethyl phosphorothioate (4e, CAS Registry No. 1929539-74-1)**

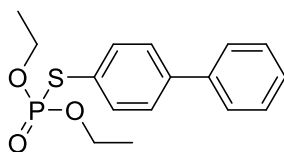

Light yellow oil; 48.3mg, 75% yield;  $^1\text{H NMR}$  ( $\text{CDCl}_3$ , 500 MHz):  $\delta$  7.63 (dd,  $J = 8.4, 2.0$  Hz, 2H), 7.59-7.53 (m, 4H), 7.44 (dd,  $J = 8.5, 6.9$  Hz, 2H), 7.38-7.33 (m, 1H), 4.29-4.17 (m, 4H), 1.33 (t,  $J = 7.1$  Hz, 6H);  $^{13}\text{C}\{^1\text{H}\}$  NMR ( $\text{CDCl}_3$ , 126 MHz):  $\delta$  142.18 (d,  $J = 2.9$  Hz), 140.13, 135.09 (d,  $J = 5.2$  Hz), 129.08, 128.20 (d,  $J = 2.3$  Hz), 128.01, 127.27, 125.60 (d,  $J = 7.2$  Hz), 64.34 (d,  $J = 6.3$  Hz), 16.23 (d,  $J = 7.1$  Hz);  $^{31}\text{P}\{^1\text{H}\}$  NMR ( $\text{CDCl}_3$ , 202 MHz):  $\delta$  22.81; HRMS:  $[\text{M}+\text{H}]^+$   $m/z$  calcd for  $\text{C}_{16}\text{H}_{20}\text{O}_3\text{PS}^+$  323.0865, found 323.0864.

***S*-(4-aminophenyl) *O,O*-diethyl phosphorothioate (4f, CAS Registry No. 94409-35-5)**

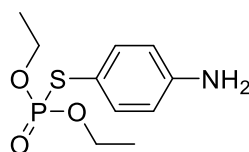

Light yellow oil; 31.9 mg, 61% yield;  $^1\text{H NMR}$  ( $\text{CDCl}_3$ , 500 MHz):  $\delta$  7.32-7.21 (m, 2H), 6.65-6.57 (m, 2H), 4.20-4.10 (m, 4H), 3.85 (brs, 2H), 1.29 (t,  $J = 7.1$  Hz, 6H);  $^{13}\text{C}\{^1\text{H}\}$  NMR ( $\text{CDCl}_3$ , 126MHz):  $\delta$  147.96, 136.55 (d,  $J = 4.6$  Hz), 115.90 (d,  $J = 2.5$  Hz), 113.08, 64.08 (d,  $J = 6.3$  Hz), 16.26 (d,  $J = 7.2$  Hz);  $^{31}\text{P}\{^1\text{H}\}$  NMR ( $\text{CDCl}_3$ , 242 MHz):  $\delta$  24.10; HRMS:  $[\text{M}+\text{Na}]^+$   $m/z$  calcd for  $\text{C}_{10}\text{H}_{16}\text{NO}_3\text{PSNa}^+$  284.0481, found 284.0480.

***O,O*-diethyl *S*-(2-fluorophenyl) phosphorothioate (4g, CAS Registry No. 1883501-47-0)**

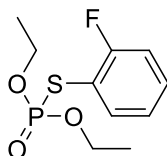

Light yellow oil; 40.1 mg, 76% yield;  $^1\text{H NMR}$  ( $\text{CDCl}_3$ , 500 MHz):  $\delta$  7.64-7.58 (m, 1H), 7.37(ddd,  $J = 10.3, 7.6, 3.6$  Hz, 1H), 7.15-7.10 (m, 2H), 4.28-4.15 (m, 4H), 1.31(t,  $J = 7.1$  Hz, 6H);  $^{13}\text{C}\{^1\text{H}\}$  NMR ( $\text{CDCl}_3$ , 126 MHz):  $\delta$  162.29 (dd,  $J = 248.8, 5.6$  Hz), 137.71 (d,  $J = 4.2$  Hz), 131.82 (dd,  $J = 8.1, 3.2$  Hz), 116.51 (dd,  $J = 23.1, 2.7$  Hz), 114.05 (dd,  $J = 19.3, 7.6$  Hz), 64.46 (d,  $J = 6.1$  Hz), 16.15 (d,  $J = 7.4$  Hz);  $^{31}\text{P}\{^1\text{H}\}$  NMR ( $\text{CDCl}_3$ , 202 MHz):  $\delta$  21.36 (d,  $J = 4.0$  Hz);  $^{19}\text{F}\{^1\text{H}\}$  NMR ( $\text{CDCl}_3$ , 471 MHz):  $\delta$  -106.23 (d,  $J = 4.0$  Hz); HRMS:  $[\text{M}+\text{Na}]^+$   $m/z$  calcd for  $\text{C}_{10}\text{H}_{14}\text{FO}_3\text{PSNa}^+$  287.0278, found 287.0277.

***S*-(4-chlorophenyl) *O,O*-diethyl phosphorothioate (4k, CAS Registry No. 4524-70-3)**

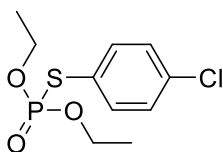

Light yellow oil; 48.3 mg, 86% yield;  $^1\text{H NMR}$  ( $\text{CDCl}_3$ , 500 MHz):  $\delta$  7.51-7.46(m, 2H), 7.34-7.28(m, 2H), 4.24-4.10 (m, 4H), 1.30 (t,  $J = 7.1$  Hz, 6H);  $^{13}\text{C}\{^1\text{H}\}$  NMR ( $\text{CDCl}_3$ , 126MHz):  $\delta$  135.95 (d,  $J = 5.1$  Hz), 135.69 (d,  $J = 3.3$  Hz), 129.74 (d,  $J = 2.4$  Hz), 125.38 (d,  $J = 7.4$  Hz), 64.46

(d,  $J = 6.4$  Hz), 16.21 (d,  $J = 7.0$  Hz);  $^{31}\text{P}\{^1\text{H}\}$  NMR ( $\text{CDCl}_3$ , 202 MHz):  $\delta$  22.13; HRMS:  $[\text{M}+\text{Na}]^+$   $m/z$  calcd for  $\text{C}_{10}\text{H}_{14}\text{ClO}_3\text{PSNa}^+$  302.9982, found 302.9985.

***S*-(4-bromophenyl) *O,O*-diethyl phosphorothioate (4i, CAS Registry No. 15224-36-9)**

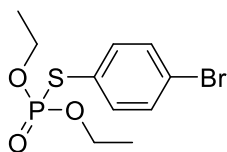

Light yellow oil; 52.7 mg, 81% yield;  $^1\text{H}$  NMR ( $\text{CDCl}_3$ , 500 MHz):  $\delta$  7.47-7.45 (m, 2H), 7.42-7.40 (m, 2H), 4.24-4.09 (m, 4H), 1.30 (t,  $J = 7.1$  Hz, 6H);  $^{13}\text{C}\{^1\text{H}\}$  NMR ( $\text{CDCl}_3$ , 126 MHz):  $\delta$  136.15 (d,  $J = 5.3$  Hz), 132.69 (d,  $J = 2.1$  Hz), 126.04 (d,  $J = 7.3$  Hz), 123.83 (d,  $J = 3.6$  Hz), 64.46 (d,  $J = 6.4$  Hz), 16.21 (d,  $J = 7.2$  Hz);  $^{31}\text{P}\{^1\text{H}\}$  NMR ( $\text{CDCl}_3$ , 202 MHz):  $\delta$  21.91; HRMS:  $[\text{M}+\text{H}]^+$   $m/z$  calcd for  $\text{C}_{10}\text{H}_{15}\text{BrO}_3\text{PS}^+$  324.9657, found 324.9658.

***O,O*-diethyl *S*-(4-(trifluoromethyl)phenyl) phosphorothioate (4j, CAS Registry No. 1883501-42-5)**

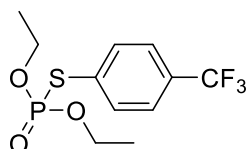

Light yellow oil; 25.7 mg, 41% yield;  $^1\text{H}$  NMR ( $\text{CDCl}_3$ , 500 MHz):  $\delta$  7.70 (dd,  $J = 8.4, 2.0$  Hz, 2H), 7.59 (d,  $J = 8.2$  Hz, 2H), 4.27-4.13 (m, 2H), 1.32 (t,  $J = 7.1$  Hz, 6H);  $^{13}\text{C}\{^1\text{H}\}$  NMR ( $\text{CDCl}_3$ , 126 MHz):  $\delta$  134.50 (d,  $J = 5.5$  Hz), 132.20 (d,  $J = 6.6$  Hz), 130.97 (dq,  $J = 2.2, 33.0$  Hz), 126.12 (m), 123.74 (q,  $J = 272.0$  Hz), 64.46 (d,  $J = 6.4$  Hz), 16.01 (d,  $J = 7.0$  Hz);  $^{31}\text{P}\{^1\text{H}\}$  NMR ( $\text{CDCl}_3$ , 202 MHz):  $\delta$  21.29;  $^{19}\text{F}\{^1\text{H}\}$  NMR ( $\text{CDCl}_3$ , 471 MHz):  $\delta$  -62.92; HRMS:  $[\text{M}+\text{Na}]^+$   $m/z$  calcd for  $\text{C}_{11}\text{H}_{14}\text{F}_3\text{O}_3\text{PSNa}^+$  337.0245, found 337.0244.

***O,O*-diethyl *S*-(3-nitrophenyl) phosphorothioate (4k, CAS Registry No. 4184-51-4)**

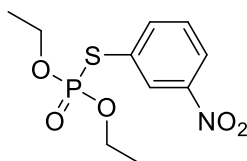

Yellow oil; 33.9 mg, 58% yield;  $^1\text{H}$  NMR ( $\text{CDCl}_3$ , 500 MHz):  $\delta$  8.42 (d,  $J = 2.3$  Hz, 1H), 8.20 (d,  $J = 8.2$  Hz, 1H), 7.91 (d,  $J = 7.7$  Hz, 1H), 7.54 (t,  $J = 8.0$  Hz, 1H), 4.28-4.15 (m, 4H), 1.33 (t,  $J = 7.0$  Hz, 6H);  $^{13}\text{C}\{^1\text{H}\}$  NMR ( $\text{CDCl}_3$ , 126 MHz):  $\delta$  148.64, 140.39 (d,  $J = 5.1$  Hz), 130.28 (d,  $J = 2.0$  Hz), 129.84 (d,  $J = 6.9$  Hz), 129.24 (d,  $J = 5.5$  Hz), 124.01 (d,  $J = 2.5$  Hz), 64.83 (d,  $J = 6.5$  Hz), 16.19 (d,  $J = 6.9$  Hz);  $^{31}\text{P}\{^1\text{H}\}$  NMR ( $\text{CDCl}_3$ , 242 MHz):  $\delta$  20.71; HRMS:  $[\text{M}+\text{H}]^+$   $m/z$  calcd for  $\text{C}_{10}\text{H}_{15}\text{NO}_5\text{PS}^+$  292.0402, found 292.0402.

***O,O*-diethyl *S*-(4-nitrophenyl) phosphorothioate (4l, CAS Registry No. 3270-82-8)**

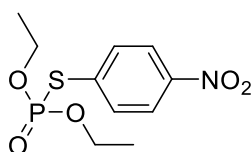

Yellow oil; 34.4 mg, 59% yield;  $^1\text{H NMR}$  ( $\text{CDCl}_3$ , 500 MHz):  $\delta$  8.18 (d,  $J$  = 8.5 Hz, 2H), 7.75 (dd,  $J$  = 8.8, 1.7 Hz, 2H), 4.29-4.14 (m, 4H), 1.33 (t,  $J$  = 7.1 Hz, 6H);  $^{13}\text{C}\{^1\text{H}\}$  NMR ( $\text{CDCl}_3$ , 126 MHz):  $\delta$  148.04, 136.47 (d,  $J$  = 6.6 Hz), 134.31 (d,  $J$  = 1.7 Hz), 124.31 (d,  $J$  = 1.7 Hz), 64.94 (d,  $J$  = 6.5 Hz), 16.22 (d,  $J$  = 6.9 Hz);  $^{31}\text{P}\{^1\text{H}\}$  NMR ( $\text{CDCl}_3$ , 202 MHz):  $\delta$  20.08; HRMS:  $[\text{M}+\text{H}]^+$   $m/z$  calcd for  $\text{C}_{10}\text{H}_{15}\text{NO}_5\text{PS}^+$  292.0402, found 292.0404.

**methyl 2-((diethoxyphosphoryl)thio)benzoate (4m, CAS Registry No. 2222022-82-2)**

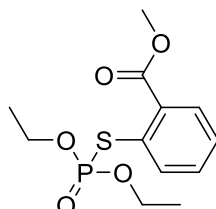

Brown oil; 20.7 mg, 34% yield;  $^1\text{H NMR}$  ( $\text{CDCl}_3$ , 500 MHz):  $\delta$  7.88 (dt,  $J$  = 8.0, 1.6 Hz, 1H), 7.81 (dt,  $J$  = 7.6, 1.3 Hz, 1H), 7.46 (dt,  $J$  = 7.7, 1.7 Hz, 1H), 7.39-7.33 (m, 1H), 4.23-4.10 (m, 4H), 3.92 (s, 3H), 1.28 (t,  $J$  = 7.1 Hz, 6H);  $^{13}\text{C}\{^1\text{H}\}$  NMR ( $\text{CDCl}_3$ , 126 MHz):  $\delta$  157.25, 135.35 (d,  $J$  = 5.0 Hz), 134.43 (d,  $J$  = 5.6 Hz), 132.16 (d,  $J$  = 1.8 Hz), 130.99, 128.53 (d,  $J$  = 6.8 Hz), 128.40 (d,  $J$  = 2.2 Hz), 64.55 (d,  $J$  = 6.5 Hz), 52.61, 16.19 (d,  $J$  = 7.0 Hz);  $^{31}\text{P}\{^1\text{H}\}$  NMR ( $\text{CDCl}_3$ , 202 MHz):  $\delta$  22.03; HRMS:  $[\text{M}+\text{Na}]^+$   $m/z$  calcd for  $\text{C}_{12}\text{H}_{17}\text{O}_5\text{PSNa}^+$  327.0426, found 327.0425.

**S-(3,5-dimethylphenyl) O,O-diethyl phosphorothioate (4n, CAS Registry No. 1883501-37-8)**

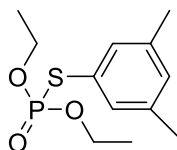

Light yellow oil; 45.5mg, 89% yield;  $^1\text{H NMR}$  ( $\text{CDCl}_3$ , 500 MHz):  $\delta$  7.17 (s, 2H), 6.96 (s, 1H), 4.24-4.11 (m, 4H), 2.28 (s, 6H), 1.30 (t,  $J$  = 7.1 Hz, 6H);  $^{13}\text{C}\{^1\text{H}\}$  NMR ( $\text{CDCl}_3$ , 101 MHz):  $\delta$  139.12 (d,  $J$  = 2.4 Hz), 132.39 (d,  $J$  = 5.3 Hz), 131.00 (d,  $J$  = 3.0 Hz), 125.90 (d,  $J$  = 7.1 Hz), 64.14 (d,  $J$  = 6.2 Hz), 21.30, 16.15 (d,  $J$  = 7.2 Hz);  $^{31}\text{P}\{^1\text{H}\}$  NMR ( $\text{CDCl}_3$ , 202 MHz):  $\delta$  23.29; HRMS:  $[\text{M}+\text{Na}]^+$   $m/z$  calcd for  $\text{C}_{12}\text{H}_{19}\text{O}_3\text{PSNa}^+$  297.0685, found 297.0683.

**S-(3,4-dimethoxyphenyl) O,O-diethyl phosphorothioate (4o, CAS Registry No. 2376402-64-9)**

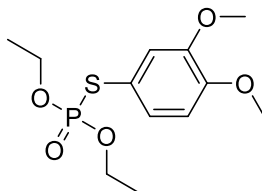

Light yellow oil; 36.0mg, 56% yield;  $^1\text{H NMR}$  ( $\text{CDCl}_3$ , 500 MHz):  $\delta$  7.10 (dt,  $J$  = 8.4, 2.5 Hz, 1H), 7.06 (q,  $J$  = 2.3 Hz, 1H), 6.81 (dd,  $J$  = 8.4, 2.5 Hz, 1H), 4.22-4.11 (m, 4H), 3.85 (s, 6H), 1.29 (t,  $J$  = 7.1 Hz, 6H);  $^{13}\text{C}\{^1\text{H}\}$  NMR ( $\text{CDCl}_3$ , 126 MHz):  $\delta$  150.35 (d,  $J$  = 3.2 Hz), 149.43 (d,  $J$  = 2.3 Hz), 128.06 (d,  $J$  = 5.7 Hz), 117.88 (d,  $J$  = 4.1 Hz), 117.03 (d,  $J$  = 7.4 Hz), 111.86 (d,  $J$  = 2.6 Hz), 64.23 (d,  $J$  = 6.6 Hz), 56.21, 56.11, 16.27 (d,  $J$  = 7.0 Hz);  $^{31}\text{P}\{^1\text{H}\}$  NMR ( $\text{CDCl}_3$ , 202 MHz):  $\delta$  23.44; HRMS:  $[\text{M}+\text{Na}]^+$   $m/z$  calcd for  $\text{C}_{12}\text{H}_{19}\text{O}_5\text{PSNa}^+$  329.0583, found 329.0583.



***S*-(2-(((2-(1H-indol-2-yl)ethyl)amino)oxy)carbonyl)phenyl) *O,O*-diethyl phosphorothioate (4p, new compound)**

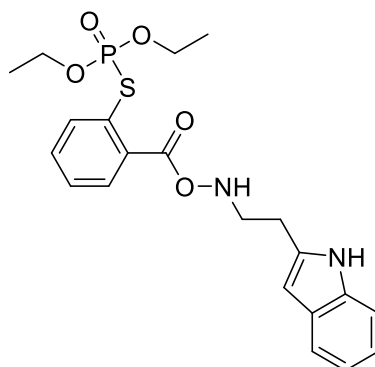

Brown oil; 26.0 mg, 29% yield;  $^1\text{H NMR}$  ( $\text{CDCl}_3$ , 500 MHz):  $\delta$  8.33 (s, 1H), 7.68 (s, 1H), 7.63 (d,  $J = 7.9$  Hz, 1H), 7.59 (dt,  $J = 7.7, 1.8$  Hz, 1H), 7.55 (dd,  $J = 7.7, 1.6$  Hz, 1H), 7.42 (tt,  $J = 7.6, 1.7$  Hz, 1H), 7.38-7.31 (m, 2H), 7.19-7.15 (m, 1H), 7.12-7.07 (m, 2H), 4.15-4.02 (m, 4H), 3.80 (dt,  $J = 7.3, 5.7$  Hz, 2H), 3.13 (t,  $J = 7.3$  Hz, 2H), 1.27 (t,  $J = 7.1$  Hz, 6H);  $^{13}\text{C}\{^1\text{H}\}$  NMR ( $\text{CDCl}_3$ , 126 MHz):  $\delta$  158.53, 143.58 (d,  $J = 5.3$  Hz), 137.35 (d,  $J = 4.1$  Hz), 136.63, 130.29 (d,  $J = 2.5$  Hz), 130.26 (d,  $J = 2.8$  Hz), 130.04 (d,  $J = 2.9$  Hz), 127.64, 122.45, 122.15, 121.73 (d,  $J = 7.1$  Hz), 119.47, 118.91, 113.18, 111.44, 65.08 (d,  $J = 7.2$  Hz), 40.66, 25.45, 16.25 (d,  $J = 7.0$  Hz);  $^{31}\text{P}\{^1\text{H}\}$  NMR ( $\text{CDCl}_3$ , 202 MHz):  $\delta$  23.83; HRMS:  $[\text{M}+\text{H}]^+$   $m/z$  calcd for  $\text{C}_{21}\text{H}_{26}\text{N}_2\text{O}_5\text{PS}^+$  449.1295, found 449.1296.

***O,O*-diethyl *S*-(naphthalen-2-yl) phosphorothioate (4q, CAS Registry No. 109161-61-7)**

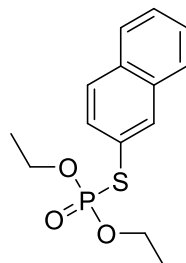

Light yellow oil; 46.2 mg, 78% yield;  $^1\text{H NMR}$  ( $\text{CDCl}_3$ , 500 MHz):  $\delta$  8.08 (s, 1H), 7.80 (ddt,  $J = 7.0, 3.9, 3.5$  Hz, 3H), 7.61 (dt,  $J = 8.6, 1.6$  Hz, 1H), 7.54-7.46 (m, 2H), 4.30-4.14 (m, 4H), 1.30 (t,  $J = 7.1$  Hz, 6H);  $^{13}\text{C}\{^1\text{H}\}$  NMR ( $\text{CDCl}_3$ , 126 MHz):  $\delta$  134.55 (d,  $J = 7.0$  Hz), 133.78 (d,  $J = 2.3$  Hz), 133.21 (d,  $J = 2.0$  Hz), 131.09 (d,  $J = 4.1$  Hz), 129.16 (d,  $J = 1.8$  Hz), 127.24, 125.93, 123.96 (d,  $J = 7.2$  Hz), 64.35 (d,  $J = 6.3$  Hz), 16.20 (d,  $J = 7.3$  Hz);  $^{31}\text{P}\{^1\text{H}\}$  NMR ( $\text{CDCl}_3$ , 202 MHz):  $\delta$  22.85; HRMS:  $[\text{M}+\text{Na}]^+$   $m/z$  calcd for  $\text{C}_{14}\text{H}_{17}\text{O}_3\text{PSNa}^+$  319.0528, found 319.0526.

***O,O*-diethyl *S*-(naphthalen-1-yl) phosphorothioate (4r, CAS Registry No. 1883501-39-0)**

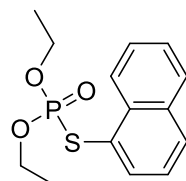

Light yellow oil; 38.8mg, 69% yield;  $^1\text{H NMR}$  ( $\text{CDCl}_3$ , 500 MHz):  $\delta$  8.53 (d,  $J = 8.5$  Hz, 1H),

7.94-7.83 (m, 3H), 7.60 (t,  $J = 7.6$  Hz, 1H), 7.53 (t,  $J = 7.5$  Hz, 1H), 7.45 (t,  $J = 7.7$  Hz, 1H), 4.20-4.04 (m, 4H), 1.18 (t,  $J = 7.1$  Hz, 6H);  $^{13}\text{C}\{^1\text{H}\}$  NMR ( $\text{CDCl}_3$ , 101 MHz):  $\delta$  135.45 (d,  $J = 5.6$  Hz), 134.94 (d,  $J = 4.1$  Hz), 134.50 (d,  $J = 2.3$  Hz), 130.51 (d,  $J = 3.5$  Hz), 128.74, 127.26, 126.67, 126.15, 125.88 (d,  $J = 3.4$  Hz), 123.97 (d,  $J = 8.1$  Hz), 64.44 (d,  $J = 6.6$  Hz), 16.15 (d,  $J = 7.2$  Hz);  $^{31}\text{P}\{^1\text{H}\}$  NMR ( $\text{CDCl}_3$ , 202 MHz):  $\delta$  22.61; HRMS:  $[\text{M}+\text{Na}]^+$   $m/z$  calcd for  $\text{C}_{14}\text{H}_{17}\text{O}_3\text{PSNa}^+$  319.0528, found 319.0530.

***O,O*-diethyl *S*-(thiophen-2-yl) phosphorothioate (4s, CAS Registry No. 2085285-68-1)**

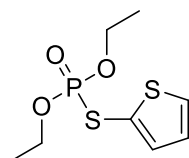

Brown oil; 29.3 mg, 58% yield;  $^1\text{H}$  NMR ( $\text{CDCl}_3$ , 500 MHz):  $\delta$  7.41 (dd,  $J = 5.7, 2.7$  Hz, 1H), 7.21 (d,  $J = 3.7$  Hz, 1H), 7.00 (dd,  $J = 5.4, 3.6$  Hz, 1H), 4.26-4.15 (m, 4H), 1.33 (t,  $J = 7.1$  Hz, 6H);  $^{13}\text{C}\{^1\text{H}\}$  NMR ( $\text{CDCl}_3$ , 126 MHz):  $\delta$  136.27 (d,  $J = 6.7$  Hz), 131.21 (d,  $J = 4.4$  Hz), 127.99 (d,  $J = 3.4$  Hz), 123.34 (d,  $J = 8.5$  Hz), 64.55 (d,  $J = 6.1$  Hz), 16.17 (d,  $J = 7.1$  Hz);  $^{31}\text{P}\{^1\text{H}\}$  NMR ( $\text{CDCl}_3$ , 242 MHz):  $\delta$  20.71; HRMS:  $[\text{M}+\text{Na}]^+$   $m/z$  calcd for  $\text{C}_8\text{H}_{13}\text{O}_3\text{PS}_2\text{Na}^+$  274.9936, found 274.9927.

***O,O*-diethyl *S*-(2-methylfuran-3-yl) phosphorothioate (4t, new compound)**

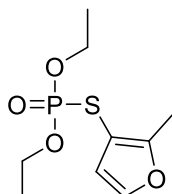

Brown oil; 25.1 mg, 50% yield;  $^1\text{H}$  NMR ( $\text{CDCl}_3$ , 500 MHz):  $\delta$  7.27 (d,  $J = 2.0$  Hz, 1H), 6.36 (d,  $J = 2.0$  Hz, 1H), 4.22-4.10 (m, 4H), 2.34 (d,  $J = 3.5$  Hz, 3H), 1.31 (t,  $J = 7.1$  Hz, 6H);  $^{13}\text{C}\{^1\text{H}\}$  NMR ( $\text{CDCl}_3$ , 126 MHz):  $\delta$  156.65 (d,  $J = 8.7$  Hz), 141.13, 115.41, 101.99 (d,  $J = 7.6$  Hz), 64.22 (d,  $J = 6.4$  Hz), 16.25 (d,  $J = 7.1$  Hz), 12.09 (d,  $J = 2.3$  Hz);  $^{31}\text{P}\{^1\text{H}\}$  NMR ( $\text{CDCl}_3$ , 202 MHz):  $\delta$  22.88; HRMS:  $[\text{M}+\text{Na}]^+$   $m/z$  calcd for  $\text{C}_9\text{H}_{15}\text{O}_4\text{PSNa}^+$  273.0321, found 273.0320.

***O,O*-dibutyl *S*-phenyl phosphorothioate (5a, CAS Registry No. 22946-78-7)**

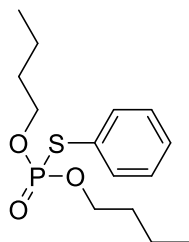

Light yellow oil; 54.4mg, 92% yield;  $^1\text{H}$  NMR ( $\text{CDCl}_3$ , 500 MHz):  $\delta$  7.59-7.52(m, 2H), 7.32(dt,  $J = 5.3, 2.6$  Hz 3H), 4.16-4.02 (m, 4H), 1.65-1.55 (m, 4H), 1.36-1.28 (m, 4H), 0.87 (t,  $J = 7.4$  Hz, 6H);  $^{13}\text{C}\{^1\text{H}\}$  NMR ( $\text{CDCl}_3$ , 126 MHz):  $\delta$  134.66 (d,  $J = 5.3$  Hz), 129.44 (d,  $J = 2.1$  Hz), 129.06 (d,  $J = 2.8$  Hz) 126.85 (d,  $J = 7.1$  Hz), 67.96 (d,  $J = 7.1$  Hz), 32.28(d,  $J = 6.9$  Hz), 18.80, 13.68;  $^{31}\text{P}\{^1\text{H}\}$  NMR ( $\text{CDCl}_3$ , 202 MHz):  $\delta$  22.95; HRMS:  $[\text{M}+\text{Na}]^+$   $m/z$  calcd for  $\text{C}_{14}\text{H}_{23}\text{O}_3\text{PSNa}^+$  325.0998, found 325.1000.

***O,O*-dipentyl *S*-phenyl phosphorothioate(5b, CAS Registry No. 195209-86-0)**

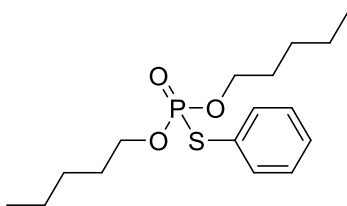

Light yellow oil; 59.4 mg, 86% yield;  $^1\text{H NMR}$  ( $\text{CDCl}_3$ , 500 MHz):  $\delta$  7.55 (dt,  $J = 7.6, 2.0$  Hz, 2H), 7.32 (dd,  $J = 5.3, 2.0$  Hz, 3H), 4.21-3.94 (m, 4H), 1.65-1.60 (m, 4H), 1.30-1.26 (m, 8H), 0.98-0.76 (m, 6H);  $^{13}\text{C}\{^1\text{H}\}$  NMR ( $\text{CDCl}_3$ , 126 MHz):  $\delta$  134.66 (d,  $J = 5.2$  Hz), 129.46 (d,  $J = 2.2$  Hz), 129.07 (d,  $J = 3.0$  Hz), 126.90 (d,  $J = 7.0$  Hz), 68.27 (d,  $J = 6.8$  Hz), 30.00 (d,  $J = 6.8$  Hz), 27.73, 22.33, 14.06;  $^{31}\text{P}\{^1\text{H}\}$  NMR ( $\text{CDCl}_3$ , 202 MHz):  $\delta$  22.92; HRMS:  $[\text{M}+\text{Na}]^+$   $m/z$  calcd for  $\text{C}_{16}\text{H}_{27}\text{O}_3\text{PSNa}^+$  353.1311, found 353.1308.

***O,O*-diheptyl *S*-phenyl phosphorothioate (5c, CAS Registry No. 2217636-00-3)**

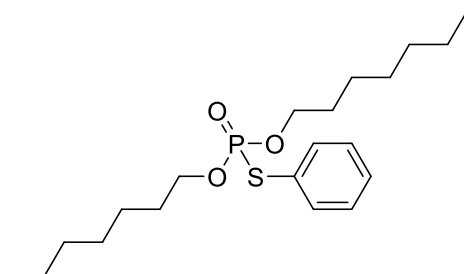

Light yellow oil; 70.5 mg, 87% yield;  $^1\text{H NMR}$  ( $\text{CDCl}_3$ , 500 MHz):  $\delta$  7.55 (dt,  $J = 7.6, 2.1$  Hz, 2H), 7.35-7.29 (m, 3H), 4.14-4.03 (m, 4H), 1.65-1.59 (m, 4H), 1.31-1.21 (m, 16H), 0.86 (t,  $J = 6.9$  Hz, 6H);  $^{13}\text{C}\{^1\text{H}\}$  NMR ( $\text{CDCl}_3$ , 126 MHz): 134.66 (d,  $J = 5.4$  Hz), 129.46 (d,  $J = 2.3$  Hz), 129.06 (d,  $J = 2.7$  Hz), 126.93 (d,  $J = 7.1$  Hz), 68.30 (d,  $J = 6.7$  Hz), 31.85, 30.33 (d,  $J = 7.1$  Hz), 28.94, 25.57, 22.71;  $^{31}\text{P}\{^1\text{H}\}$  NMR ( $\text{CDCl}_3$ , 242 MHz):  $\delta$  37.01 (d,  $J = 446.7$  Hz); HRMS:  $[\text{M}+\text{H}]^+$   $m/z$  calcd for  $\text{C}_{20}\text{H}_{35}\text{O}_3\text{PS}^+$  387.2117, found 387.2118.

***O,O*-didodecyl *S*-phenyl phosphorothioate (5d, new compound)**

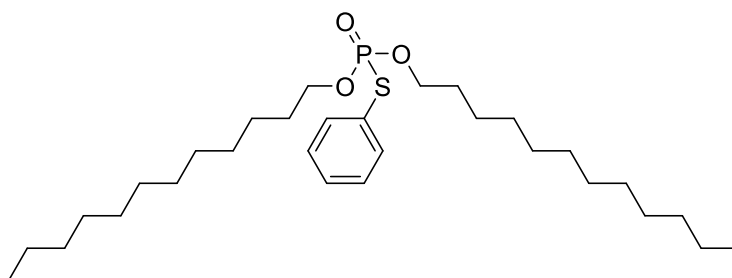

Light yellow oil; 94.8 mg, 90% yield;  $^1\text{H NMR}$  ( $\text{CDCl}_3$ , 500 MHz):  $\delta$  7.58-7.54 (m, 2H), 7.34-7.30 (m, 3H), 4.13-4.12 (m, 4H), 1.64-1.60 (m, 4H), 1.31-1.24 (m, 36H), 0.87 (t,  $J = 6.9$  Hz, 6H);  $^{13}\text{C}\{^1\text{H}\}$  NMR ( $\text{CDCl}_3$ , 126 MHz):  $\delta$  134.69 (d,  $J = 5.4$  Hz), 129.48 (d,  $J = 2.8$  Hz), 129.08 (d,  $J = 2.8$  Hz), 126.97 (d,  $J = 7.2$  Hz), 68.33 (d,  $J = 6.7$  Hz), 30.39, 30.34, 29.85, 29.84, 29.75, 29.69, 29.55, 29.32, 25.65, 22.89, 14.30;  $^{31}\text{P}\{^1\text{H}\}$  NMR ( $\text{CDCl}_3$ , 202 MHz):  $\delta$  22.92; HRMS:  $[\text{M}+\text{Na}]^+$   $m/z$  calcd for  $\text{C}_{30}\text{H}_{55}\text{O}_3\text{PNa}^+$  549.3502, found 549.3502.

**(2-isobutoxy-5-methyl-2H-hex-1-en-2-yl)(phenyl)sulfane (5e, CAS Registry No. 195209-88-2)**

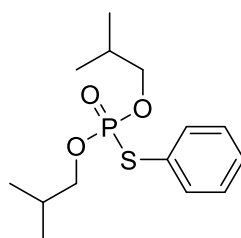

Light yellow oil; 38.7 mg, 64% yield;  $^1\text{H NMR}$  ( $\text{CDCl}_3$ , 500 MHz):  $\delta$  7.60-7.51 (m, 2H), 7.32 (d,  $J = 6.0$  Hz, 3H), 3.91-3.87 (m, 2H), 3.84-3.80 (m, 2H), 1.94-1.86 (m, 2H), 0.88 (d,  $J = 6.8$  Hz, 12H);  $^{13}\text{C}\{^1\text{H}\}$  NMR ( $\text{CDCl}_3$ , 126 MHz):  $\delta$  134.76 (d,  $J = 5.4$  Hz), 129.45 (d,  $J = 2.3$  Hz), 129.10 (d,  $J = 2.9$  Hz), 126.75 (d,  $J = 7.1$  Hz), 74.08 (d,  $J = 7.2$  Hz), 29.17 (d,  $J = 7.1$  Hz), 18.81;  $^{31}\text{P}\{^1\text{H}\}$  NMR ( $\text{CDCl}_3$ , 202 MHz):  $\delta$  22.83; HRMS:  $[\text{M}+\text{H}]^+$   $m/z$  calcd for  $\text{C}_{14}\text{H}_{25}\text{O}_3\text{PSNa}^+$  325.0998, found 325.0998.

***O,O*-bis(2-methylpentyl) *S*-phenyl phosphorothioate (5f, new compound)**

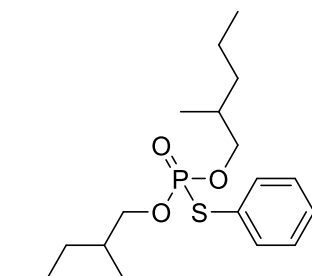

Light yellow oil; 60.9mg, 85% yield;  $^1\text{H NMR}$  ( $\text{CDCl}_3$ , 500 MHz):  $\delta$  7.58-7.55 (m, 2H), 7.34-7.29 (m, 3H), 4.02-3.81 (m, 4H), 1.76 (dt,  $J = 12.6, 6.2$  Hz, 2H), 1.37-1.21 (m, 6H), 1.12-1.04 (m, 2H), 0.91-0.83 (m, 12H);  $^{13}\text{C}\{^1\text{H}\}$  NMR ( $\text{CDCl}_3$ , 126 MHz):  $\delta$  134.71, (dt,  $J = 5.5, 2.8$  Hz), 129.43 (d,  $J = 2.2$  Hz), 129.05 (d,  $J = 3.1$  Hz), 126.88 (d,  $J = 7.0$  Hz), 72.91 (dd,  $J = 7.2, 1.9$  Hz), 35.19, 33.75 (d,  $J = 7.4$  Hz), 20.01, 16.59 (d,  $J = 3.5$  Hz), 14.36;  $^{31}\text{P}\{^1\text{H}\}$  NMR ( $\text{CDCl}_3$ , 202 MHz):  $\delta$  22.84; HRMS:  $[\text{M}+\text{Na}]^+$   $m/z$  calcd for  $\text{C}_{18}\text{H}_{31}\text{O}_3\text{PSNa}^+$  381.1624, found 381.1631.

***O,O*-bis(2-cyclohexylethyl) *S*-phenyl phosphorothioate (5g, new compound)**

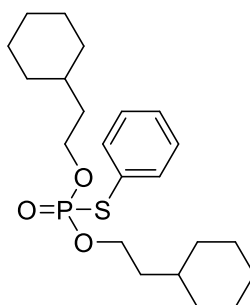

Light yellow oil; 63,2 mg, 77% yield;  $^1\text{H NMR}$  ( $\text{CDCl}_3$ , 500 MHz):  $\delta$  7.54 (dt,  $J = 7.5, 2.1$  Hz, 2H), 7.32 (dd,  $J = 5.2, 1.9$  Hz, 3H), 4.18-4.06 (m, 4H), 1.69-1.60 (m, 10H), 1.54-1.49 (m, 4H), 1.37-1.29 (m, 2H), 1.21-1.09 (m, 6H), 0.91-0.82 (m, 4H);  $^{13}\text{C}\{^1\text{H}\}$  NMR ( $\text{CDCl}_3$ , 126 MHz):  $\delta$  134.57 (d,  $J = 5.3$  Hz), 129.44 (d,  $J = 2.3$  Hz), 129.01 (d,  $J = 2.7$  Hz), 126.94 (d,  $J = 7.2$  Hz), 66.32 (d,  $J = 7.0$  Hz), 37.61 (d,  $J = 7.1$  Hz), 34.02, 33.16, 26.60, 26.28;  $^{31}\text{P}\{^1\text{H}\}$  NMR ( $\text{CDCl}_3$ , 202 MHz):  $\delta$  22.88; HRMS:  $[\text{M}+\text{Na}]^+$   $m/z$  calcd for  $\text{C}_{22}\text{H}_{35}\text{O}_3\text{PSNa}^+$  433.1937 found 433.1938.

***S*-phenyl *O,O*-bis(4-phenylbutyl) phosphorothioate (5h, new compound)**

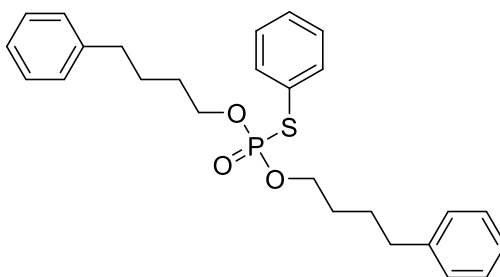

Light yellow oil; 81.6 mg, 89% yield;  $^1\text{H NMR}$  ( $\text{CDCl}_3$ , 500 MHz):  $\delta$  7.53 (dt,  $J = 8.1, 2.0$  Hz, 2H), 7.27(dt,  $J = 13.1, 5.3$  Hz, 7H), 7.17 (t,  $J = 7.2$  Hz, 2H), 7.13 (d,  $J = 7.4$  Hz, 4H), 4.17-4.04 (m, 4H), 2.59 (t,  $J = 7.0$  Hz, 4H), 1.66 (dq,  $J = 7.9, 4.6$  Hz, 8H);  $^{13}\text{C}\{^1\text{H}\}$  NMR ( $\text{CDCl}_3$ , 126MHz):  $\delta$  142.06, 134.70 (d,  $J = 5.4$  Hz), 129.53 (d,  $J = 2.3$  Hz), 129.16 (d,  $J = 2.8$  Hz), 128.60, 128.55, 128.53 (d,  $J = 4.5$  Hz), 126.80, 68.06 (d,  $J = 6.7$  Hz), 35.45, 29.87 (d,  $J = 7.2$  Hz), 27.38;  $^{31}\text{P}\{^1\text{H}\}$  NMR ( $\text{CDCl}_3$ , 202 MHz):  $\delta$  23.10; HRMS:  $[\text{M}+\text{Na}]^+$   $m/z$  calcd for  $\text{C}_{26}\text{H}_{31}\text{O}_3\text{PSNa}^+$  477.1624, found 477.1625.

***S*-phenyl *O,O*-bis(2-(thiophen-2-yl)ethyl) phosphorothioate (5i, new compound)**

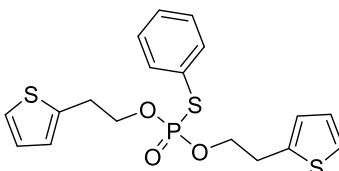

Light brown oil; 57.4 mg, 70% yield;  $^1\text{H NMR}$  ( $\text{CDCl}_3$ , 400 MHz):  $\delta$  7.51-7.45 (m, 2H), 7.38-7.28 (m, 3H), 7.16 (dd,  $J = 5.1, 1.2$  Hz, 2H), 6.94 (dd,  $J = 5.2, 3.4$  Hz, 2H), 6.83 (dd,  $J = 3.5, 1.1$  Hz, 2H), 4.36-4.22 (m, 4H), 3.14 (t,  $J = 6.8$  Hz, 4H);  $^{13}\text{C}\{^1\text{H}\}$  NMR ( $\text{CDCl}_3$ , 126 MHz):  $\delta$  138.91, 134.87 (d,  $J = 5.3$  Hz), 129.61 (d,  $J = 2.4$  Hz), 129.30 (d,  $J = 2.9$  Hz), 127.13, 126.11, 124.37, 68.13 (d,  $J = 6.8$  Hz), 30.90 (d,  $J = 7.6$  Hz);  $^{31}\text{P}\{^1\text{H}\}$  NMR ( $\text{CDCl}_3$ , 202 MHz):  $\delta$  23.24; HRMS:  $[\text{M}+\text{Na}]^+$   $m/z$  calcd for  $\text{C}_{18}\text{H}_{19}\text{O}_3\text{PS}_3\text{Na}^+$  433.0126, found 433.0130.

***O,O*-bis(9-chlorononyl) *S*-phenyl phosphorothioate (5j, new compound)**

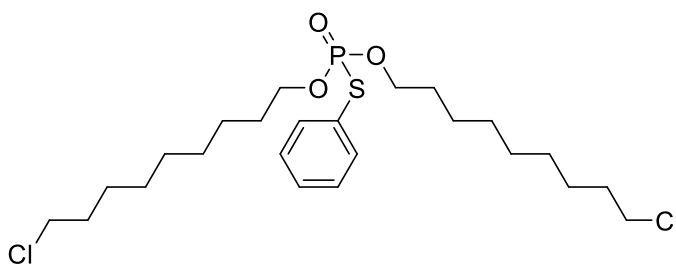

Light yellow oil; 70.3 mg, 66% yield;  $^1\text{H NMR}$  ( $\text{CDCl}_3$ , 500 MHz):  $\delta$  7.58-7.53 (m, 2H), 7.33 (d,  $J = 6.1$  Hz, 3H), 4.15-4.03 (m, 4H), 3.52 (d,  $J = 6.7$  Hz, 4H), 1.77-1.73 (m, 4H), 1.66-1.60 (m, 4H), 1.32-1.25 (m, 20H);  $^{13}\text{C}\{^1\text{H}\}$  NMR ( $\text{CDCl}_3$ , 126 MHz):  $\delta$  134.67 (d,  $J = 5.2$  Hz), 129.51 (d,  $J = 2.2$  Hz), 129.12 (d,  $J = 2.7$  Hz), 126.13 (d,  $J = 7.0$  Hz), 68.29 (d,  $J = 6.7$  Hz), 45.32, 32.82, 30.39 (d,  $J = 7.0$  Hz), 29.48, 29.18, 28.97, 27.04, 25.60;  $^{31}\text{P}\{^1\text{H}\}$  NMR ( $\text{CDCl}_3$ , 202 MHz):  $\delta$  22.98; HRMS:  $[\text{M}+\text{Na}]^+$   $m/z$  calcd for  $\text{C}_{24}\text{H}_{41}\text{Cl}_2\text{O}_3\text{PSNa}^+$  533.1783, found 533.1780.

**S-phenyl O,O-di(undec-10-en-1-yl) phosphorothioate (5k, new compound)**

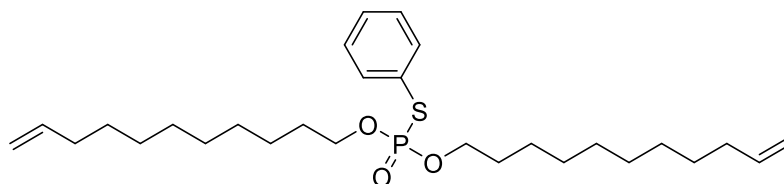

Light yellow oil; 41.3 mg, 40% yield;  $^1\text{H NMR}$  ( $\text{CDCl}_3$ , 500 MHz):  $\delta$  7.59-7.55 (m, 2H), 7.33 (d,  $J = 5.9$  Hz, 3H), 5.82-5.79 (m, 2H), 5.00-4.92 (m, 4H), 3.63(t,  $J = 5.9$  Hz 4H), 2.06-2.01 (m, 4H), 1.69-1.60 (m, 2H), 1.60-1.53 (m, 2H), 1.38-1.26 (m, 24H);  $^{13}\text{C}\{^1\text{H}\}$  NMR ( $\text{CDCl}_3$ , 126 MHz):  $\delta$  139.42 (d,  $J = 5.6$  Hz), 134.71 (d,  $J = 5.3$  Hz), 129.52 (d,  $J = 2.1$  Hz), 129.11 (d,  $J = 3.2$  Hz), 127.01 (d,  $J = 6.7$  Hz), 114.36 (d,  $J = 4.5$  Hz), 68.37 (d,  $J = 6.7$  Hz), 63.30, 34.02, 33.06, 30.39 (d,  $J = 6.9$  Hz), 29.65, 29.32, 25.98, 25.67;  $^{31}\text{P}\{^1\text{H}\}$  NMR ( $\text{CDCl}_3$ , 242 MHz):  $\delta$  22.94; HRMS:  $[\text{M}+\text{Na}]^+$  m/z calcd for  $\text{C}_{28}\text{H}_{47}\text{O}_3\text{PNa}^+$  517.2876, found 517.2875.

**O,O-diisopropyl S-phenyl phosphorothioate (5l, CAS Registry No. 15267-38-6)**

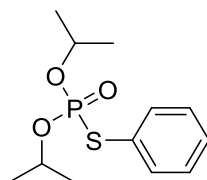

Light yellow oil; 48.3mg, 88% yield;  $^1\text{H NMR}$  ( $\text{CDCl}_3$ , 500 MHz):  $\delta$  7.61-7.56 (m, 2H), 7.35-7.32 (m, 3H), 4.82-4.72 (m, 2H), 1.30 (d,  $J = 6.2$  Hz, 6H), 1.23 (d,  $J = 6.2$  Hz, 6H),  $^{13}\text{C}\{^1\text{H}\}$  NMR ( $\text{CDCl}_3$ , 126 MHz):  $\delta$  134.39 (d,  $J = 5.6$  Hz), 129.32 (d,  $J = 1.8$  Hz), 128.82 (d,  $J = 2.7$  Hz), 127.50 (d,  $J = 7.2$  Hz), 73.48 (d,  $J = 6.8$  Hz), 23.64 (d,  $J = 5.7$  Hz);  $^{31}\text{P}\{^1\text{H}\}$  NMR ( $\text{CDCl}_3$ , 202 MHz):  $\delta$  20.42; HRMS:  $[\text{M}+\text{Na}]^+$  m/z calcd for  $\text{C}_{12}\text{H}_{19}\text{O}_3\text{PSNa}^+$  297.0685, found 297.0684.

**diethyl phenyl phosphate (7a, CAS Registry No. 2510-86-3)**

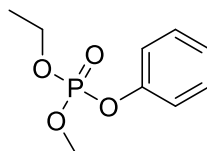

Light yellow oil; 31.3 mg, 68% yield;  $^1\text{H NMR}$  ( $\text{CDCl}_3$ , 400 MHz):  $\delta$  7.35-7.27 (m, 2H), 7.20 (dt,  $J = 8.7, 1.2$  Hz, 2H), 7.17-7.11(m, 1H), 4.21-4.14 (m, 4H), 1.33 (dt,  $J = 7.1, 1.1$  Hz, 6H);  $^{13}\text{C}\{^1\text{H}\}$  NMR ( $\text{CDCl}_3$ , 126MHz):  $\delta$  150.96 (d,  $J = 6.9$  Hz), 129.85, 125.12, 120.15 (d,  $J = 4.8$  Hz), 64.73 (d,  $J = 6.1$  Hz), 16.25 (d,  $J = 6.7$  Hz);  $^{31}\text{P}\{^1\text{H}\}$  NMR ( $\text{CDCl}_3$ , 202 MHz):  $\delta$  -6.31; HRMS:  $[\text{M}+\text{Na}]^+$  m/z calcd for  $\text{C}_{10}\text{H}_{15}\text{O}_4\text{PNa}^+$  253.0600, found 253.0599.

**[1,1'-biphenyl]-4-yl diethyl phosphate (7b, CAS Registry No. 37782-03-9)**

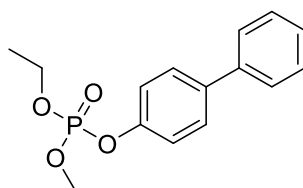

Light yellow oil; 36.1 mg, 59% yield;  $^1\text{H NMR}$  ( $\text{CDCl}_3$ , 400 MHz):  $\delta$  7.57-7.51 (m, 4H), 7.44-7.38

(m, 2H), 7.36-7.31 (m, 1H), 7.31-7.27 (m, 2H), 4.29-4.18 (m, 4H), 1.36 (t,  $J = 7.1$  Hz, 6H);  $^{13}\text{C}\{^1\text{H}\}$  NMR ( $\text{CDCl}_3$ , 101MHz):  $\delta$  150.40 (d,  $J = 7.0$  Hz), 140.36, 138.25, 128.94, 128.51, 127.45, 127.13, 120.40 (d,  $J = 5.1$  Hz), 64.77 (d,  $J = 6.1$  Hz), 16.25 (d,  $J = 6.7$  Hz);  $^{31}\text{P}\{^1\text{H}\}$  NMR ( $\text{CDCl}_3$ , 202 MHz):  $\delta$  -6.28; HRMS:  $[\text{M}+\text{Na}]^+$   $m/z$  calcd for  $\text{C}_{16}\text{H}_{19}\text{O}_4\text{PNa}^+$  329.0913, found 329.0907.

#### 4-(*tert*-butyl)phenyl diethyl phosphate (7c, CAS Registry No. 13538-40-4)

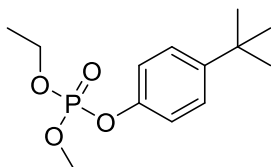

Light yellow oil; 40.5 mg, 66% yield;  $^1\text{H}$  NMR ( $\text{CDCl}_3$ , 500 MHz):  $\delta$  7.36-7.28 (m, 2H), 7.14-7.07 (m, 2H), 4.24-4.15 (m, 4H), 1.34 (t,  $J = 7.1$  Hz, 6H), 1.28 (s, 9H);  $^{13}\text{C}\{^1\text{H}\}$  NMR ( $\text{CDCl}_3$ , 126 MHz):  $\delta$  148.63 (d,  $J = 7.0$  Hz), 147.96, 126.70, 119.50 (d,  $J = 4.8$  Hz), 64.64 (d,  $J = 6.0$  Hz), 34.54, 31.58, 16.27 (d,  $J = 6.7$  Hz);  $^{31}\text{P}\{^1\text{H}\}$  NMR ( $\text{CDCl}_3$ , 202 MHz):  $\delta$  -6.05; HRMS:  $[\text{M}+\text{Na}]^+$   $m/z$  calcd for  $\text{C}_{14}\text{H}_{23}\text{O}_4\text{PNa}^+$  309.1226, found 309.1226.

#### 4-(benzyloxy)phenyl diethyl phosphate (7d, CAS Registry No. 57991-82-9)

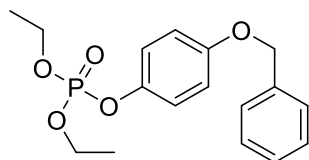

Pale yellow oil; 28.3 mg, 42% yield;  $^1\text{H}$  NMR ( $\text{CDCl}_3$ , 400 MHz):  $\delta$  7.43-7.35 (m, 4H), 7.34-7.31 (m, 1H), 7.16-7.10 (m, 2H), 6.94-6.89 (m, 2H), 5.02 (s, 2H), 4.25-4.15 (m, 4H), 1.34 (t,  $J = 7.0$  Hz, 6H);  $^{13}\text{C}\{^1\text{H}\}$  NMR ( $\text{CDCl}_3$ , 101MHz):  $\delta$  156.05, 144.76 (d,  $J = 7.1$  Hz), 137.01, 128.77, 128.20, 127.63, 121.09 (d,  $J = 4.6$  Hz), 115.88, 70.66, 64.68 (d,  $J = 6.1$  Hz), 16.28 (d,  $J = 6.7$  Hz);  $^{31}\text{P}\{^1\text{H}\}$  NMR ( $\text{CDCl}_3$ , 202 MHz):  $\delta$  -5.97; HRMS:  $[\text{M}+\text{Na}]^+$   $m/z$  calcd for  $\text{C}_{17}\text{H}_{21}\text{O}_5\text{PNa}^+$  359.1019, found 359.1021.

#### diethyl (4-(trifluoromethyl)phenyl) phosphate (7e, CAS Registry No.1454305-46-4)

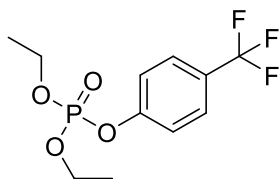

Pale yellow oil; 20.3 mg, 34% yield;  $^1\text{H}$  NMR ( $\text{CDCl}_3$ , 400 MHz):  $\delta$  7.60 (d,  $J = 8.5$  Hz, 2H), 7.32 (d,  $J = 8.4$  Hz, 2H), 4.27-4.17 (m, 4H), 1.35 (t,  $J = 7.1$  Hz, 6H);  $^{13}\text{C}\{^1\text{H}\}$  NMR ( $\text{CDCl}_3$ , 126MHz):  $\delta$  153.51 (d,  $J = 6.2$  Hz), 127.23 (q,  $J = 32.0$  Hz), 127.11 (dq,  $J = 3.8, 1.1$  Hz), 123.85 (q,  $J = 271.6$  Hz), 120.30 (d,  $J = 5.2$  Hz), 64.89 (d,  $J = 6.4$  Hz), 16.04 (d,  $J = 6.7$  Hz);  $^{31}\text{P}\{^1\text{H}\}$  NMR ( $\text{CDCl}_3$ , 202 MHz):  $\delta$  -6.72;  $^{19}\text{F}\{^1\text{H}\}$  NMR ( $\text{CDCl}_3$ , 377 MHz):  $\delta$  -62.34; HRMS:  $[\text{M}+\text{Na}]^+$   $m/z$  calcd for  $\text{C}_{27}\text{H}_{33}\text{OPNa}^+$  427.2161, found 427.2154.

**diethyl naphthalen-2-yl phosphate (7f, CAS Registry No. 16519-26-9)**

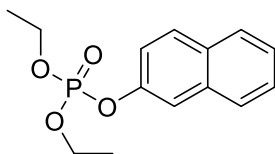

Pale yellow oil; 32.0 mg, 57% yield;  $^1\text{H NMR}$  ( $\text{CDCl}_3$ , 600 MHz):  $\delta$  7.85-7.76 (m, 3H), 7.69 (s, 1H), 7.50-7.41 (m, 2H), 7.39-7.34 (m, 1H), 4.30-4.20 (m, 4H), 1.36 (t,  $J = 7.1\text{ Hz}$ , 6H);  $^{13}\text{C}\{^1\text{H}\}$  NMR ( $\text{CDCl}_3$ , 126 MHz):  $\delta$  148.55 (d,  $J = 7.0\text{ Hz}$ ), 134.06, 131.06, 130.00, 127.87, 127.70, 126.87, 125.62, 120.21 (d,  $J = 7.0\text{ Hz}$ ), 116.55 (d,  $J = 4.9\text{ Hz}$ ), 64.86 (d,  $J = 6.0\text{ Hz}$ ), 16.29 (d,  $J = 6.7\text{ Hz}$ );  $^{31}\text{P}\{^1\text{H}\}$  NMR ( $\text{CDCl}_3$ , 202 MHz):  $\delta$  -6.25; HRMS:  $[\text{M}+\text{Na}]^+$   $m/z$  calcd for  $\text{C}_{14}\text{H}_{17}\text{O}_4\text{PNa}^+$  303.0756, found 303.0757.

**benzo[d][1,3]dioxol-5-yl diethyl phosphate (7g, CAS Registry No. 5460-52-6)**

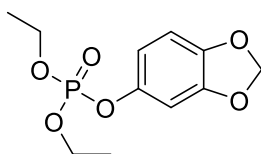

Yellow oil; 34.0 mg, 62% yield;  $^1\text{H NMR}$  ( $\text{CDCl}_3$ , 400 MHz):  $\delta$  6.67-6.63 (m, 3H), 5.93 (s, 2H), 4.23-4.13 (m, 4H), 1.33 (t,  $J = 7.1\text{ Hz}$ , 6H);  $^{13}\text{C}\{^1\text{H}\}$  NMR ( $\text{CDCl}_3$ , 101 MHz):  $\delta$  148.28, 145.35 (d,  $J = 7.1\text{ Hz}$ ), 144.90, 112.56 (d,  $J = 5.0\text{ Hz}$ ), 108.16, 102.68 (d,  $J = 4.7\text{ Hz}$ ), 101.86, 64.75 (d,  $J = 6.1\text{ Hz}$ ), 16.27 (d,  $J = 6.7\text{ Hz}$ );  $^{31}\text{P}\{^1\text{H}\}$  NMR ( $\text{CDCl}_3$ , 202 MHz):  $\delta$  -5.90; HRMS:  $[\text{M}+\text{Na}]^+$   $m/z$  calcd for  $\text{C}_{11}\text{H}_{15}\text{O}_6\text{PNa}^+$  297.0498, found 297.0496.

**diethyl ((8*R*,9*S*,13*S*,14*S*)-13-methyl-17-oxo-7,8,9,11,12,13,14,15,16,17-decahydro-6H-cyclopenta[*a*]phenanthren-3-yl) phosphate (7h, CAS Registry No. 2529-44-4)**

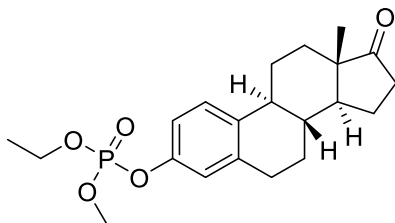

Light yellow oil; 46.3 mg, 57% yield;  $^1\text{H NMR}$  ( $\text{CDCl}_3$ , 400 MHz):  $\delta$  7.21 (d,  $J = 8.4\text{ Hz}$ , 1H), 7.00-6.91 (m, 2H), 4.26-4.13 (m, 4H), 2.88 (dd,  $J = 9.1, 4.3\text{ Hz}$ , 2H), 2.52-2.45 (m, 1H), 2.40-2.33 (m, 1H), 2.27-2.20 (m, 1H), 2.17-1.92 (m, 4H), 1.66-1.41 (m, 6H), 1.35 (t,  $J = 7.1\text{ Hz}$ , 6H), 0.89 (s, 3H);  $^{13}\text{C}\{^1\text{H}\}$  NMR ( $\text{CDCl}_3$ , 126 MHz):  $\delta$  220.93, 148.84 (d,  $J = 7.1\text{ Hz}$ ), 138.46, 136.65, 126.74, 120.11 (d,  $J = 4.6\text{ Hz}$ ), 117.34 (d,  $J = 4.8\text{ Hz}$ ), 64.66 (d,  $J = 6.1\text{ Hz}$ ), 50.60, 48.12, 44.23, 38.23, 36.03, 31.72, 29.60, 26.51, 25.97, 21.76, 16.30 (d,  $J = 6.6\text{ Hz}$ ), 14.01;  $^{31}\text{P}\{^1\text{H}\}$  NMR ( $\text{CDCl}_3$ , 202 MHz):  $\delta$  -6.07; HRMS:  $[\text{M}+\text{Na}]^+$   $m/z$  calcd for  $\text{C}_{22}\text{H}_{31}\text{O}_5\text{PNa}^+$  429.1801, found 429.1801.



**[1,1'-biphenyl]-4-yl bis(3-methylbut-3-en-1-yl) phosphate (7i, new compound)**

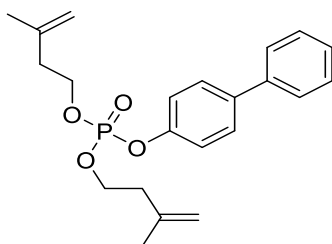

Light yellow oil; 49.4 mg, 64% yield;  $^1\text{H NMR}$  ( $\text{CDCl}_3$ , 400 MHz):  $\delta$  7.55 (dt,  $J = 7.1, 1.3$  Hz, 4H), 7.46-7.40 (m, 2H), 7.37-7.32 (m, 1H), 7.31-7.27 (m, 2H), 4.84 (s, 2H), 4.77 (s, 2H), 4.31-4.22 (m, 4H), 2.43 (t,  $J = 6.9$  Hz, 4H), 1.75 (s, 6H);  $^{13}\text{C}\{^1\text{H}\}$  NMR ( $\text{CDCl}_3$ , 126 MHz):  $\delta$  150.39 (d,  $J = 6.9$  Hz), 140.98, 140.45, 138.40, 129.02, 128.57, 127.53, 127.22, 120.51 (d,  $J = 4.9$  Hz), 113.09, 66.85 (d,  $J = 6.3$  Hz), 38.40 (d,  $J = 7.0$  Hz), 22.64;  $^{31}\text{P}\{^1\text{H}\}$  NMR ( $\text{CDCl}_3$ , 202 MHz):  $\delta$  -6.24; HRMS:  $[\text{M}+\text{Na}]^+$   $m/z$  calcd for  $\text{C}_{22}\text{H}_{27}\text{O}_4\text{PNa}^+$  409.1539, found 409.1539.

***O*-ethyl *O*, *S*-diphenyl phosphorothioate (8a, CAS Registry No. 51350-42-6)**

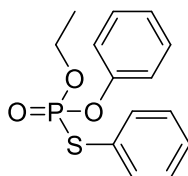

Pale yellow oil; 47.0 mg, 80% yield;  $^1\text{H NMR}$  ( $\text{CDCl}_3$ , 600 MHz):  $\delta$  7.56-7.48 (m, 2H), 7.41-7.28 (m, 5H), 7.21-7.13 (m, 3H), 4.31-4.26 (m, 2H), 1.35 (t,  $J = 7.1$  Hz, 3H);  $^{13}\text{C}\{^1\text{H}\}$  NMR ( $\text{CDCl}_3$ , 150 MHz):  $\delta$  150.62 (d,  $J = 7.9$  Hz), 135.17 (d,  $J = 5.6$  Hz), 129.89, 129.61 (d,  $J = 2.4$  Hz), 129.53 (d,  $J = 2.9$  Hz), 125.90 (d,  $J = 7.3$  Hz), 125.50, 120.62 (d,  $J = 5.1$  Hz), 65.05 (d,  $J = 5.8$  Hz), 16.22 (d,  $J = 7.2$  Hz);  $^{31}\text{P}\{^1\text{H}\}$  NMR ( $\text{CDCl}_3$ , 242 MHz):  $\delta$  19.13; HRMS:  $[\text{M}+\text{Na}]^+$   $m/z$  calcd for  $\text{C}_{14}\text{H}_{15}\text{O}_3\text{PSNa}^+$  317.0372, found 317.0371.

***O*-ethyl *O*-((8*R*,9*S*,13*S*,14*S*)-13-methyl-17-oxo-7,8,9,11,12,13,14,15,16,17-decahydro-6*H*-cyclopenta[*a*]phenanthren-3-yl) *S*-phenyl phosphorothioate (8b, new compound)**

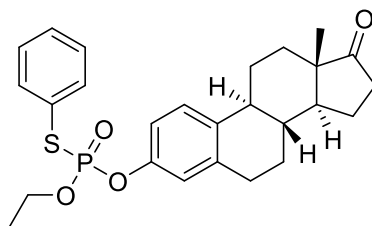

Pale yellow oil; 65.9 mg, 70% yield;  $^1\text{H NMR}$  ( $\text{CDCl}_3$ , 400 MHz):  $\delta$  7.56-7.53 (m, 2H), 7.40-7.30 (m, 3H), 7.21 (d,  $J = 8.5$  Hz, 1H), 6.93-6.89 (m, 2H), 4.34-4.24 (m, 2H), 2.88-2.84 (m, 2H), 2.55-2.47 (m, 1H), 2.41-2.36 (m, 1H), 2.19-1.95 (m, 5H), 1.61-1.44 (m, 6H), 1.34 (t,  $J = 7.1$  Hz, 3H), 0.91 (s, 3H);  $^{13}\text{C}\{^1\text{H}\}$  NMR ( $\text{CDCl}_3$ , 101 MHz):  $\delta$  220.97, 148.42 (d,  $J = 8.3$  Hz), 138.47, 137.02, 135.07 (d,  $J = 5.4$  Hz), 129.52 (d,  $J = 2.5$  Hz), 129.42 (d,  $J = 3.1$  Hz), 126.70, 126.00 (d,  $J = 7.5$  Hz), 120.52 (d,  $J = 4.8$  Hz), 117.76 (d,  $J = 4.9$  Hz), 65.00 (d,  $J = 6.6$  Hz), 50.57, 48.09, 44.20, 38.16, 36.00, 31.69, 29.54, 26.45, 25.90, 21.73, 16.17 (d,  $J = 7.1$  Hz), 13.99;  $^{31}\text{P}\{^1\text{H}\}$  NMR ( $\text{CDCl}_3$ , 242 MHz):  $\delta$  18.57; HRMS:  $[\text{M}+\text{Na}]^+$   $m/z$  calcd for  $\text{C}_{26}\text{H}_{31}\text{O}_4\text{PSNa}^+$  493.1573, found 493.1575.

**triphenyl phosphorotrithioite (9, CAS Registry No. 1095-04-1)**

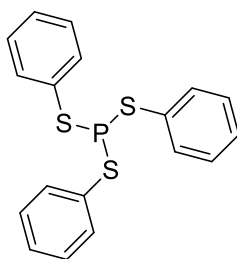

White solid;  $^1\text{H NMR}$  ( $\text{CDCl}_3$ , 500 MHz):  $\delta$  7.49-7.46 (m, 6H), 7.31-7.28 (m, 9H);  $^{13}\text{C}\{^1\text{H}\}$  NMR ( $\text{CDCl}_3$ , 126 MHz):  $\delta$  134.41 (d,  $J = 4.6$  Hz), 132.31 (d,  $J = 12.7$  Hz), 129.36, 128.69 (d,  $J = 2.1$  Hz);  $^{31}\text{P}\{^1\text{H}\}$  NMR ( $\text{CDCl}_3$ , 202 MHz):  $\delta$  132.31; HRMS:  $[\text{M}+\text{Na}]^+$   $m/z$  calcd for  $\text{C}_{18}\text{H}_{15}\text{O}_3\text{PS}_3\text{Na}^+$  380.9965, found 380.9965.

***O*-ethyl *S, S*-diphenyl phosphorodithioite (10, CAS Registry No. 28204-36-6)**

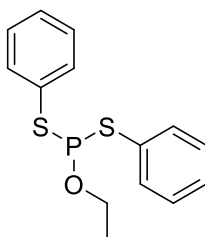

Colorless oil;  $^1\text{H NMR}$  ( $\text{CDCl}_3$ , 500 MHz):  $\delta$  7.55-7.53 (m, 4H), 7.34-7.29 (m, 6H), 4.20-4.14 (m, 2H), 1.28 (t,  $J = 7.0$  Hz, 3H);  $^{13}\text{C}\{^1\text{H}\}$  NMR ( $\text{CDCl}_3$ , 126 MHz):  $\delta$  133.50, 133.45, 129.49, 128.15 (d,  $J = 1.8$  Hz), 62.09 (d,  $J = 9.2$  Hz), 16.51 (d,  $J = 2.6$  Hz);  $^{31}\text{P}\{^1\text{H}\}$  NMR ( $\text{CDCl}_3$ , 202 MHz):  $\delta$  157.52; HRMS:  $[\text{M}+\text{Na}]^+$   $m/z$  calcd for  $\text{C}_{14}\text{H}_{15}\text{OPS}_2\text{Na}^+$  317.0194, found 317.0195.

## 7. Supplementary Reference

1. Y. Liu, J. Kim, H. Seo, S. Park and J. Chae, *Adv. Synth. Catal.*, 2015, **357**, 2205-2212.
2. X. Qiu, X. Yang, Y. Zhang, S. Song and N. Jiao, *Org. Chem. Front.*, 2019, **6**, 2220-2225.

## 8. NMR spectrum of isolated products.

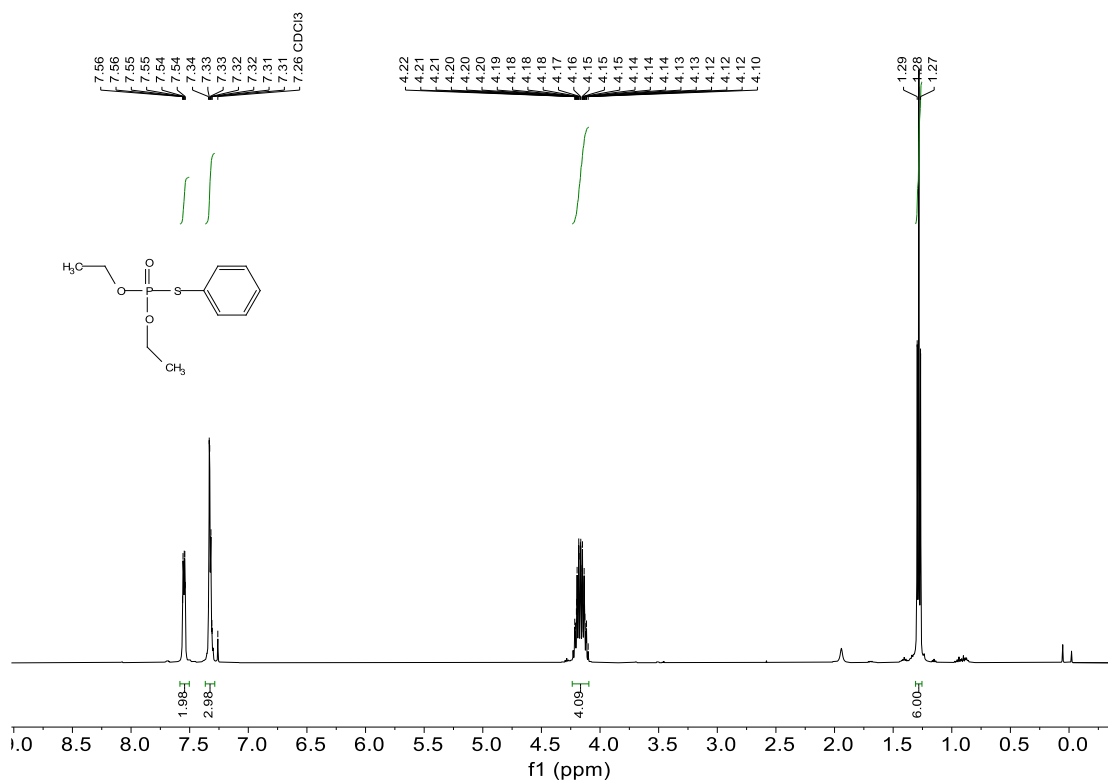

<sup>1</sup>H NMR (500 MHz, CDCl<sub>3</sub>) spectrum of compound **4a**

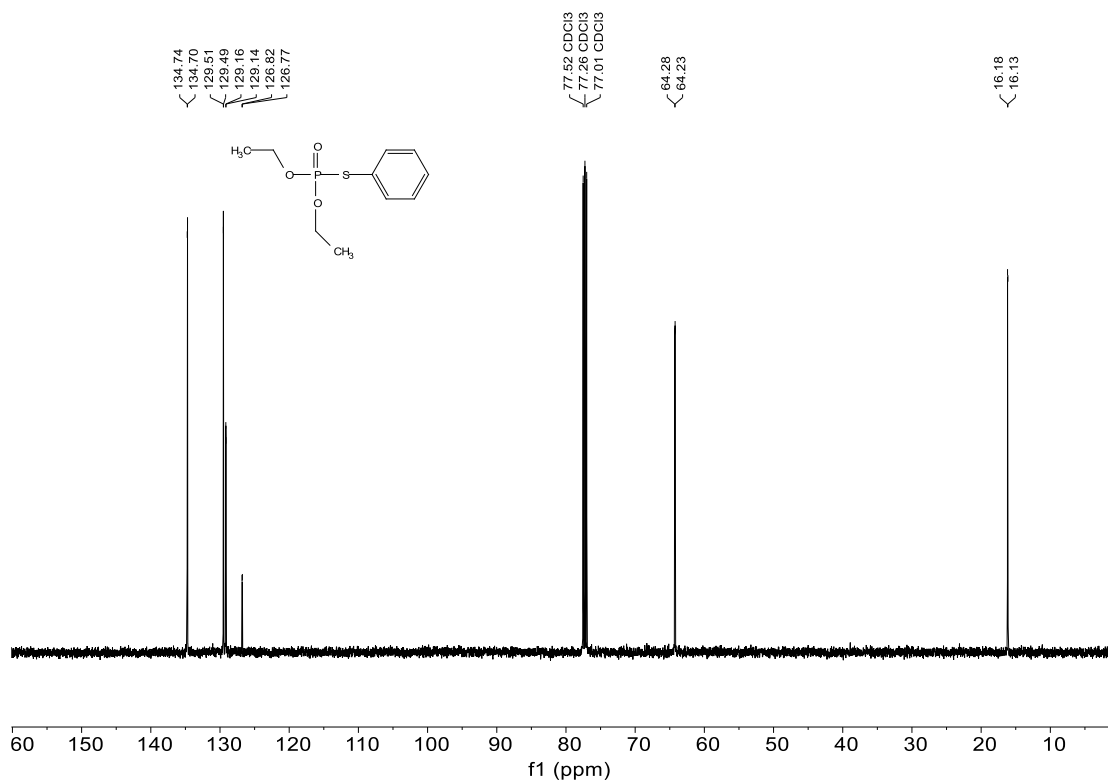

<sup>13</sup>C {<sup>1</sup>H} NMR (126 MHz, CDCl<sub>3</sub>) spectrum of compound **4a**

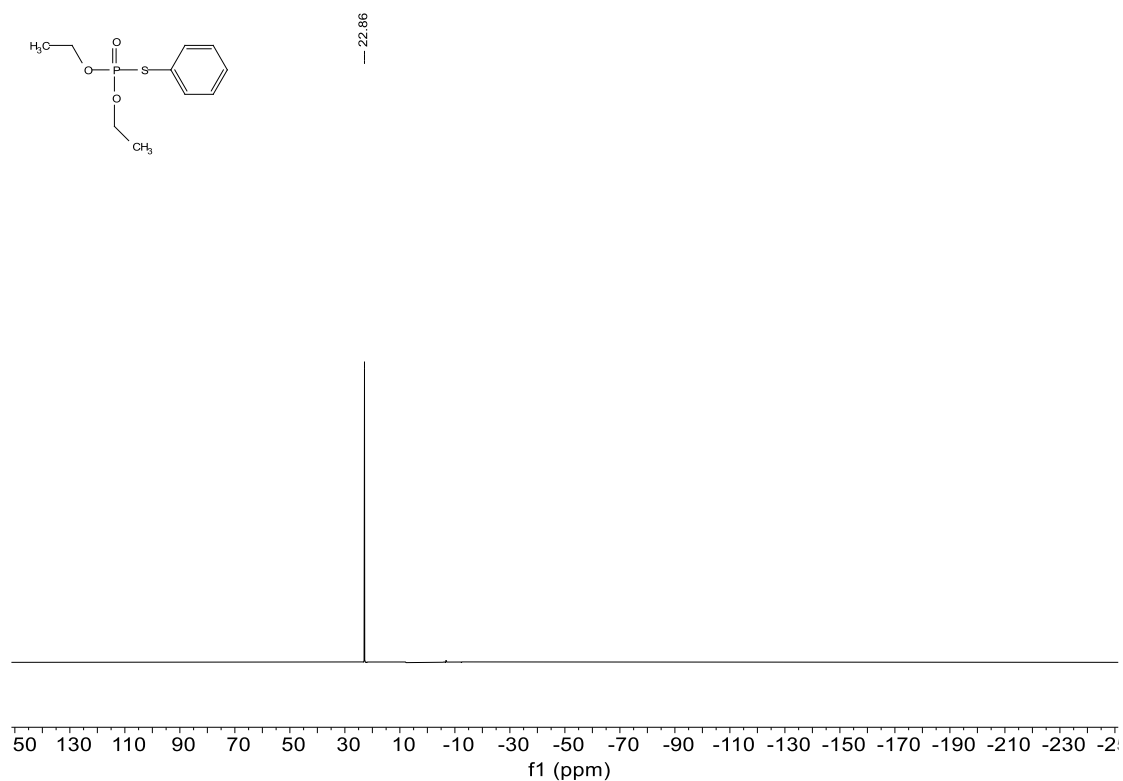

$^{31}\text{P}\{^1\text{H}\}$  NMR (202 MHz,  $\text{CDCl}_3$ ) spectrum of compound **4a**

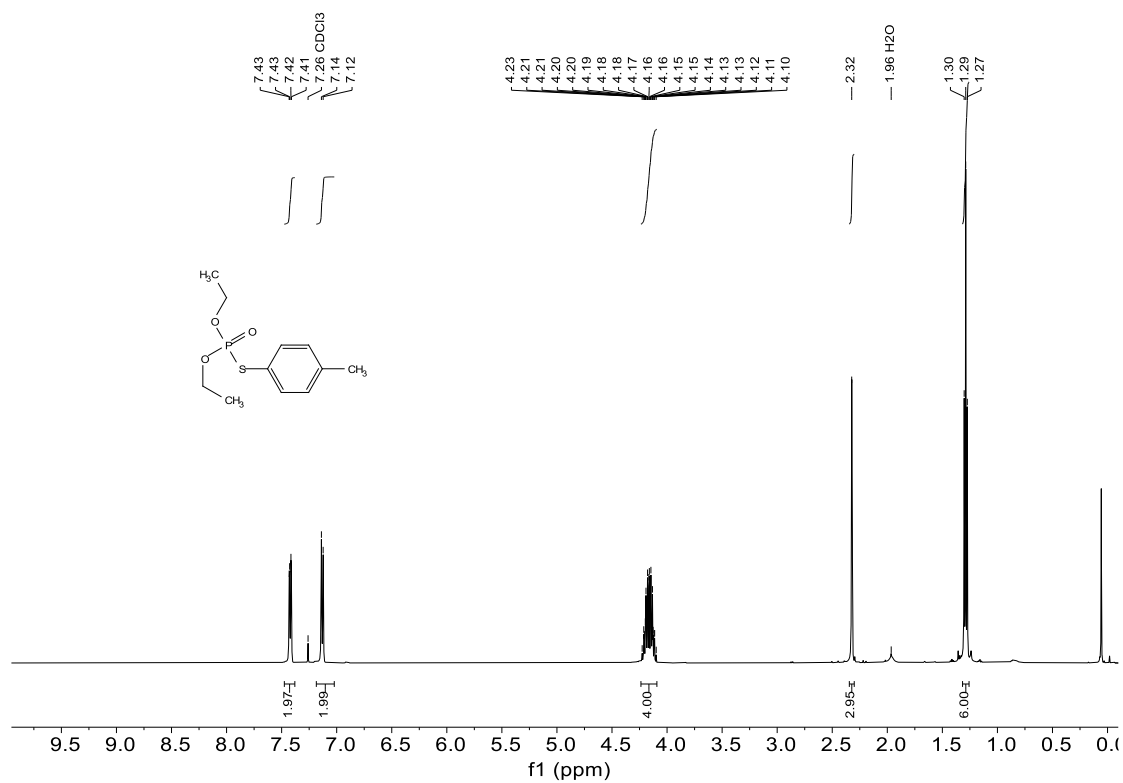

$^1\text{H}$  NMR (500 MHz,  $\text{CDCl}_3$ ) spectrum of compound **4b**

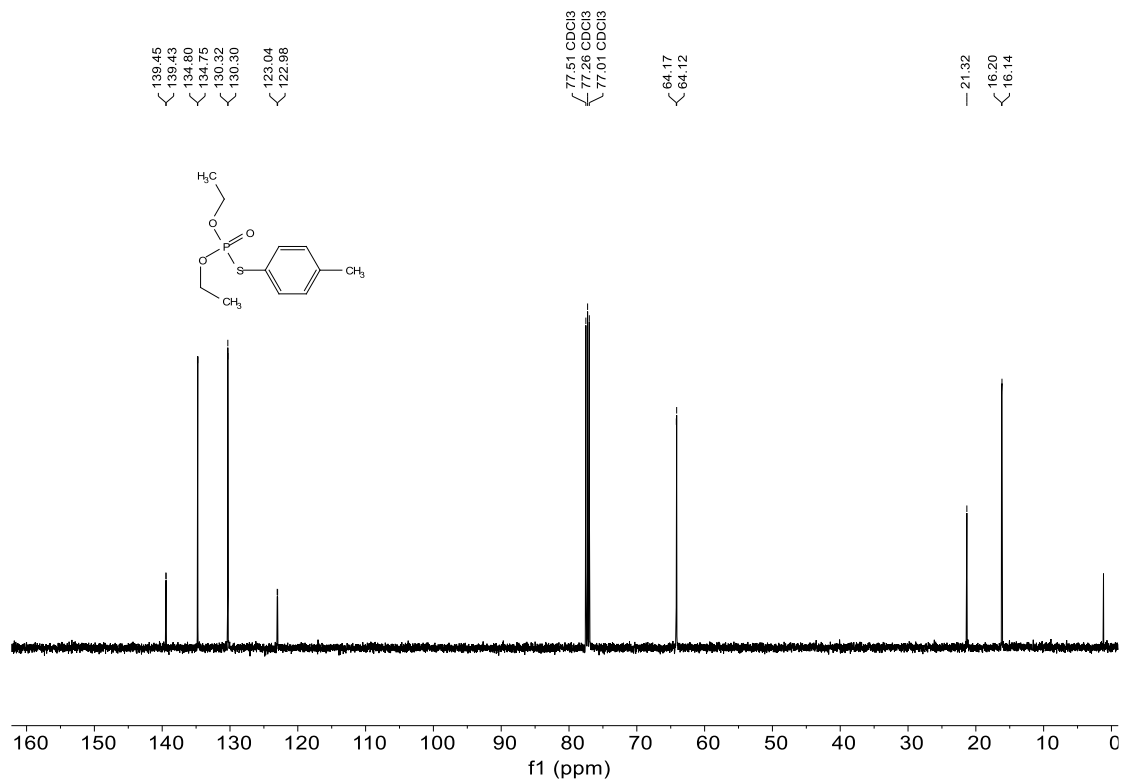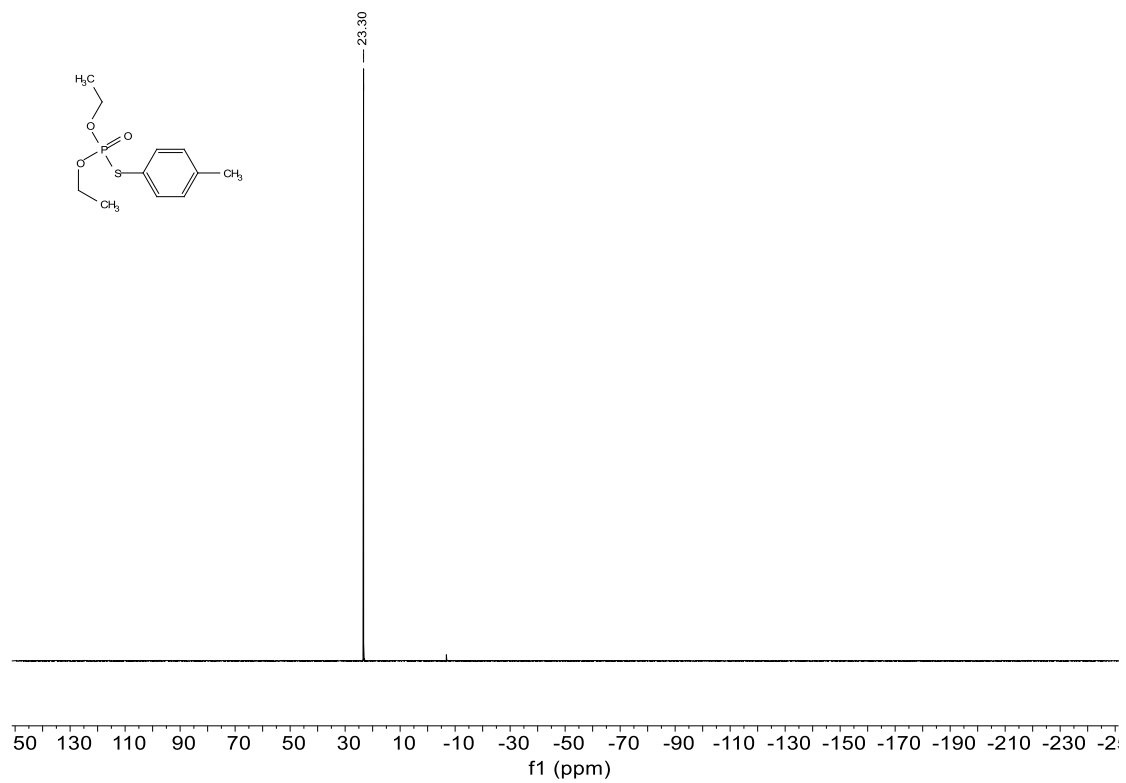

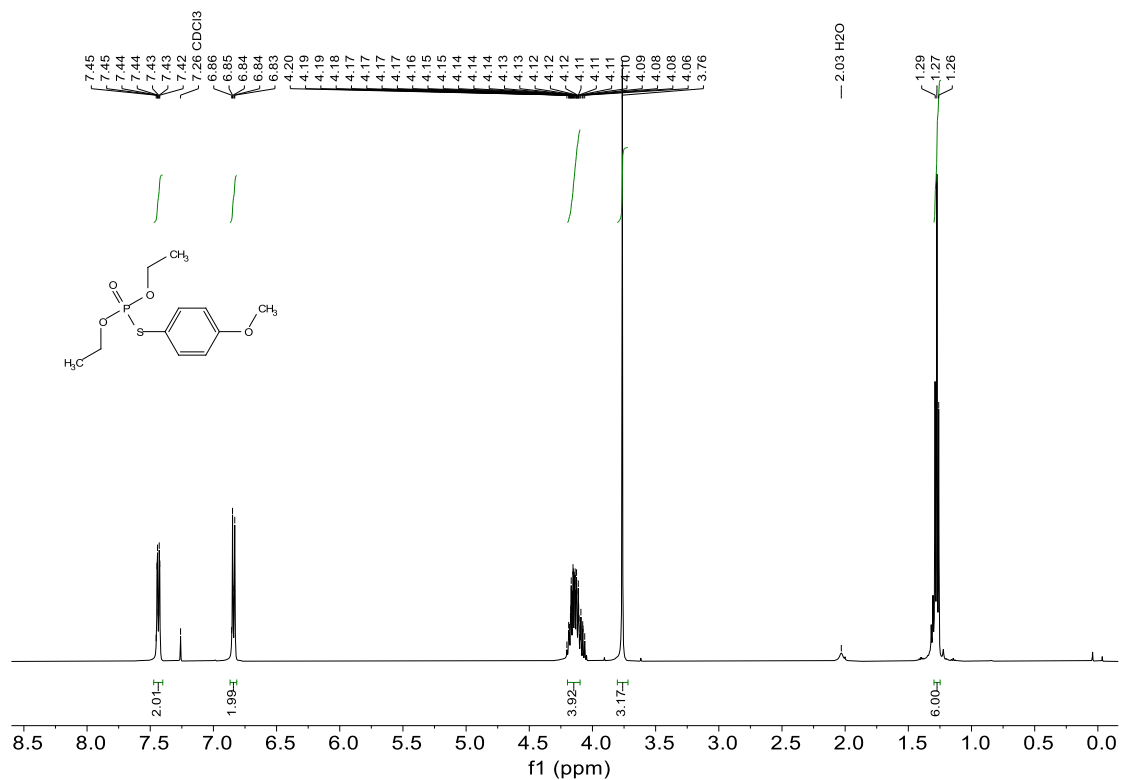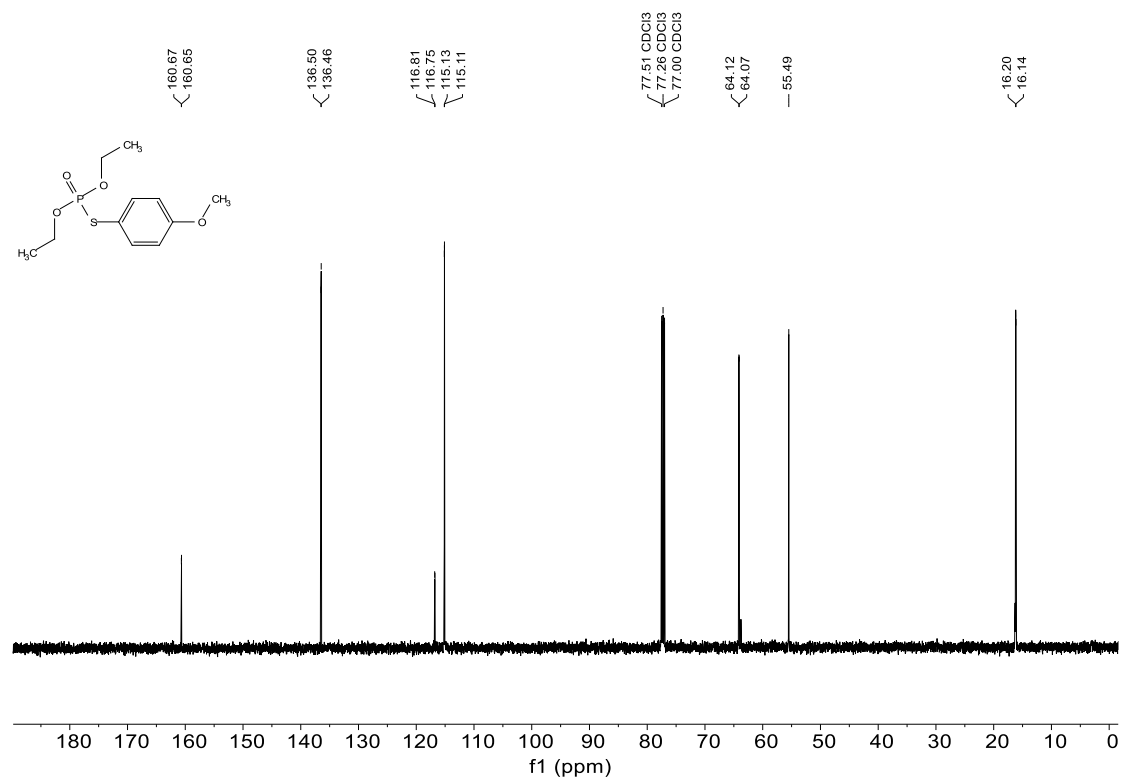

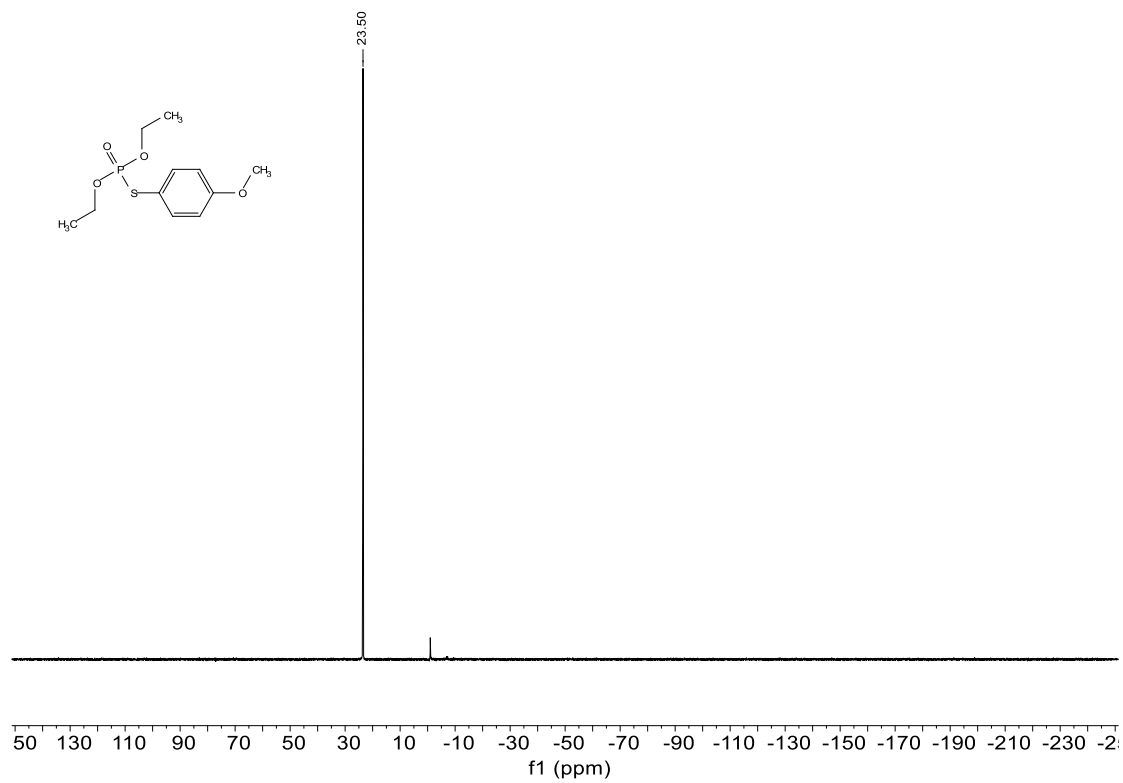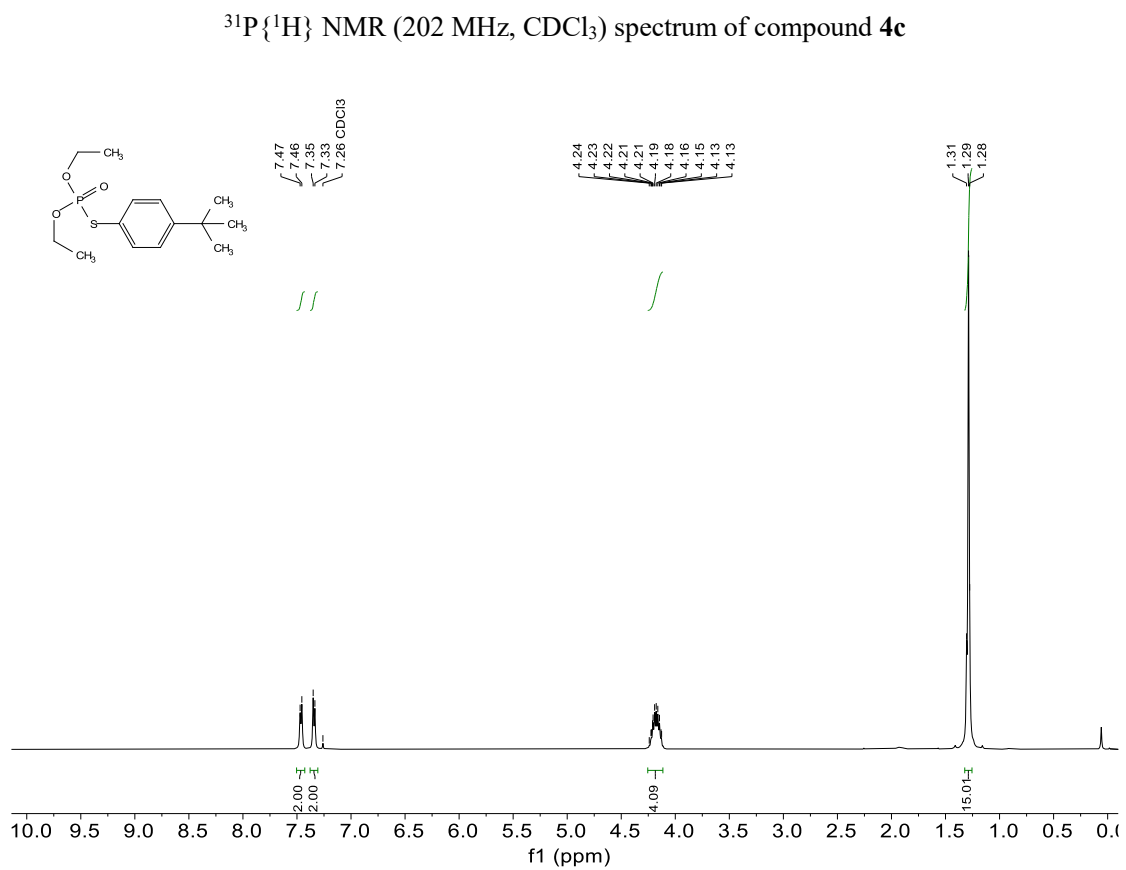

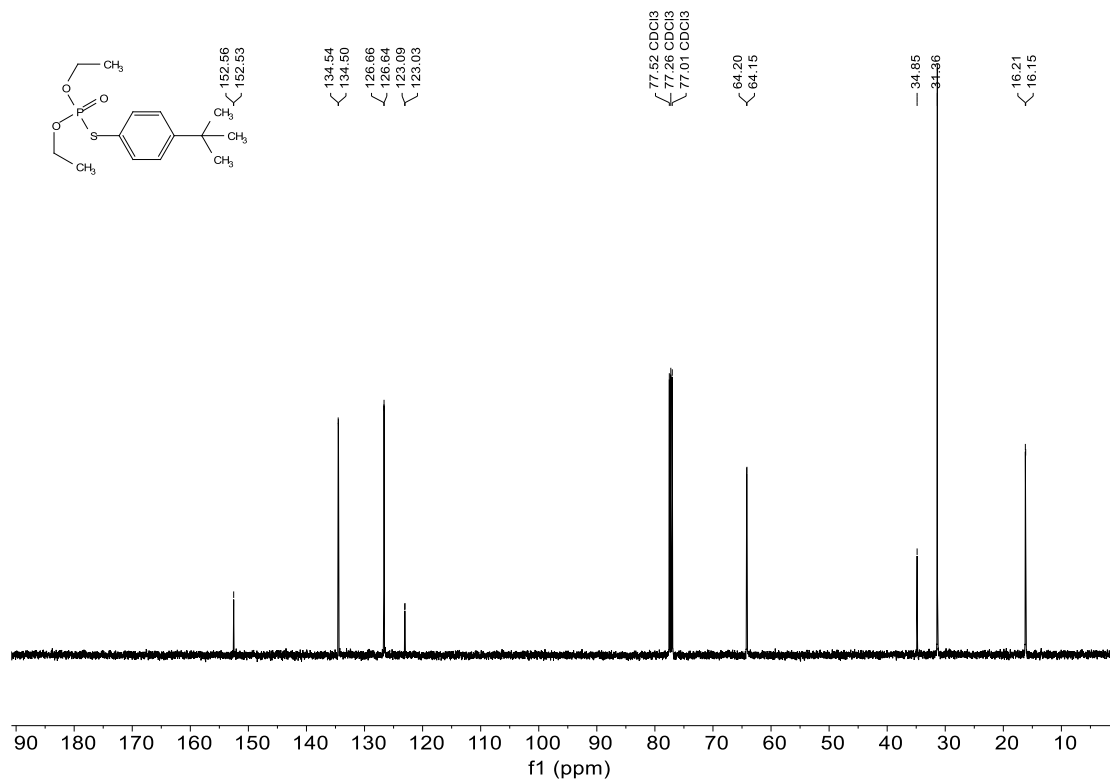

$^{13}\text{C}\{^1\text{H}\}$  NMR (126 MHz,  $\text{CDCl}_3$ ) spectrum of compound **4d**

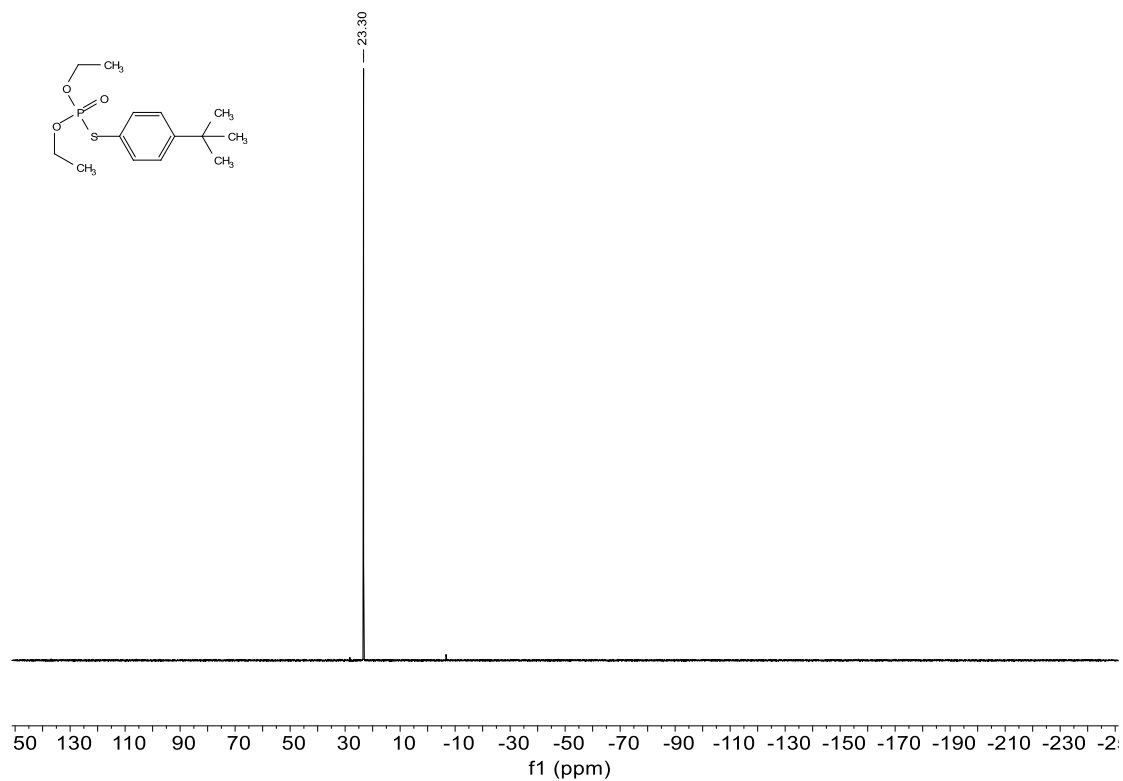

$^{31}\text{P}\{^1\text{H}\}$  NMR (202 MHz,  $\text{CDCl}_3$ ) spectrum of compound **4d**



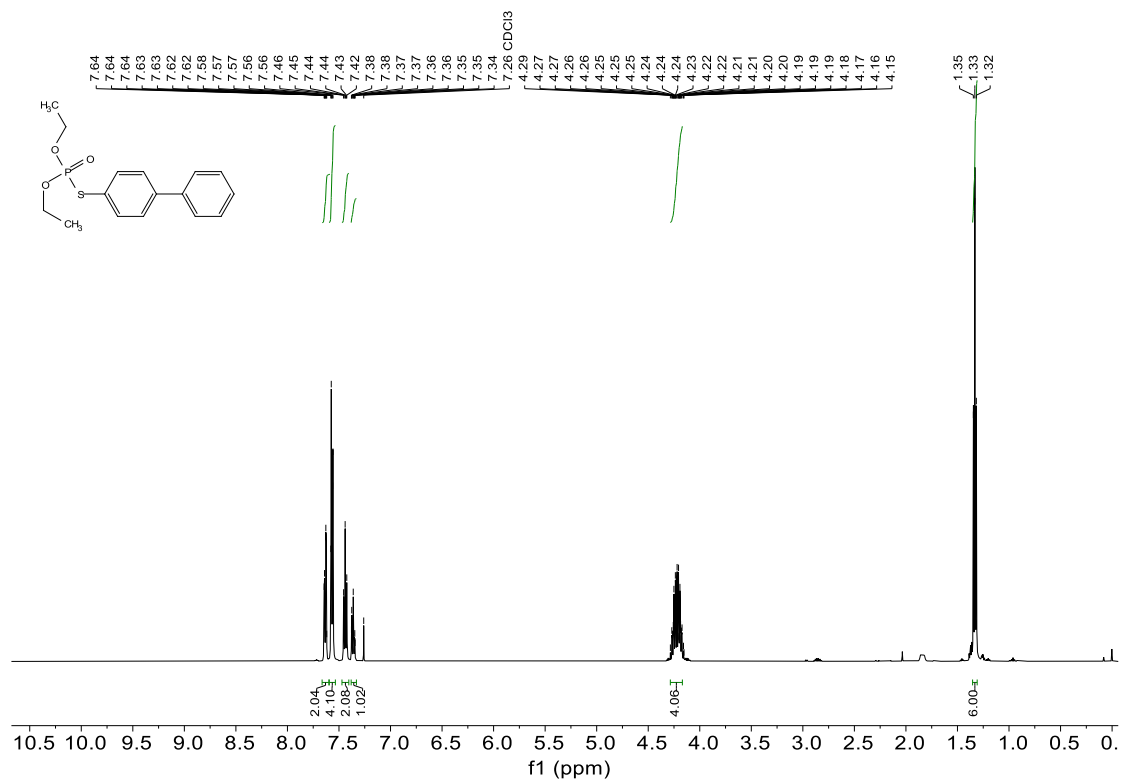

$^1\text{H NMR}$  (500 MHz,  $\text{CDCl}_3$ ) spectrum of compound 4e

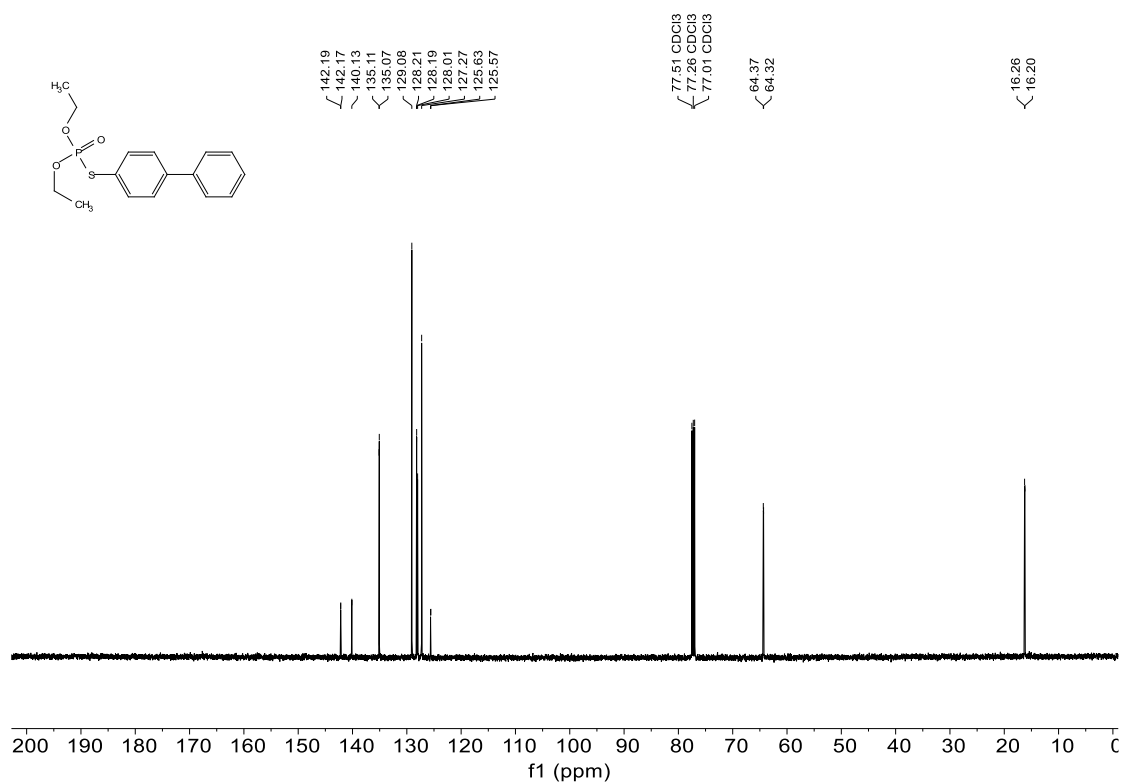

$^{13}\text{C}\{^1\text{H}\}$  NMR (126 MHz,  $\text{CDCl}_3$ ) spectrum of compound 4e

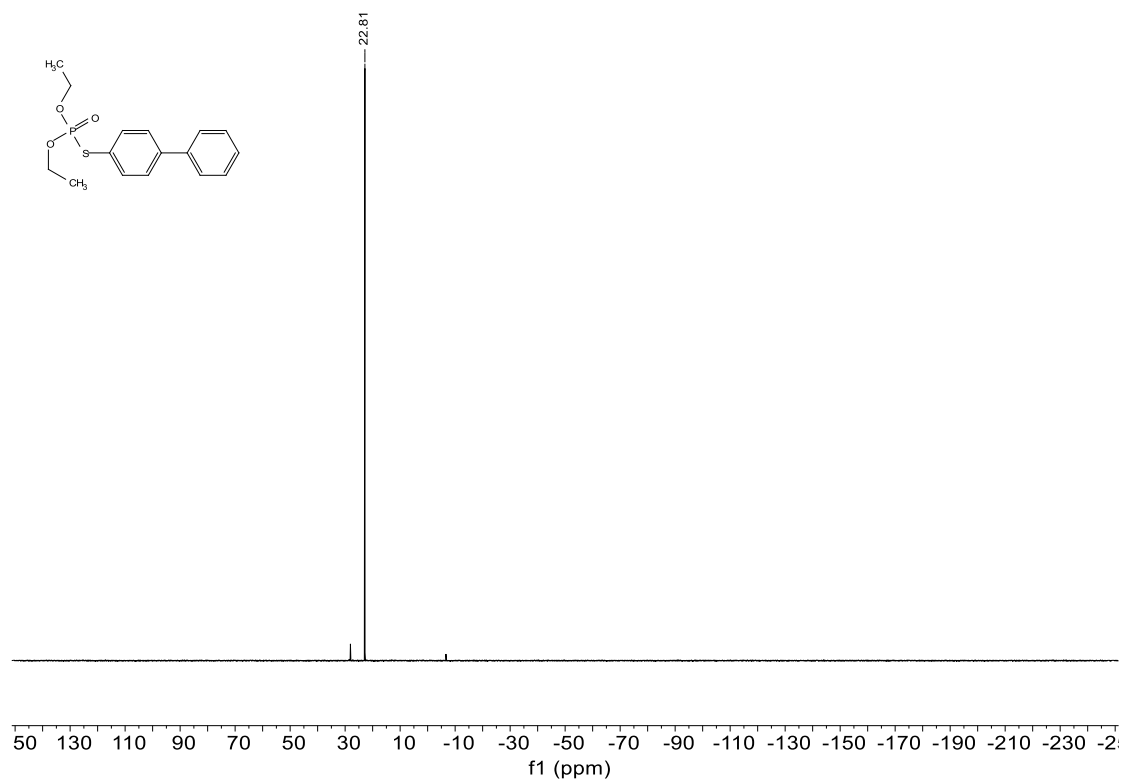

$^{31}\text{P}$  NMR (202 MHz,  $\text{CDCl}_3$ ) spectrum of compound 4e

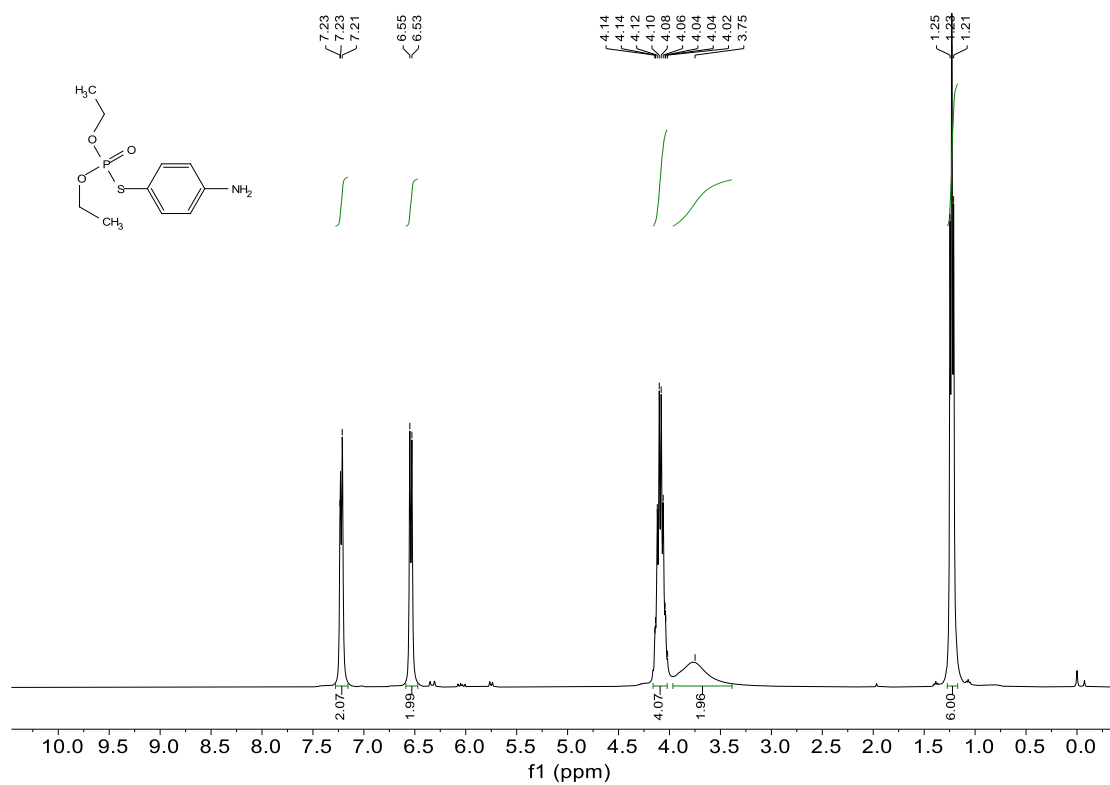

$^1\text{H}$  NMR (400 MHz,  $\text{CDCl}_3$ ) spectrum of compound 4f

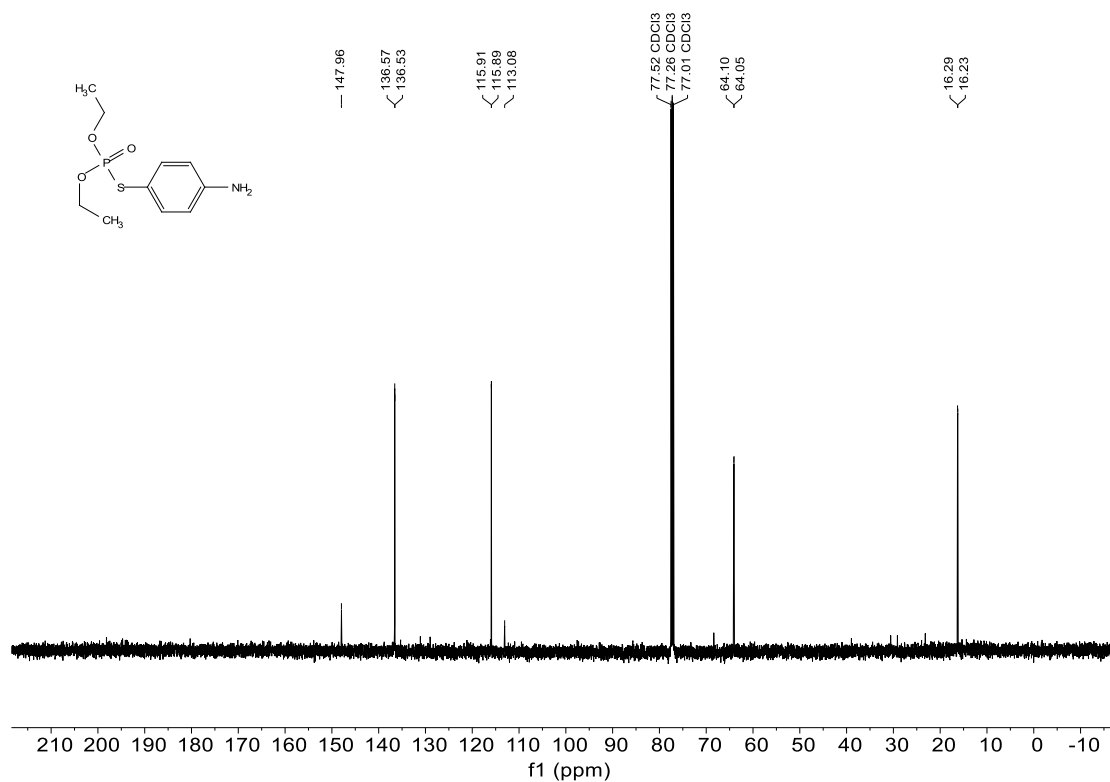

$^{13}\text{C}\{^1\text{H}\}$  NMR (101 MHz,  $\text{CDCl}_3$ ) spectrum of compound 4f

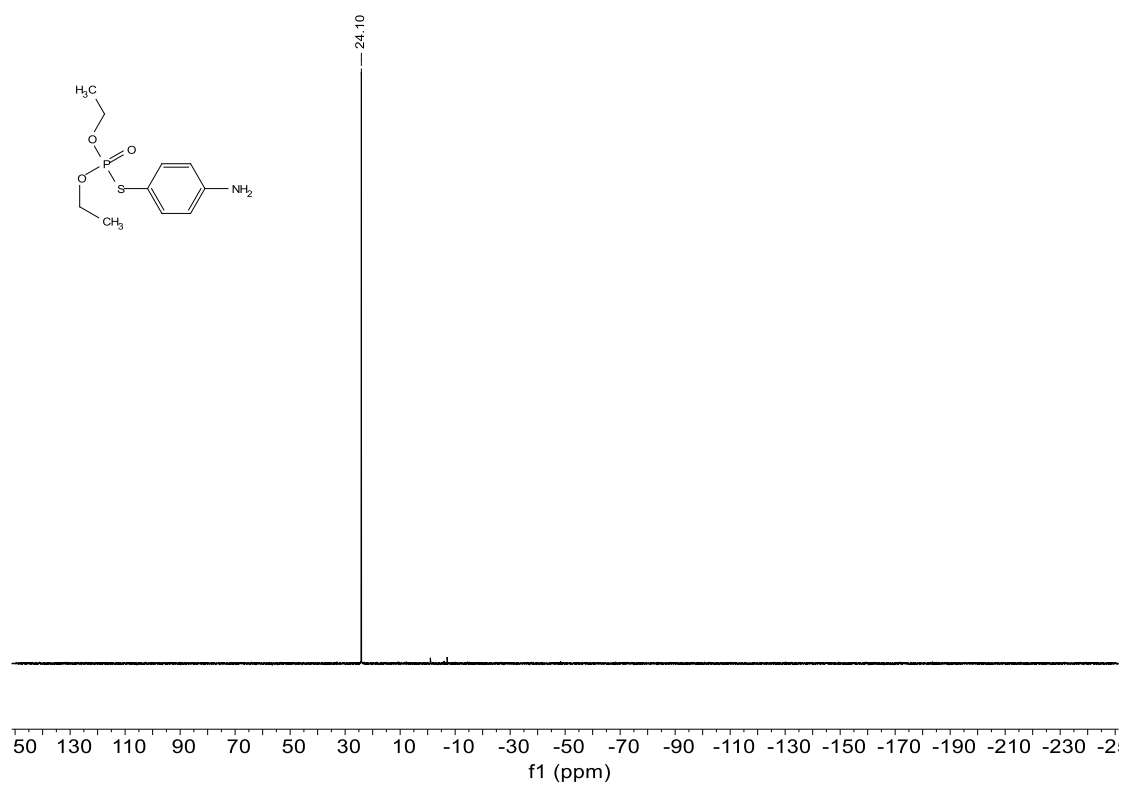

$^{31}\text{P}\{^1\text{H}\}$  NMR (202 MHz,  $\text{CDCl}_3$ ) spectrum of compound 4f

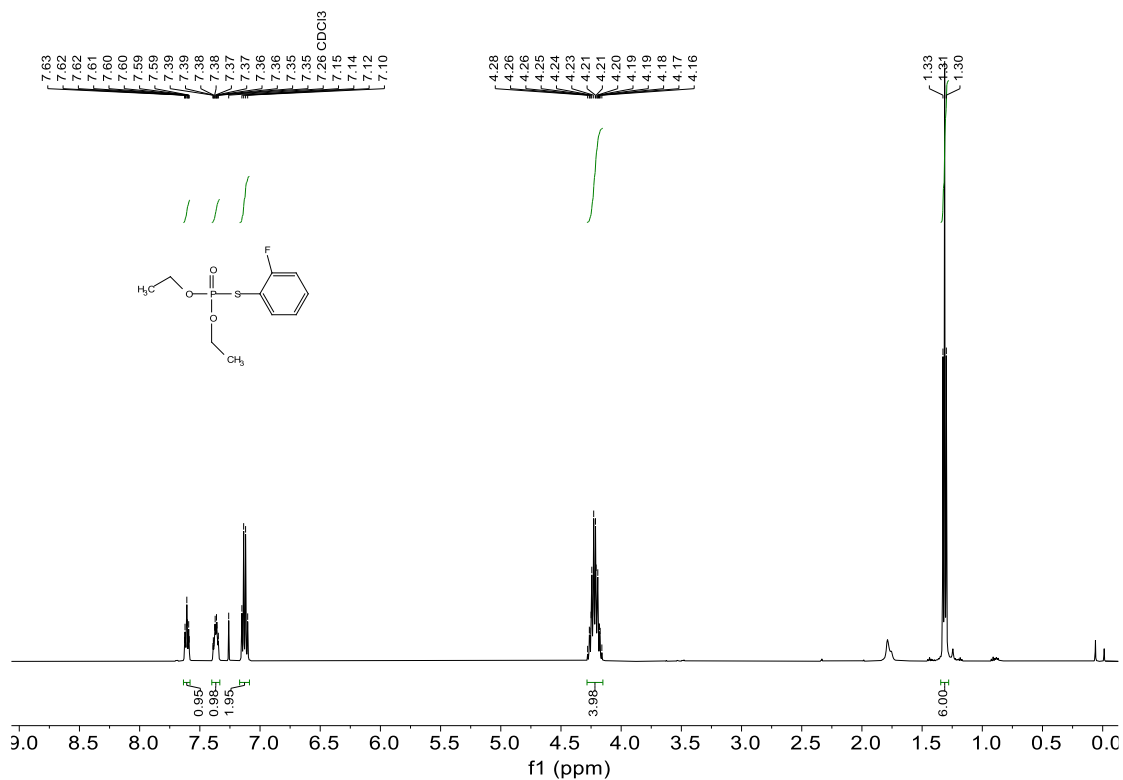

$^1\text{H NMR}$  (600 MHz,  $\text{CDCl}_3$ ) spectrum of compound 4g

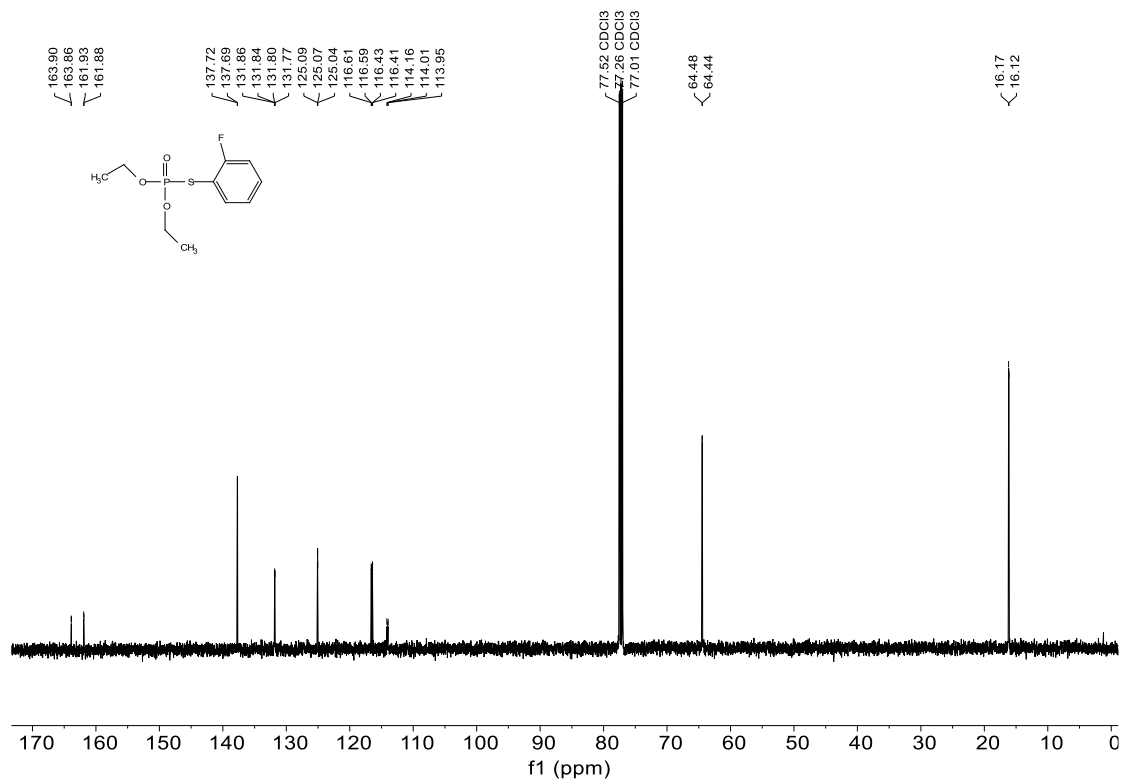

$^{13}\text{C}\{^1\text{H}\}$  NMR (126 MHz,  $\text{CDCl}_3$ ) spectrum of compound 4g

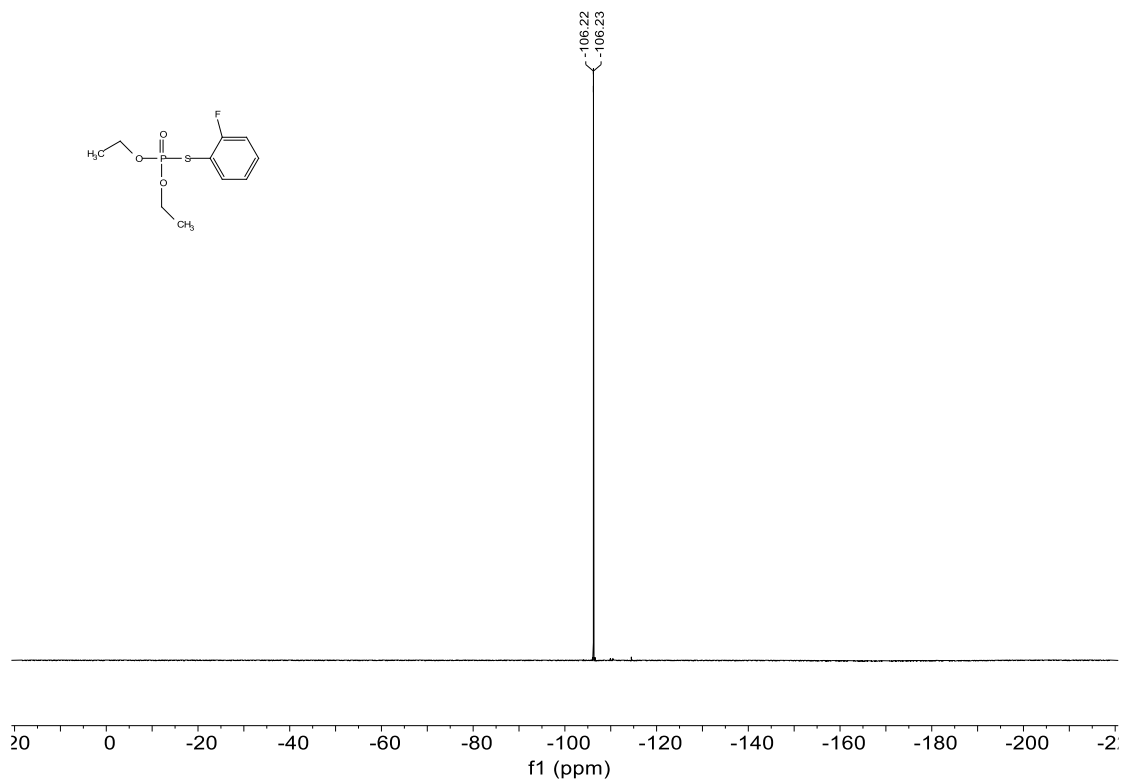

$^{19}\text{F}\{^1\text{H}\}$  NMR (471 MHz,  $\text{CDCl}_3$ ) spectrum of compound **4g**

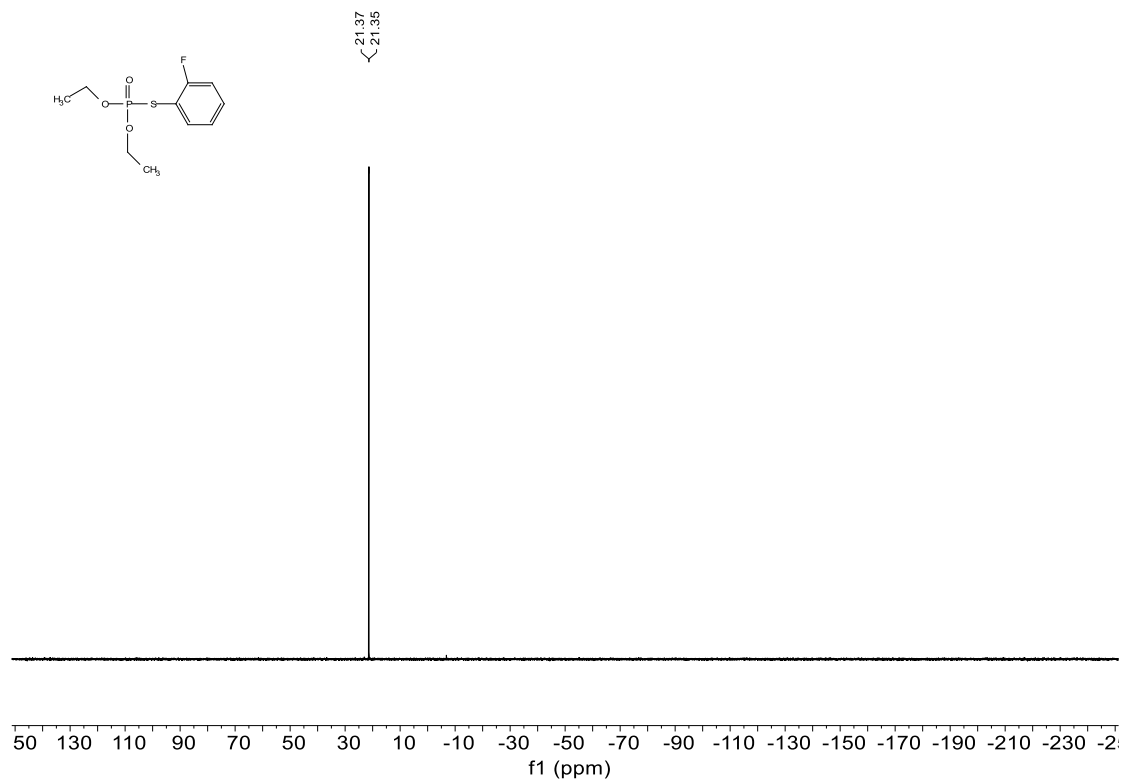

$^{31}\text{P}\{^1\text{H}\}$  NMR (202 MHz,  $\text{CDCl}_3$ ) spectrum of compound **4g**

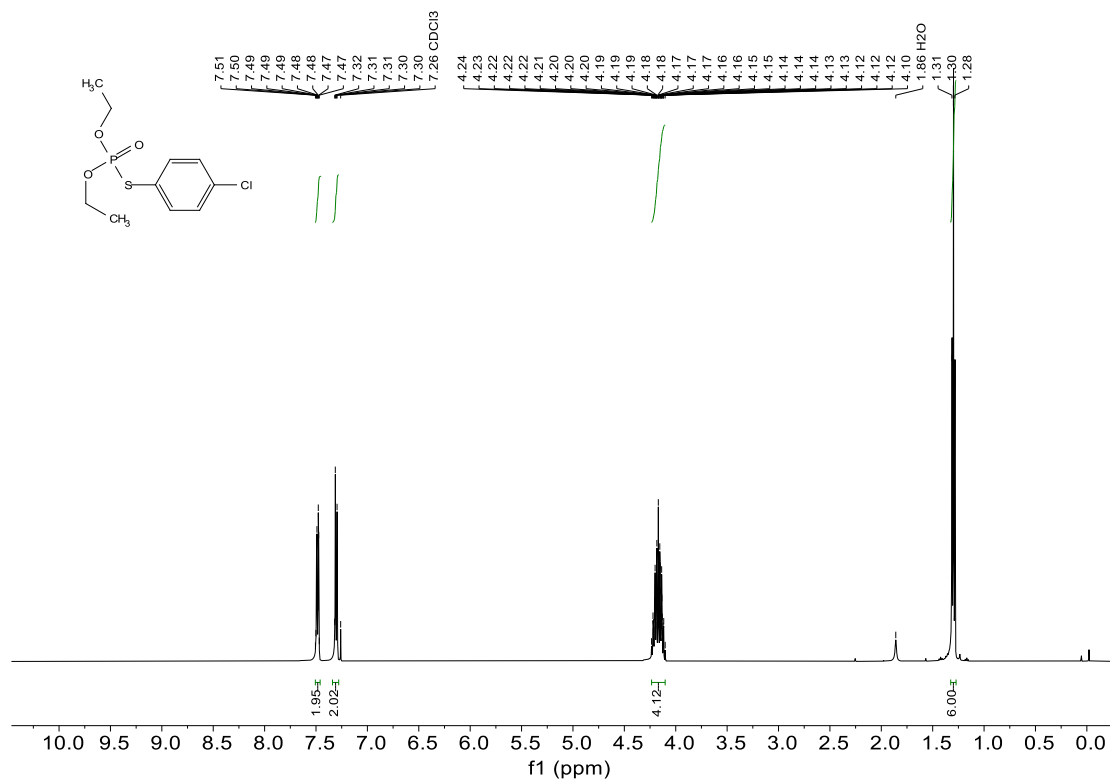

$^1\text{H NMR}$  (500 MHz,  $\text{CDCl}_3$ ) spectrum of compound **4h**

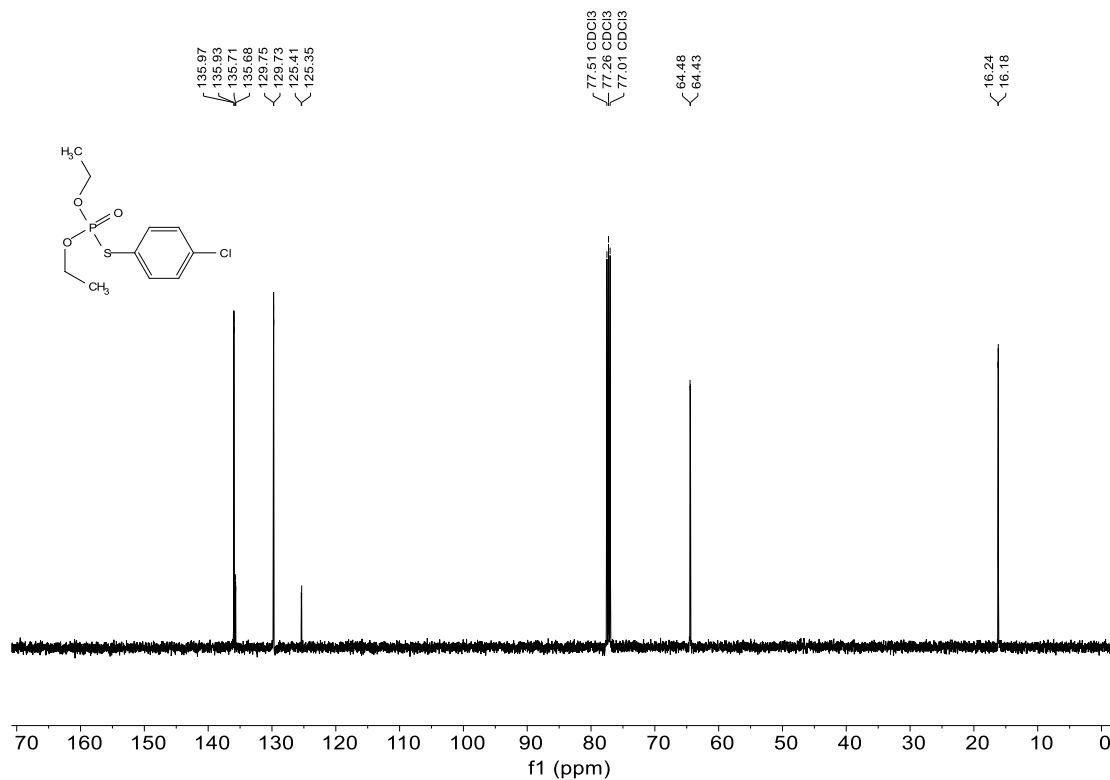

$^{13}\text{C}\{^1\text{H}\}$  NMR (126 MHz,  $\text{CDCl}_3$ ) spectrum of compound **4h**

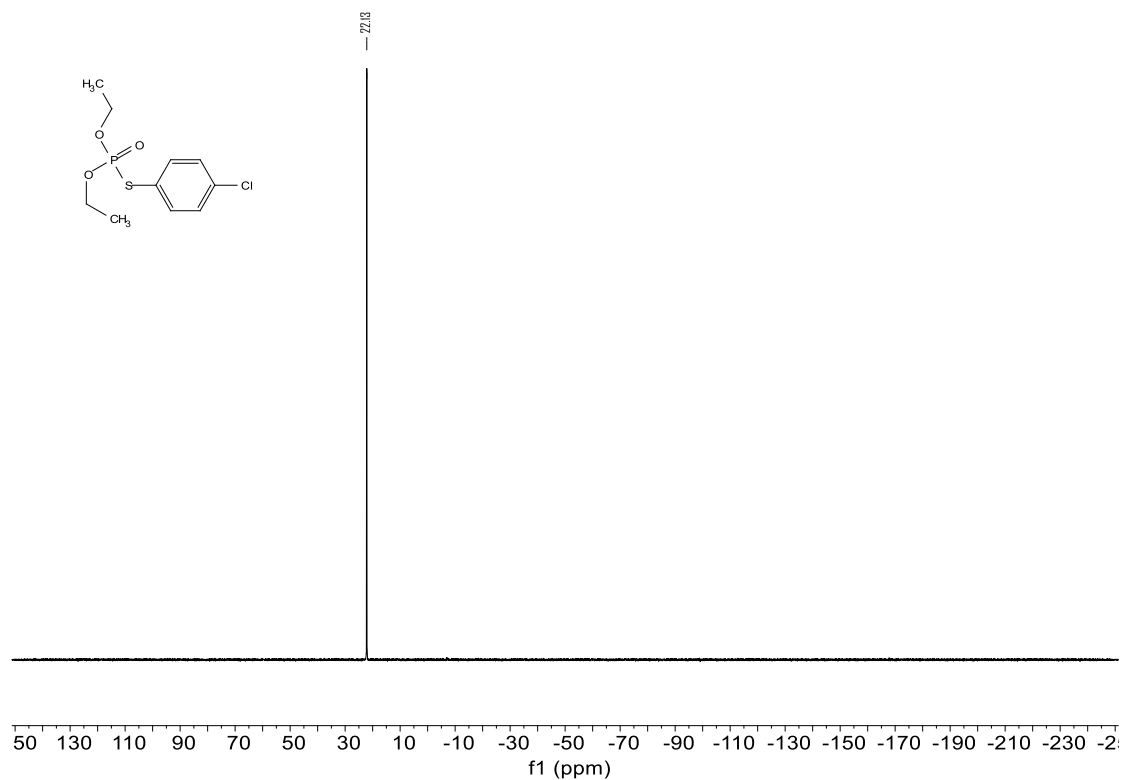

$^{31}\text{P}\{^1\text{H}\}$  NMR (202 MHz,  $\text{CDCl}_3$ ) spectrum of compound **4h**

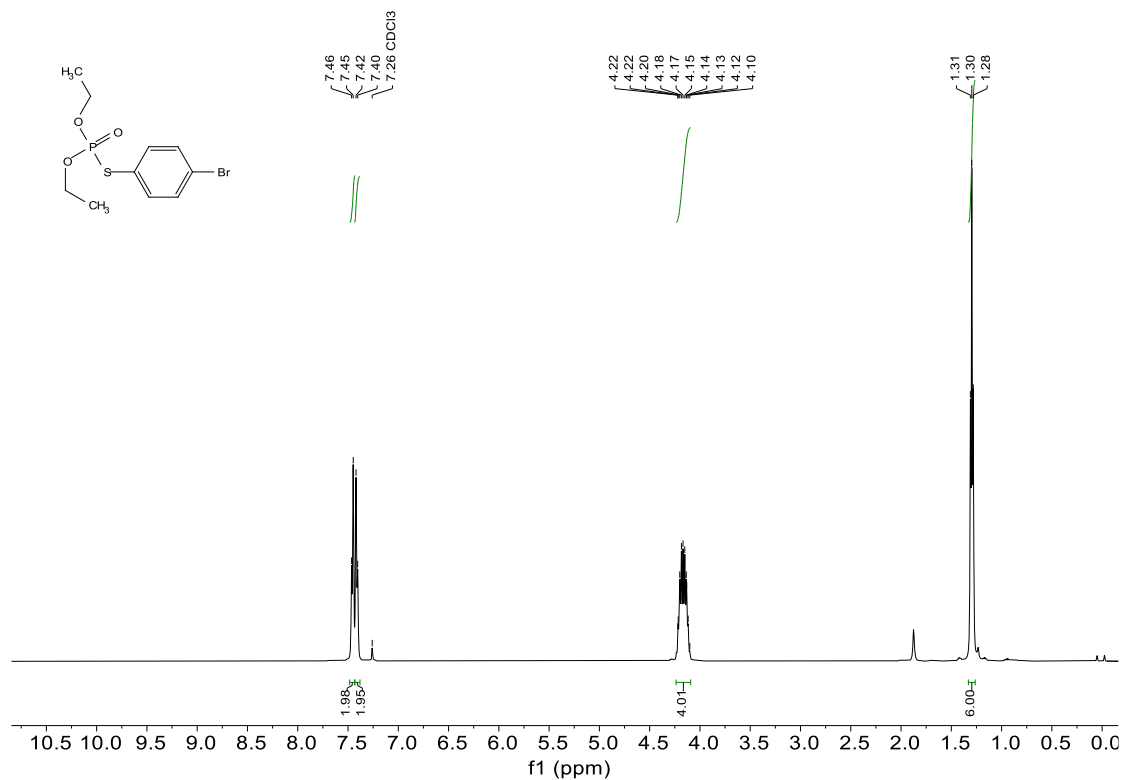

$^1\text{H}$  NMR (500 MHz,  $\text{CDCl}_3$ ) spectrum of compound **4i**

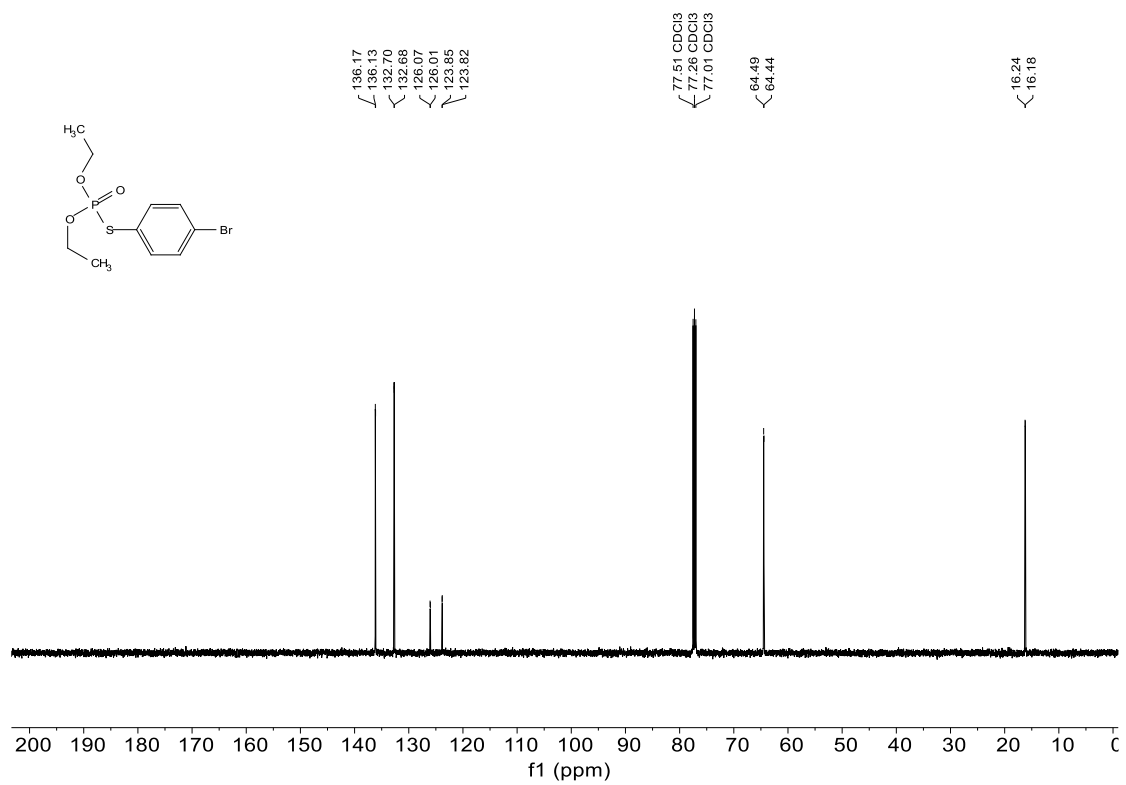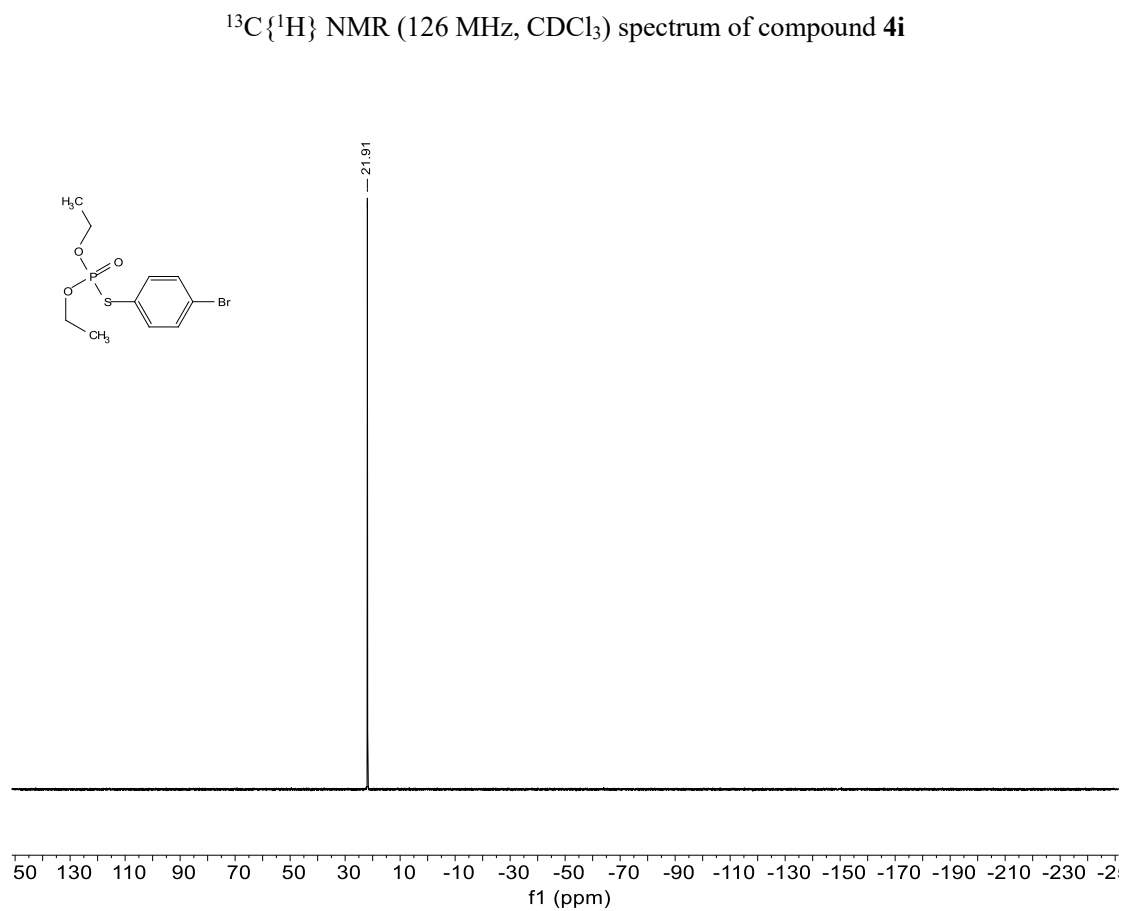



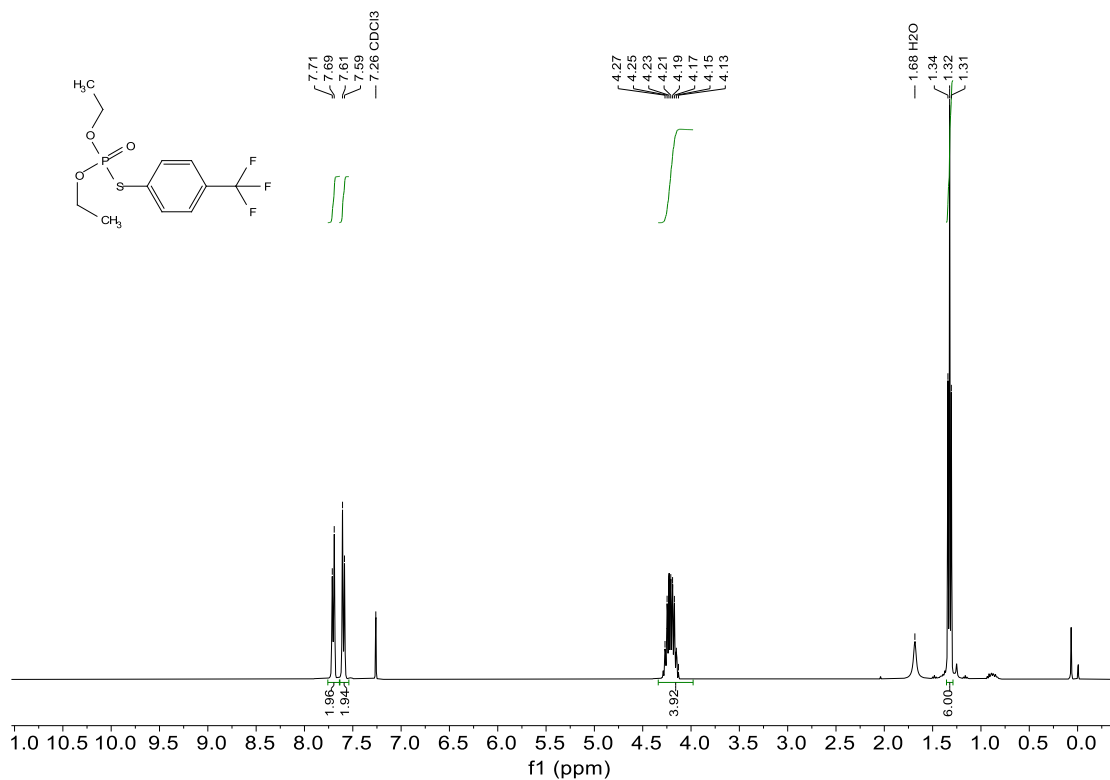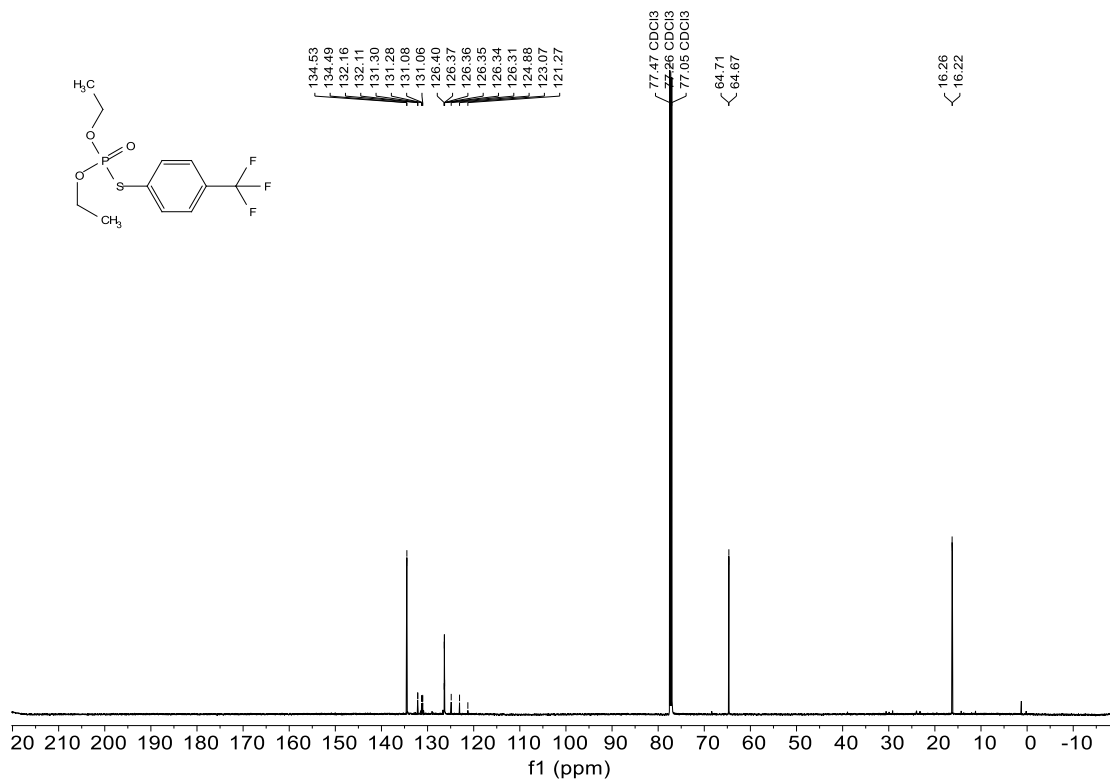

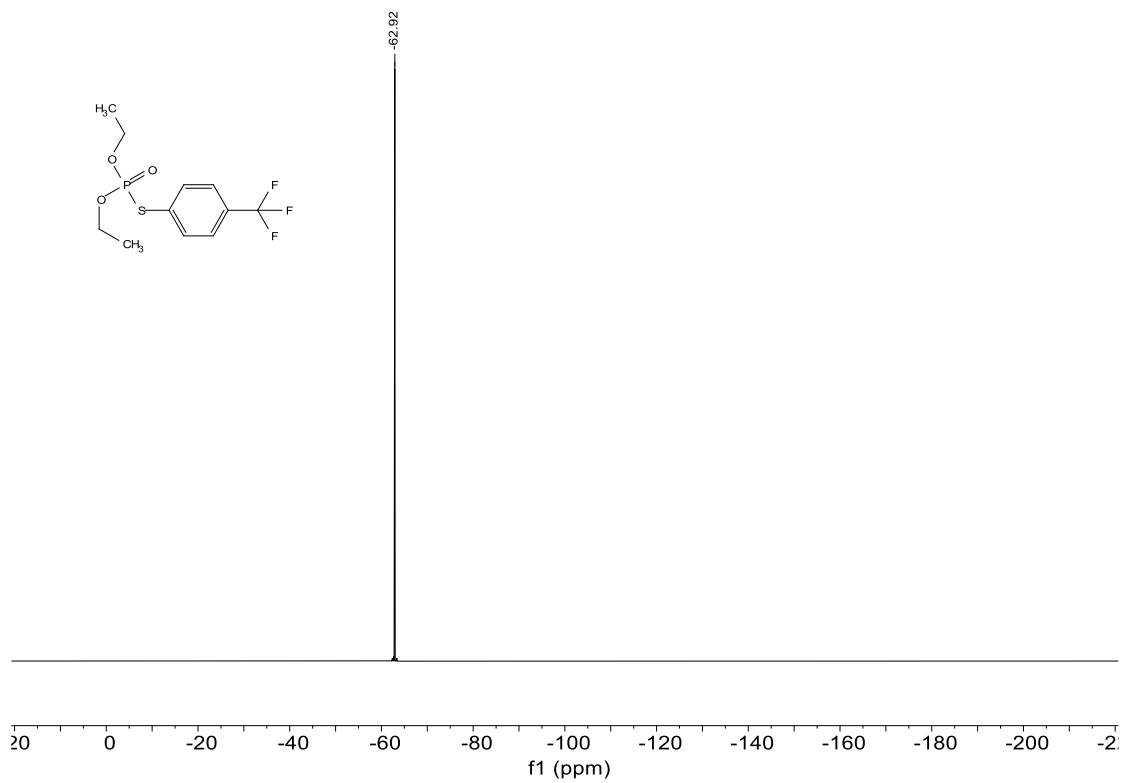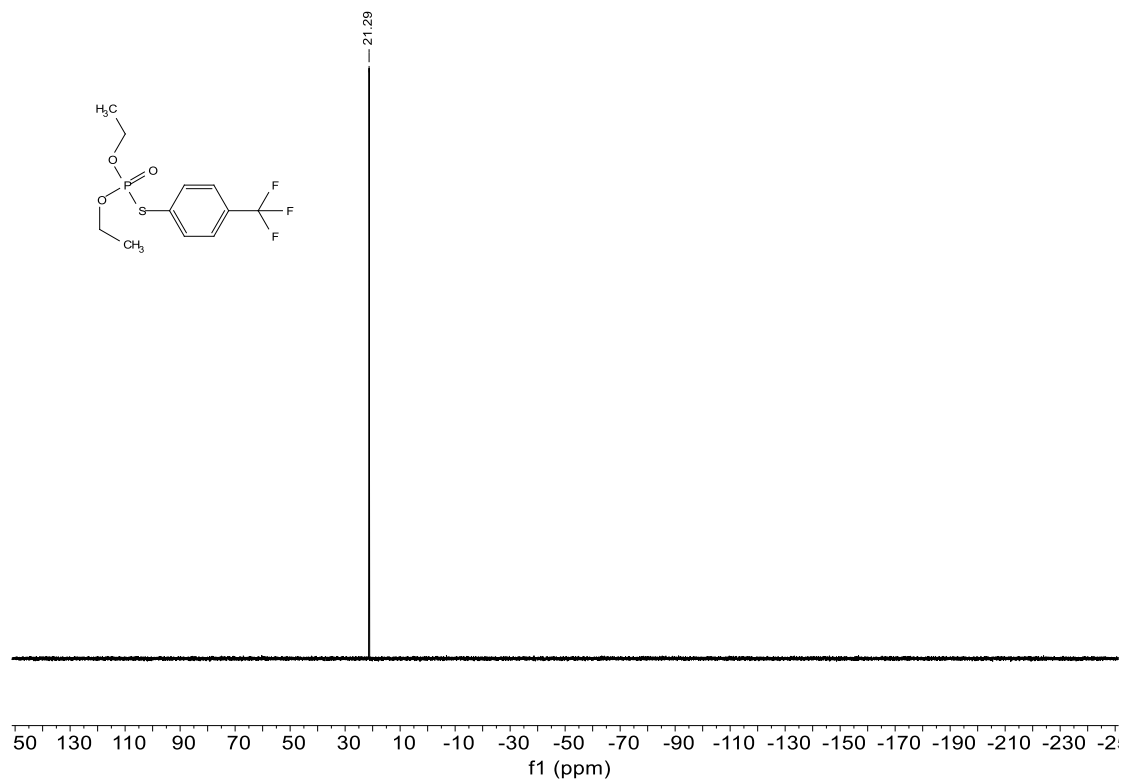

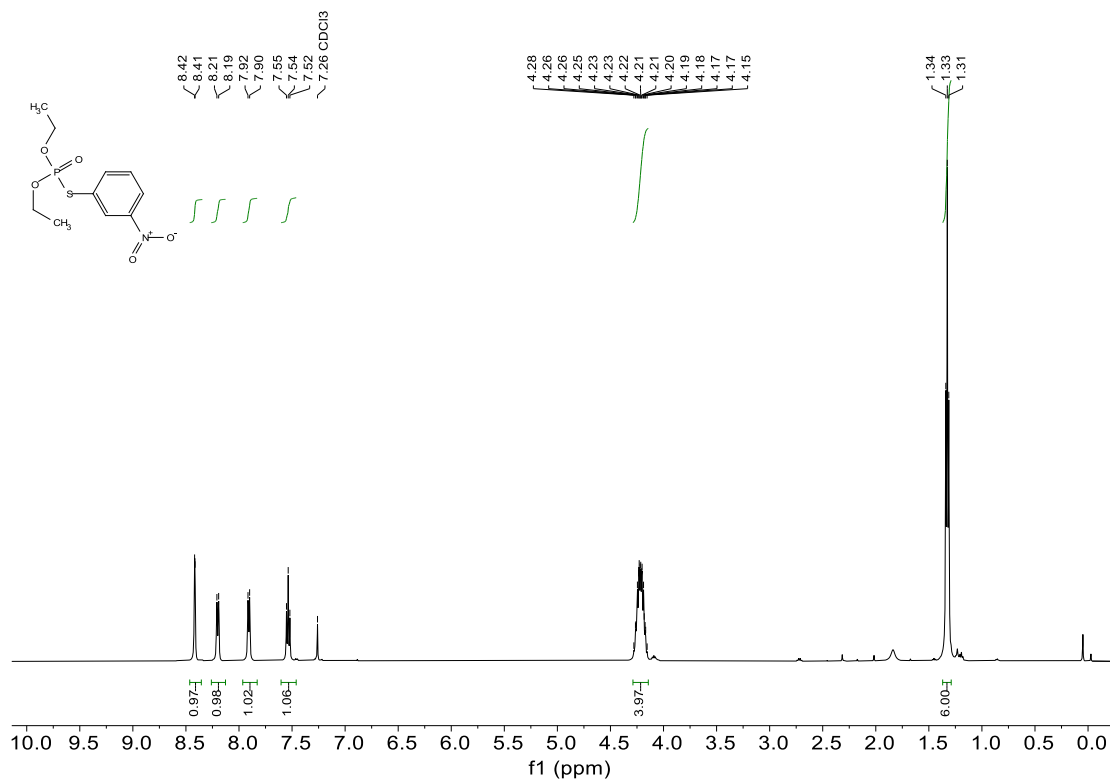

$^1\text{H NMR}$  (500 MHz,  $\text{CDCl}_3$ ) spectrum of compound 4k

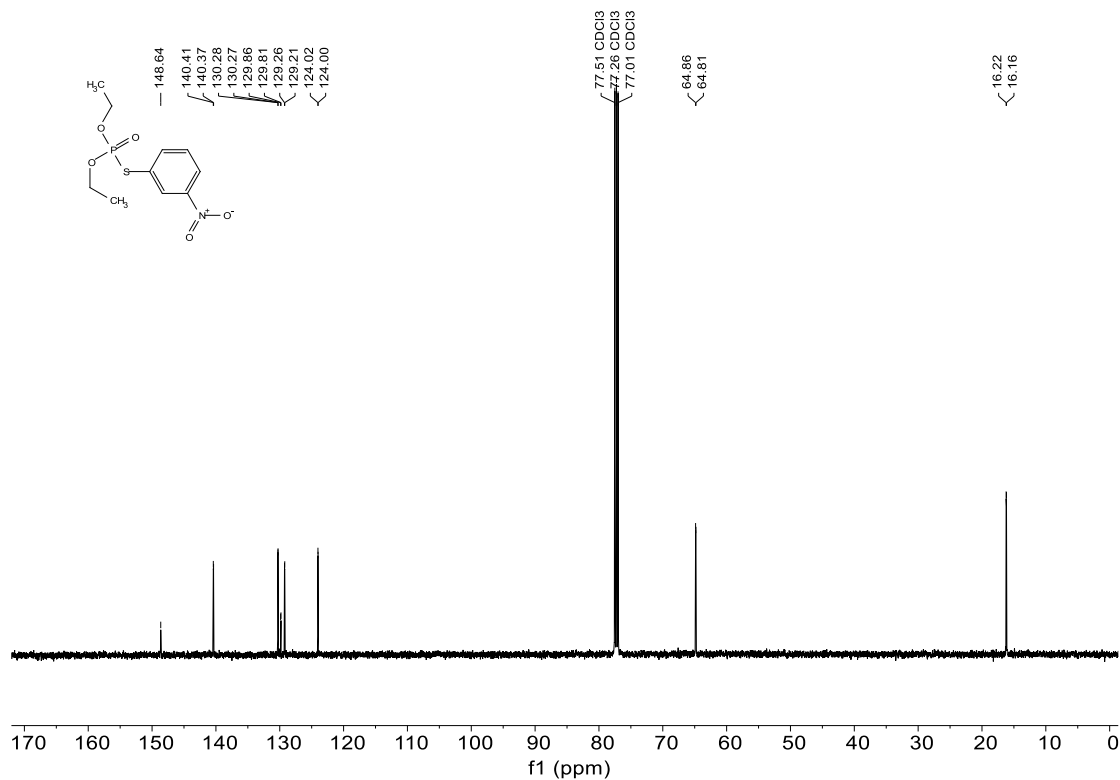

$^{13}\text{C}\{^1\text{H}\}$  NMR (126 MHz,  $\text{CDCl}_3$ ) spectrum of compound 4k

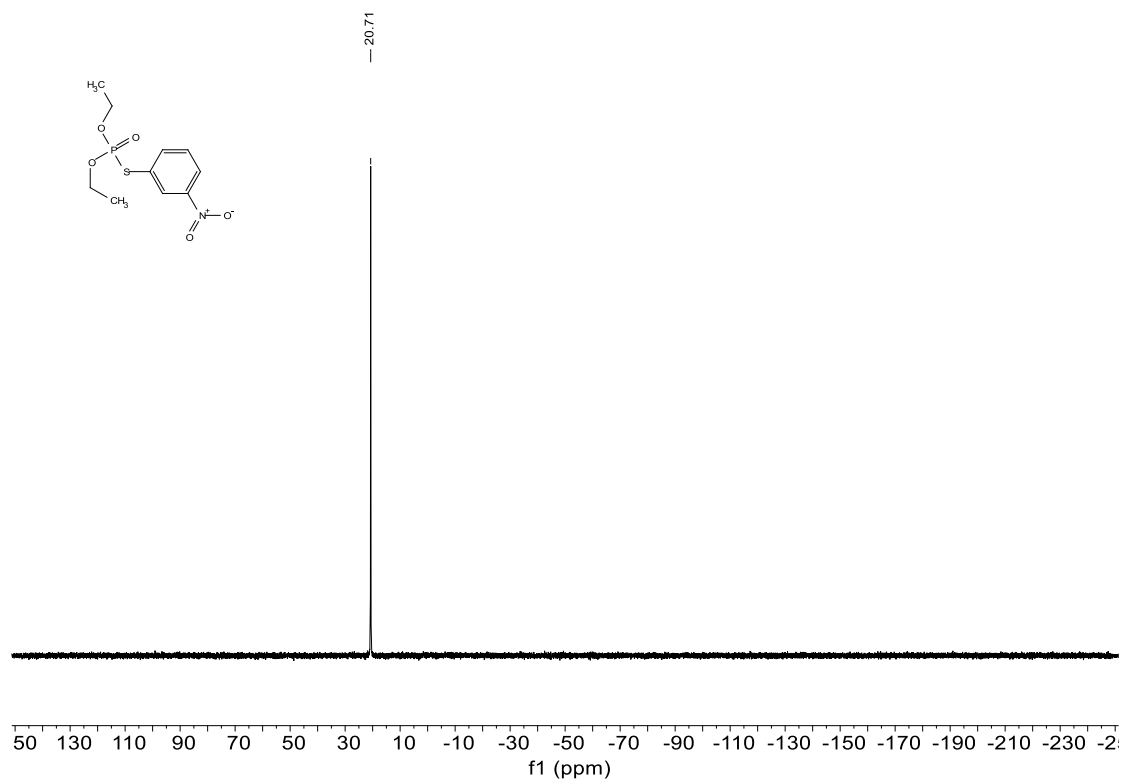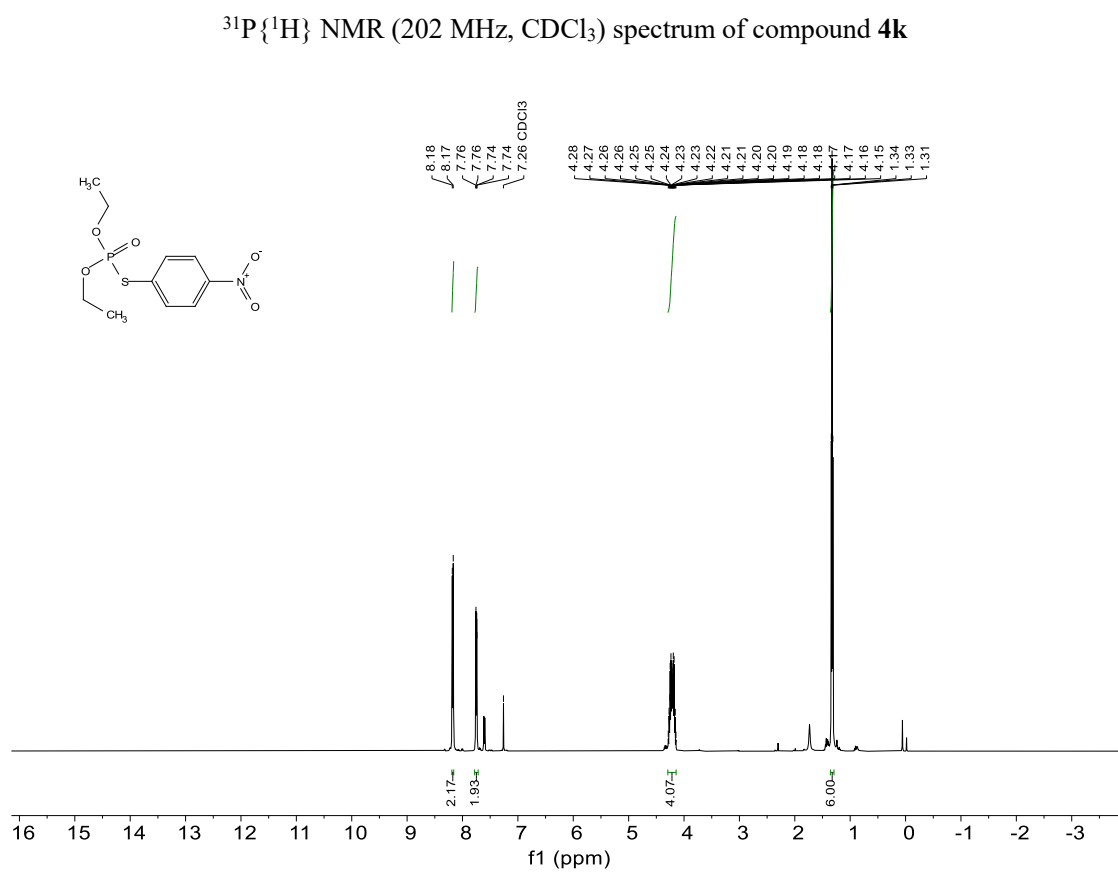

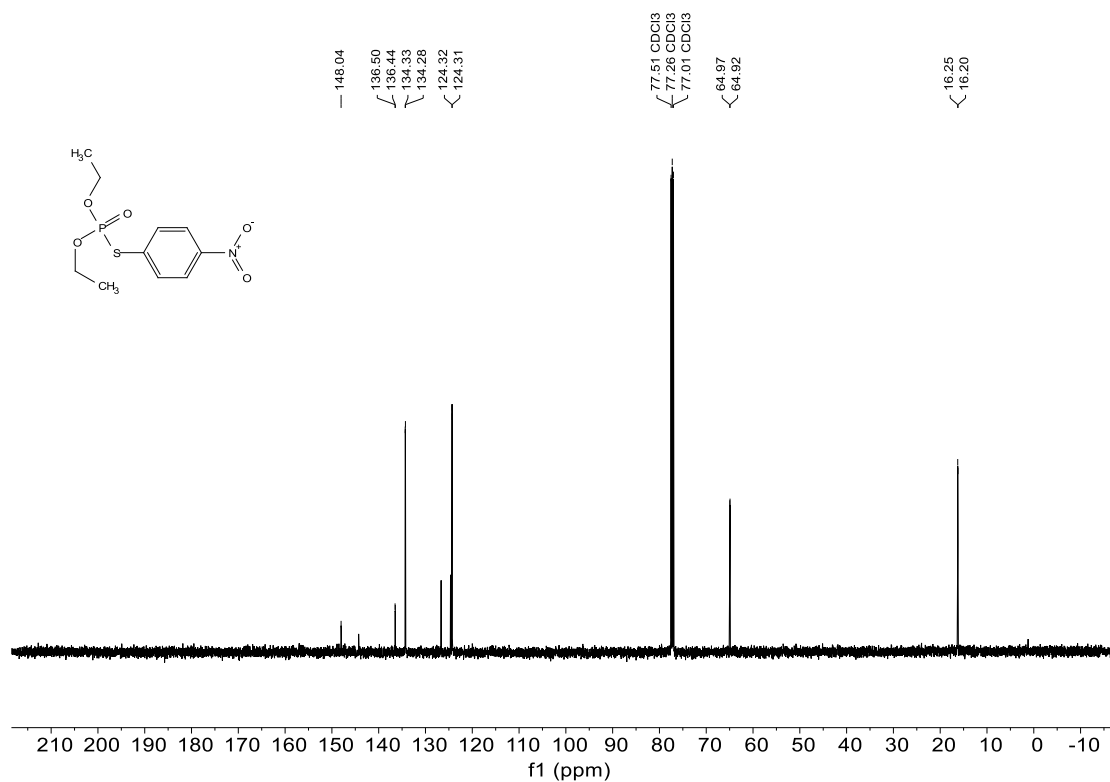

$^{13}\text{C}\{^1\text{H}\}$  NMR (126 MHz,  $\text{CDCl}_3$ ) spectrum of compound **41**

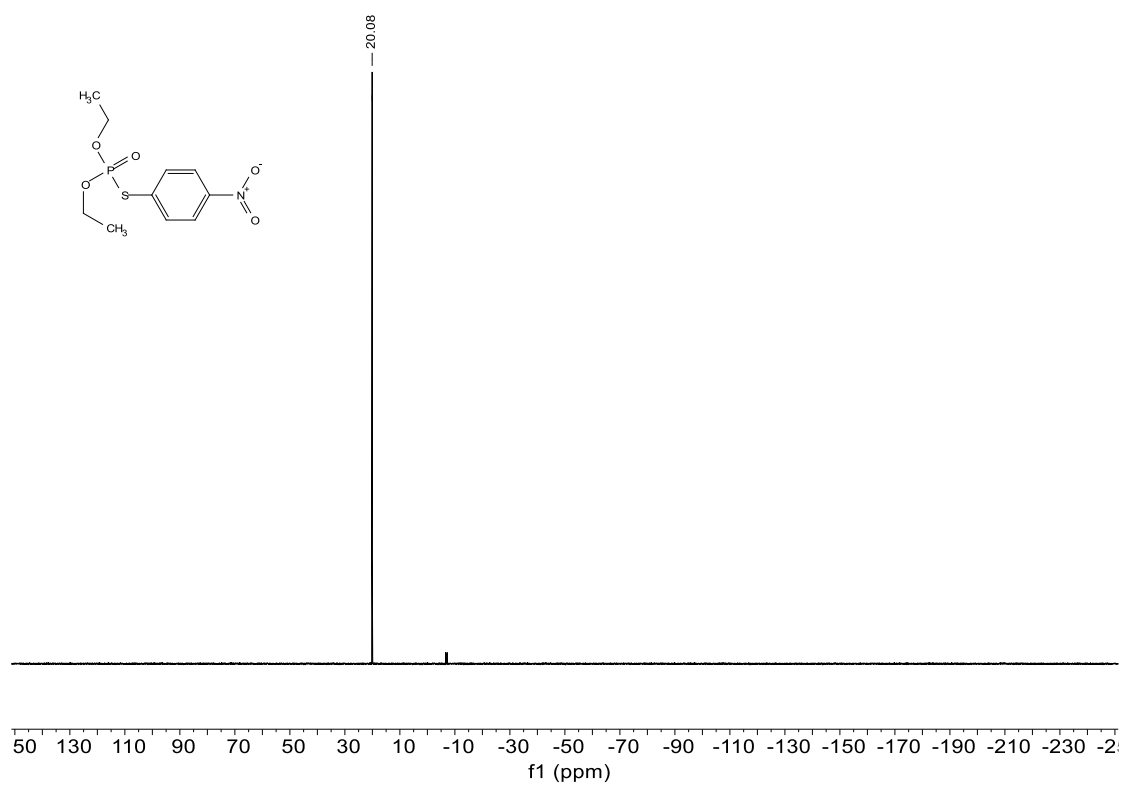

$^{31}\text{P}\{^1\text{H}\}$  NMR (202 MHz,  $\text{CDCl}_3$ ) spectrum of compound **41**

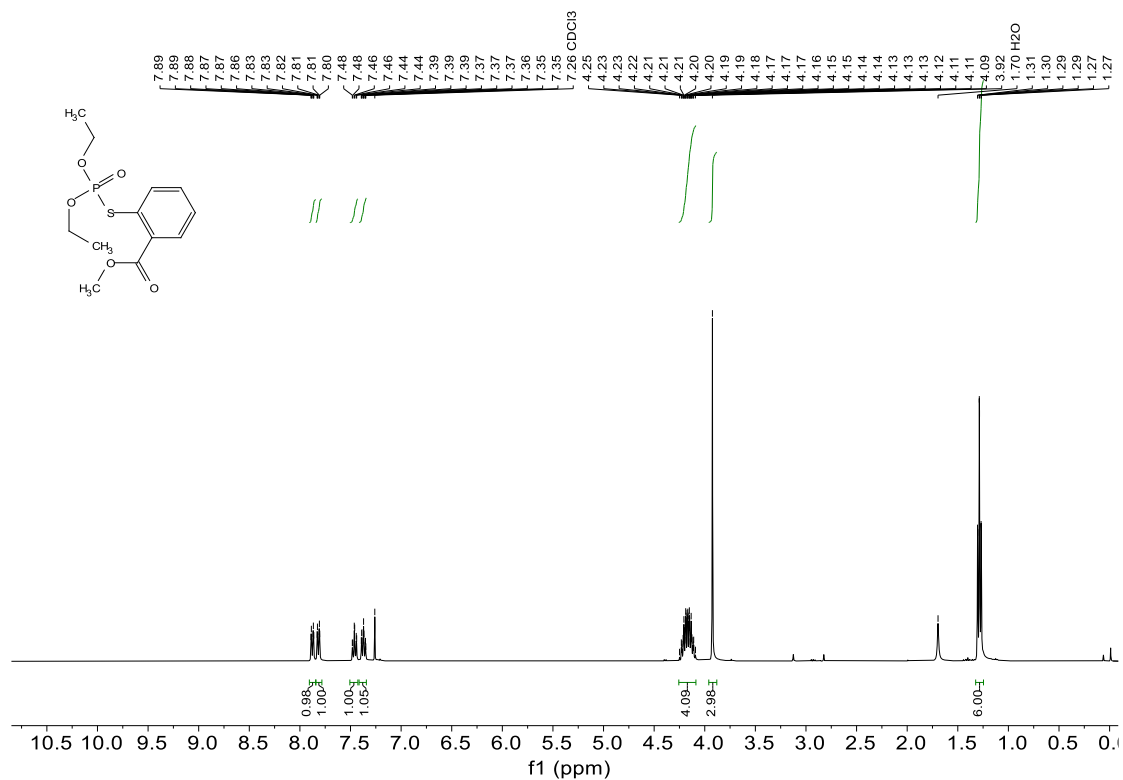

$^1\text{H}$  NMR (500 MHz,  $\text{CDCl}_3$ ) spectrum of compound **4m**

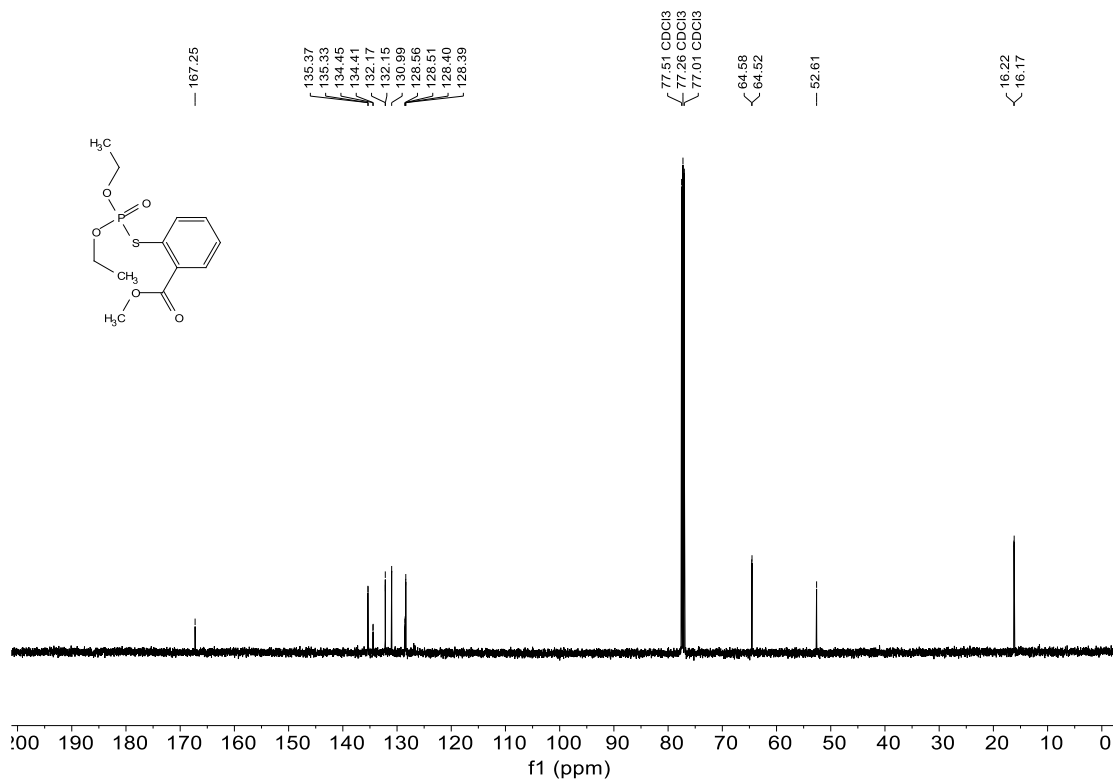

$^{13}\text{C}$   $\{^1\text{H}\}$  NMR (126 MHz,  $\text{CDCl}_3$ ) spectrum of compound **4m**

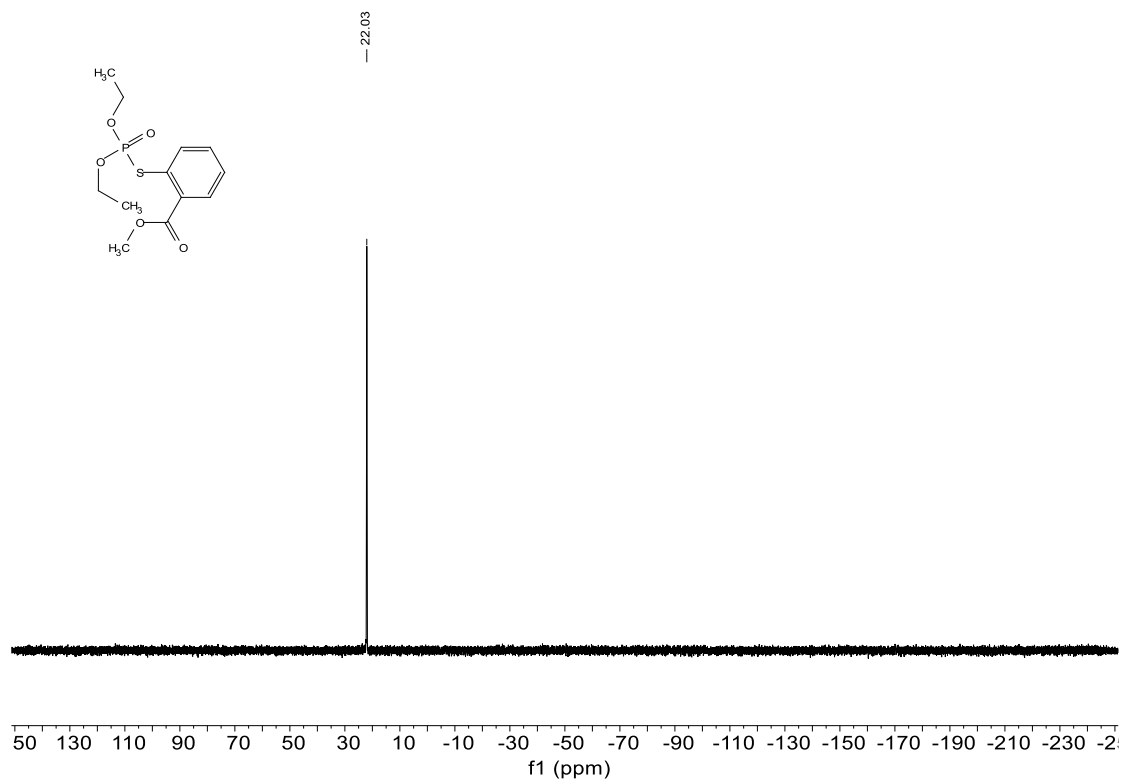

$^{31}\text{P}\{^1\text{H}\}$  NMR (202 MHz,  $\text{CDCl}_3$ ) spectrum of compound **4m**

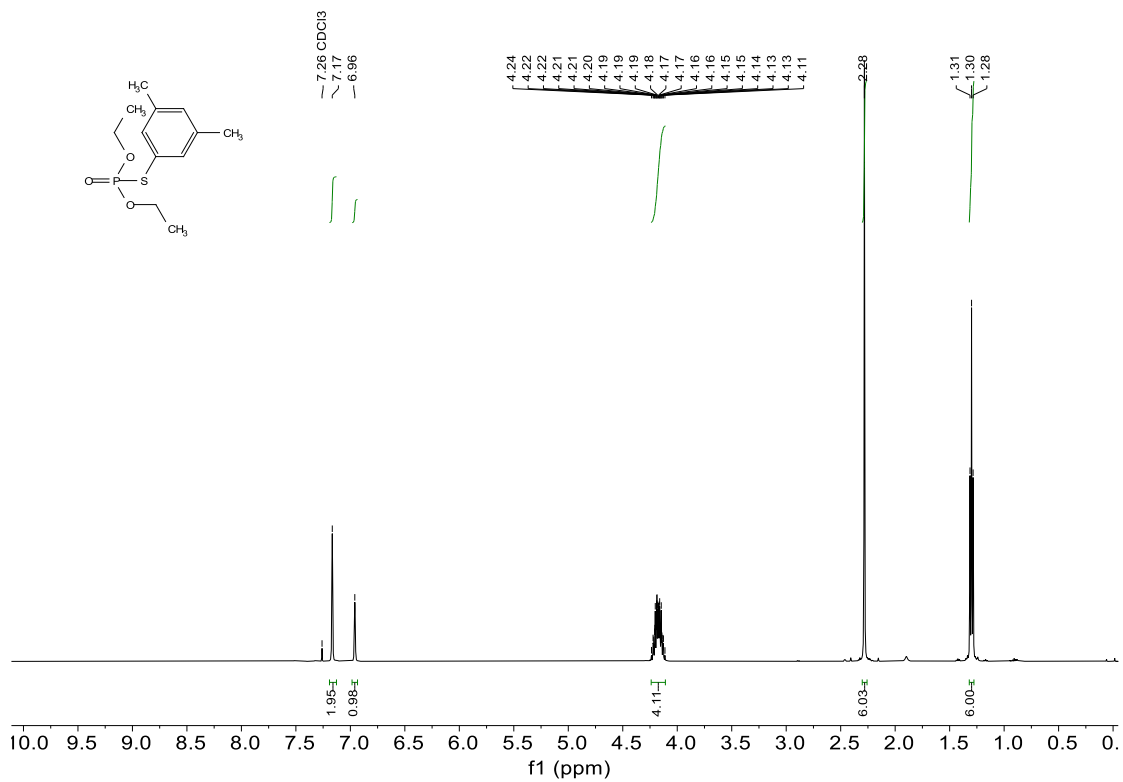

$^1\text{H}$  NMR (500 MHz,  $\text{CDCl}_3$ ) spectrum of compound **4n**

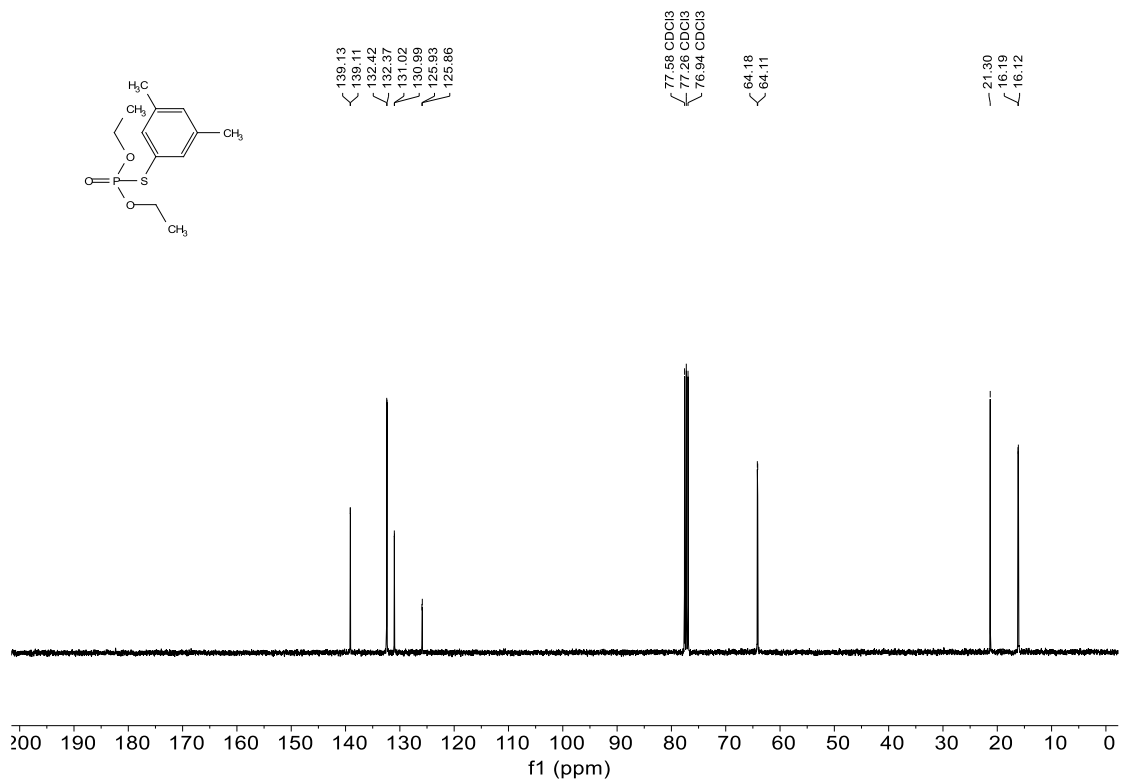

$^{13}\text{C}\{^1\text{H}\}$  NMR (126 MHz,  $\text{CDCl}_3$ ) spectrum of compound **4n**

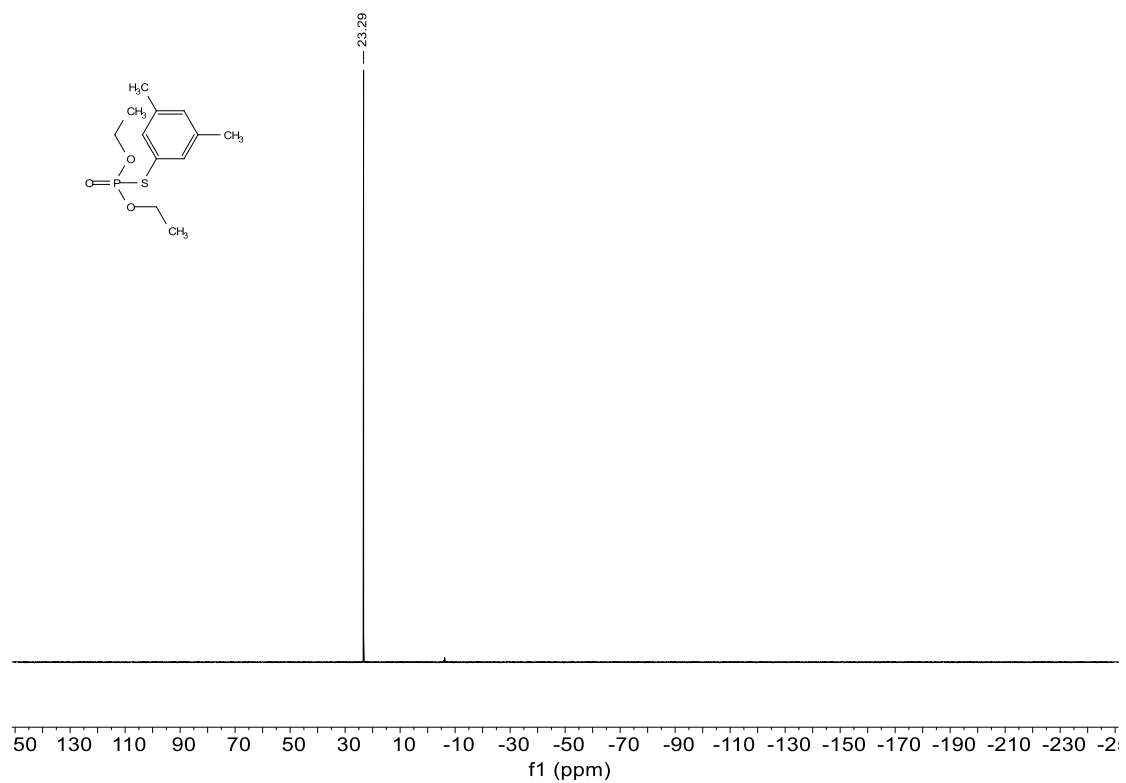

$^{31}\text{P}\{^1\text{H}\}$  NMR (202 MHz,  $\text{CDCl}_3$ ) spectrum of compound **4n**



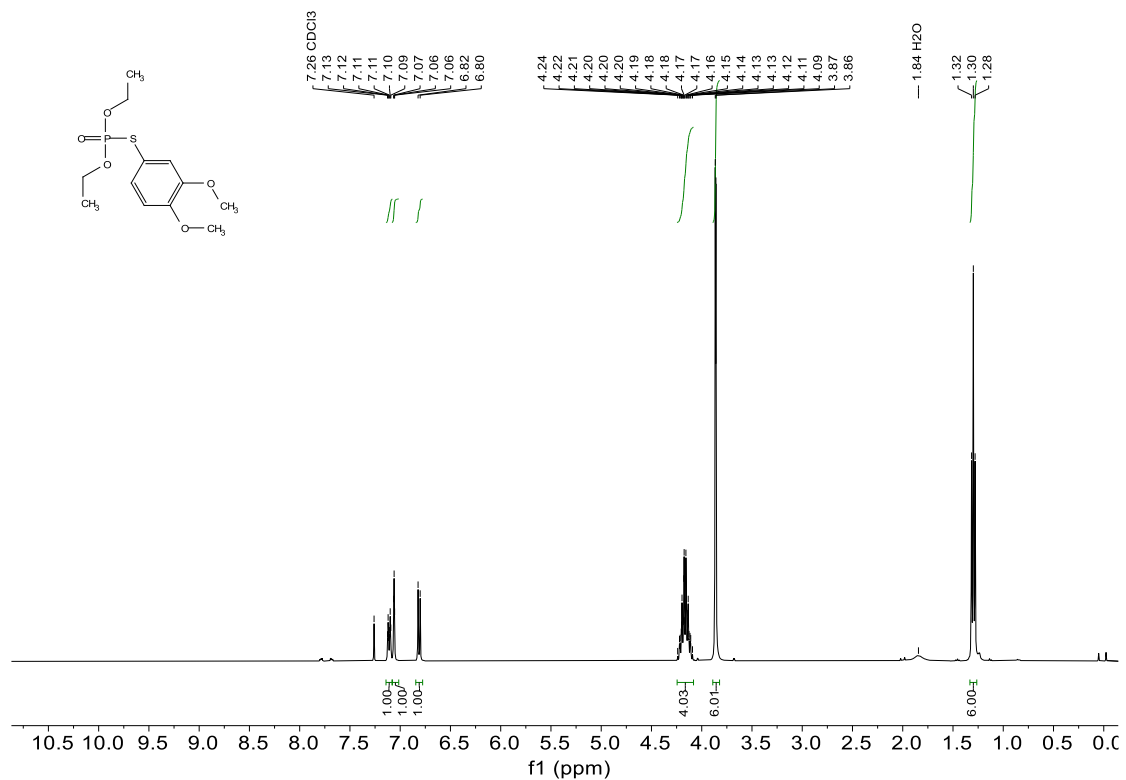

$^1\text{H}$  NMR (500 MHz,  $\text{CDCl}_3$ ) spectrum of compound **4o**

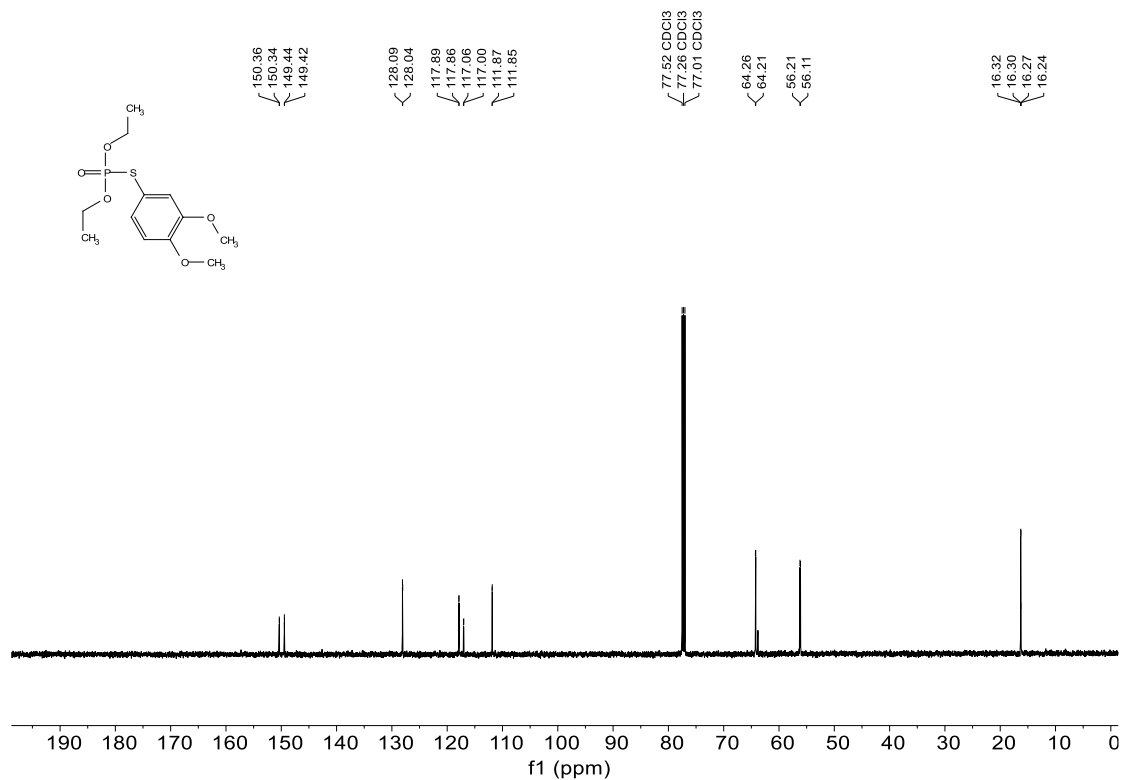

$^{13}\text{C}\{^1\text{H}\}$  NMR (126 MHz,  $\text{CDCl}_3$ ) spectrum of compound **4o**

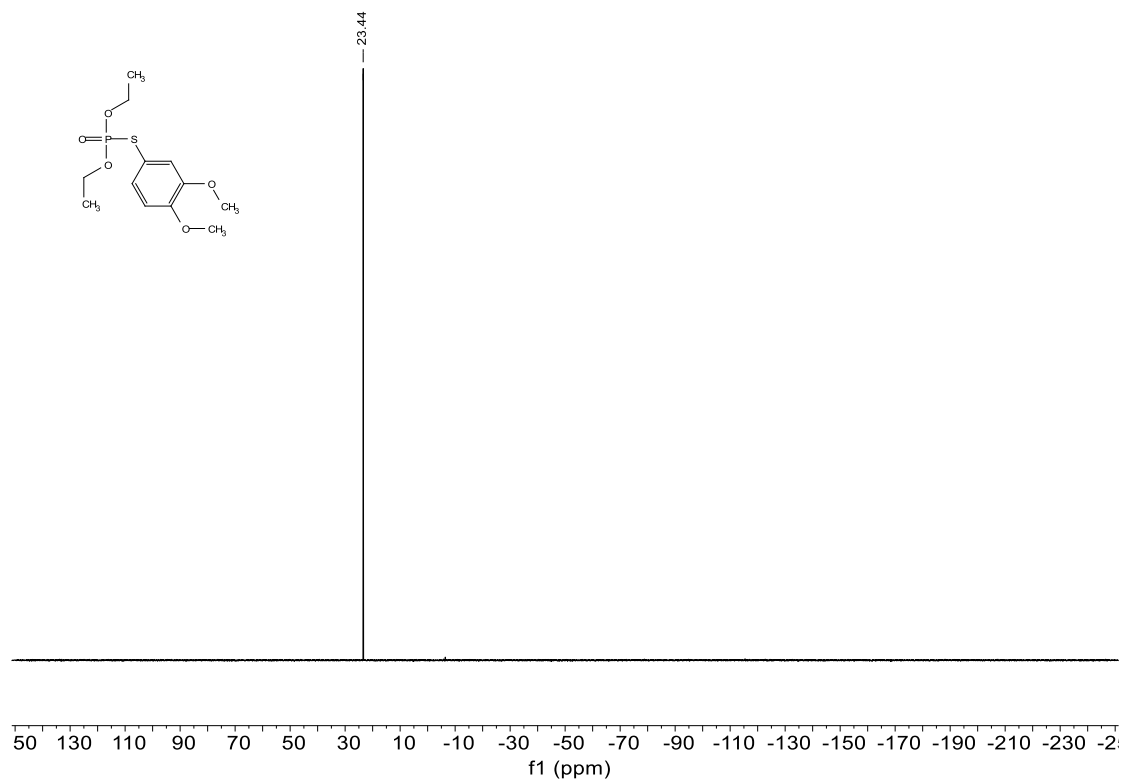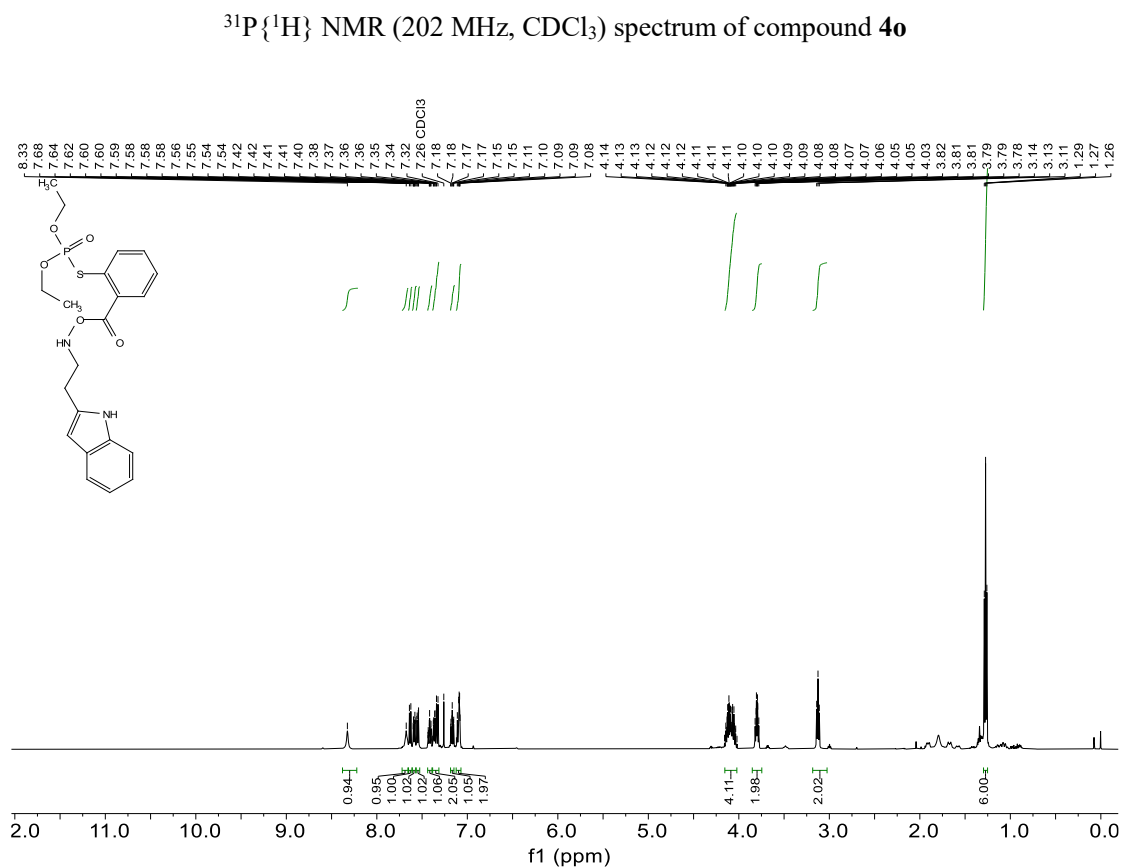

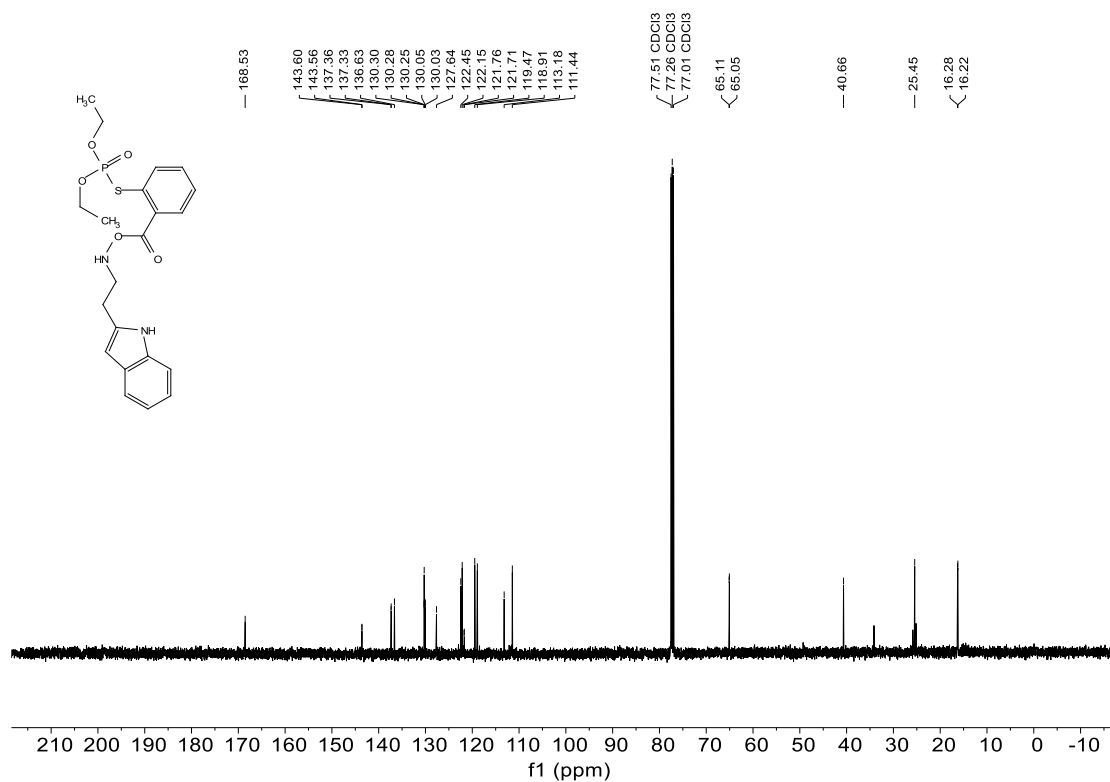

$^{13}\text{C}\{^1\text{H}\}$  NMR (126 MHz,  $\text{CDCl}_3$ ) spectrum of compound **4p**

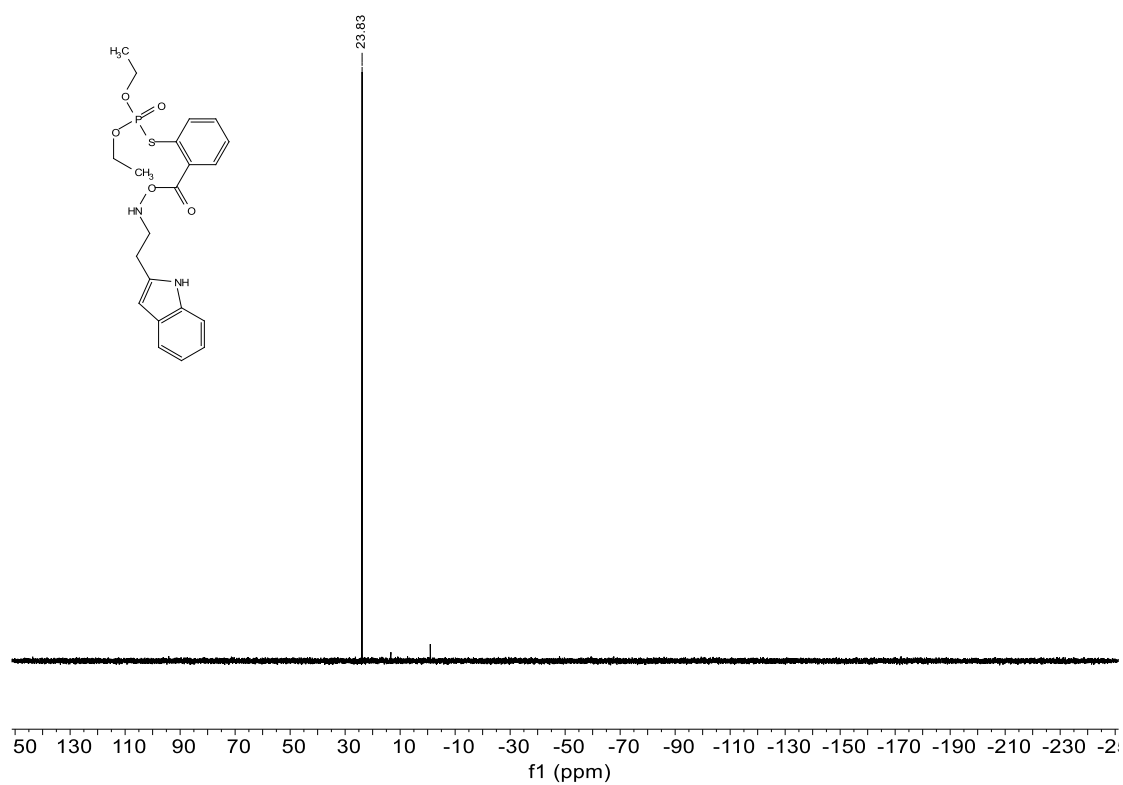

$^{31}\text{P}\{^1\text{H}\}$  NMR (202 MHz,  $\text{CDCl}_3$ ) spectrum of compound **4p**

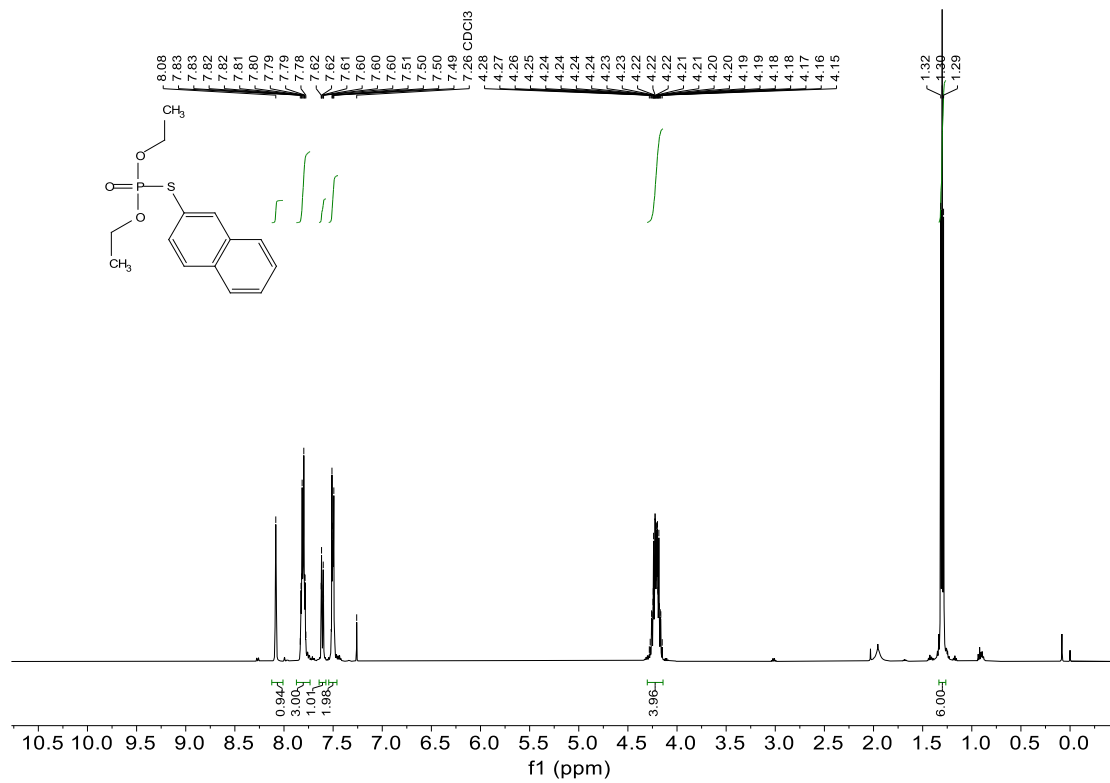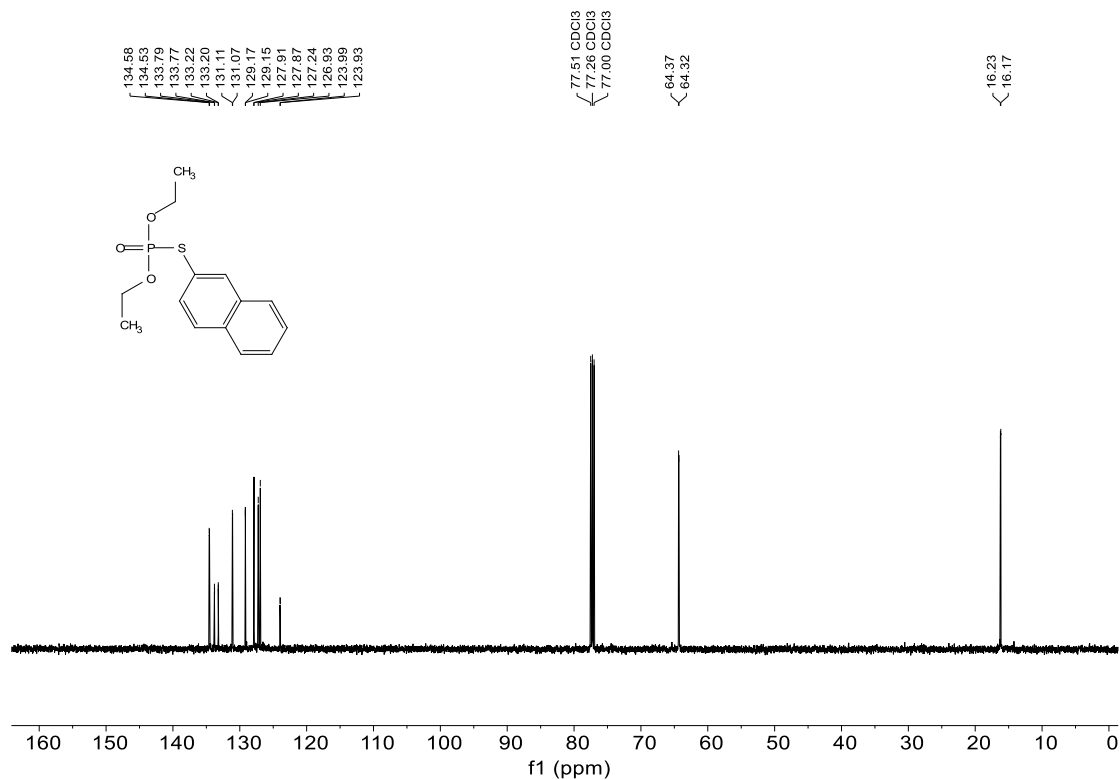

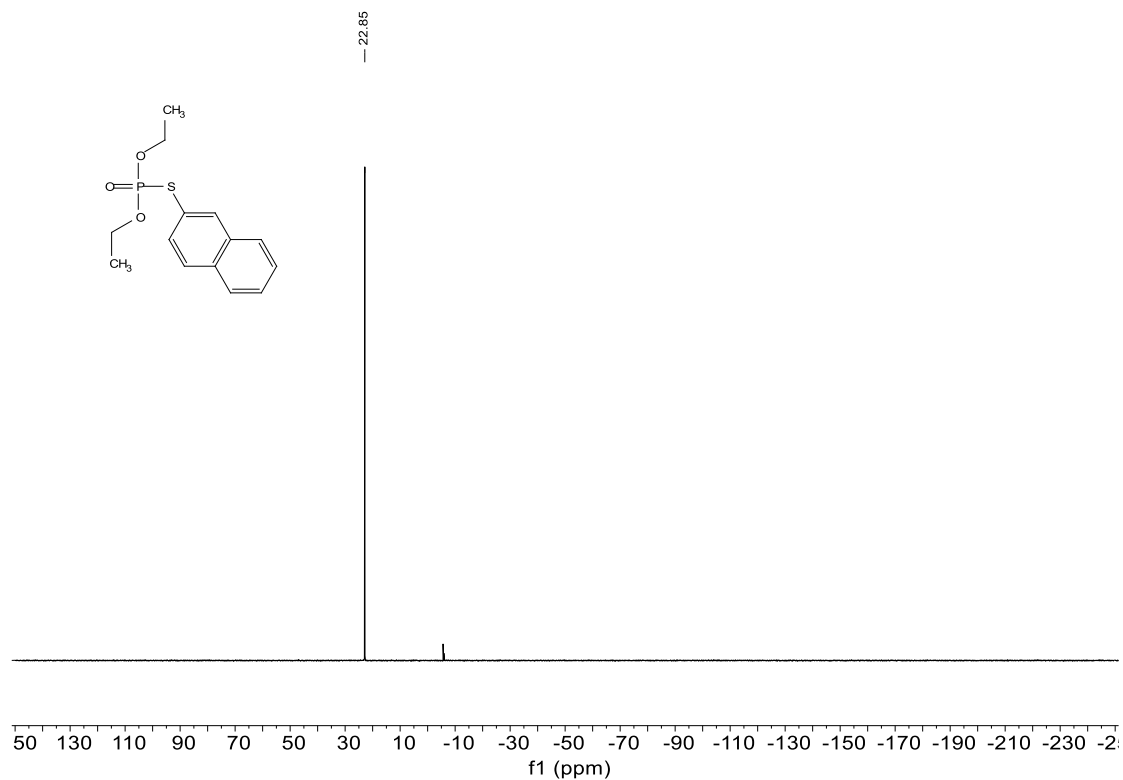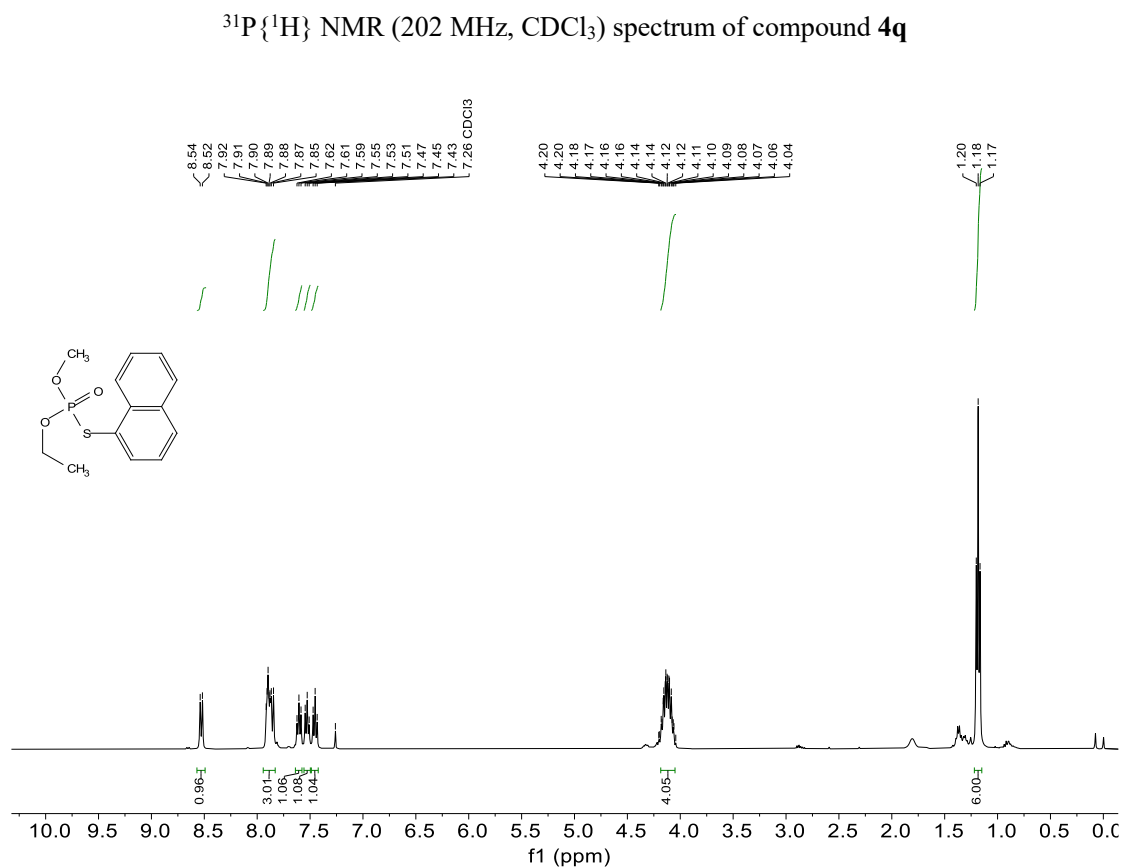

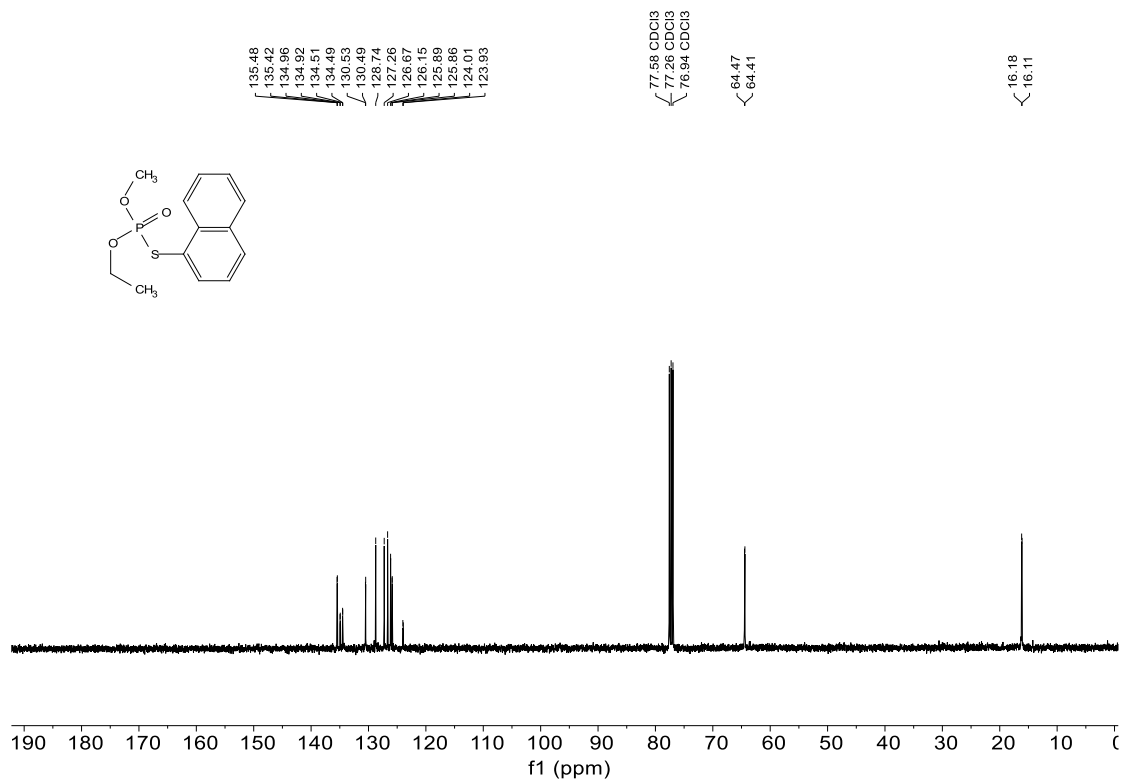

$^{13}\text{C}\{^1\text{H}\}$  NMR (126 MHz,  $\text{CDCl}_3$ ) spectrum of compound 4r

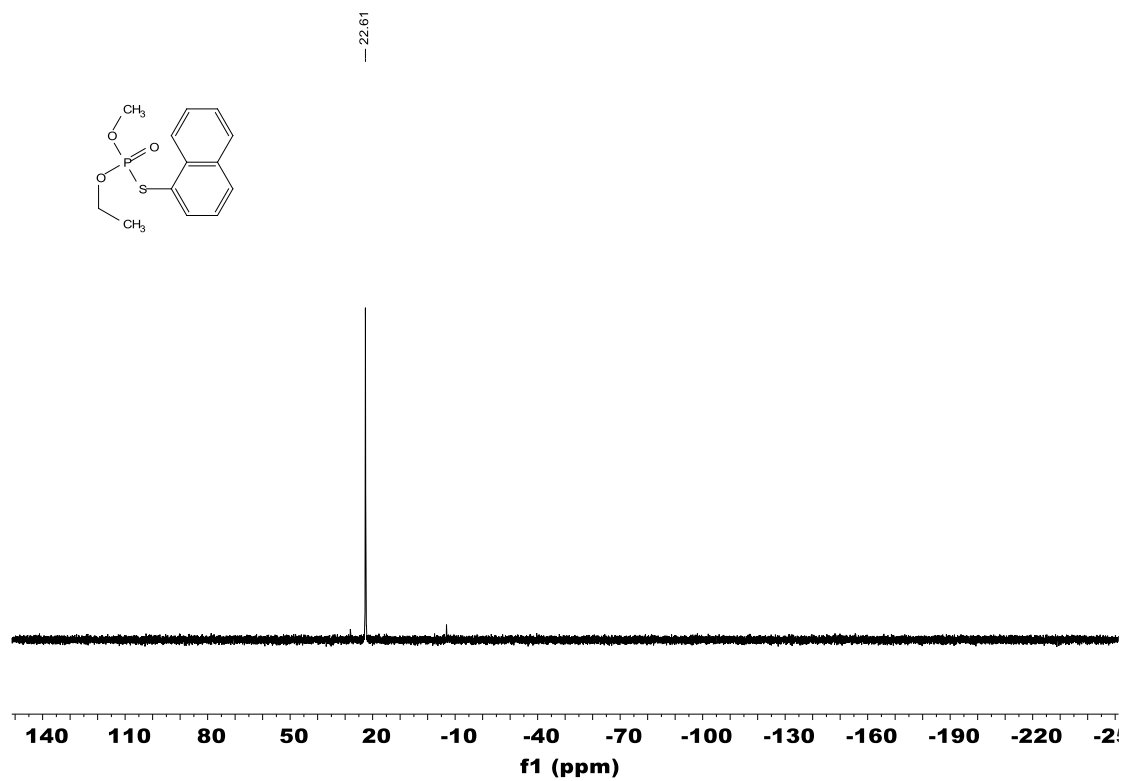

$^{31}\text{P}\{^1\text{H}\}$  NMR (202 MHz,  $\text{CDCl}_3$ ) spectrum of compound 4r

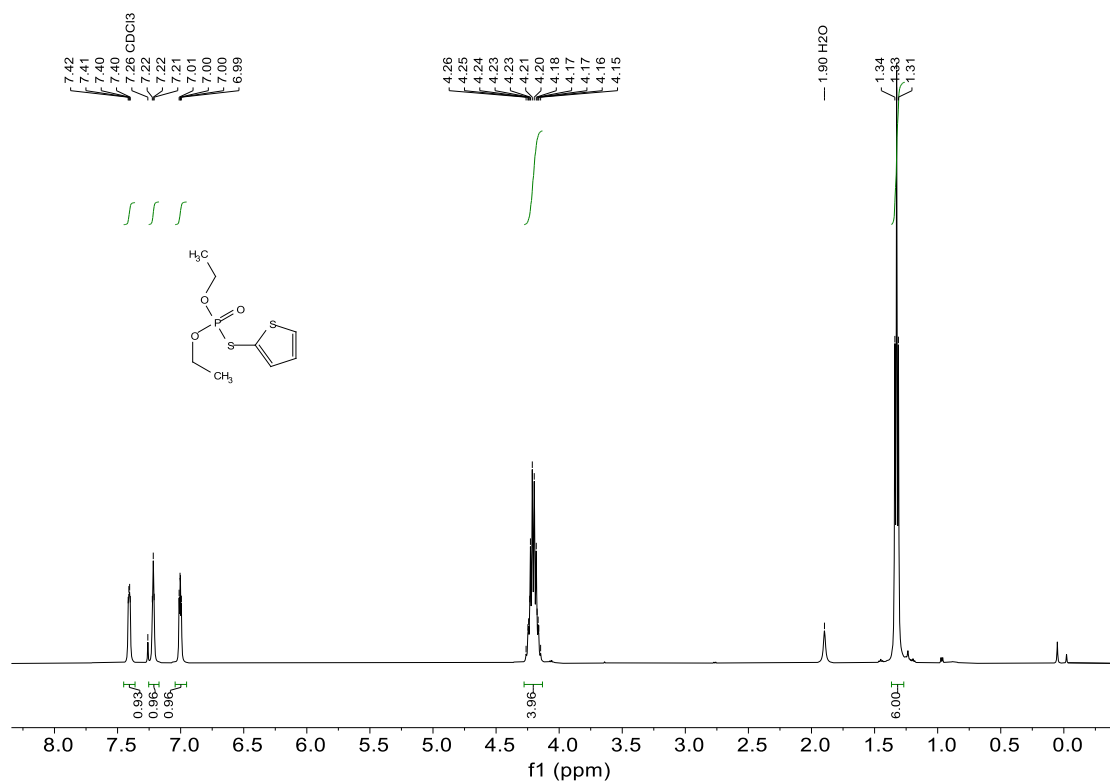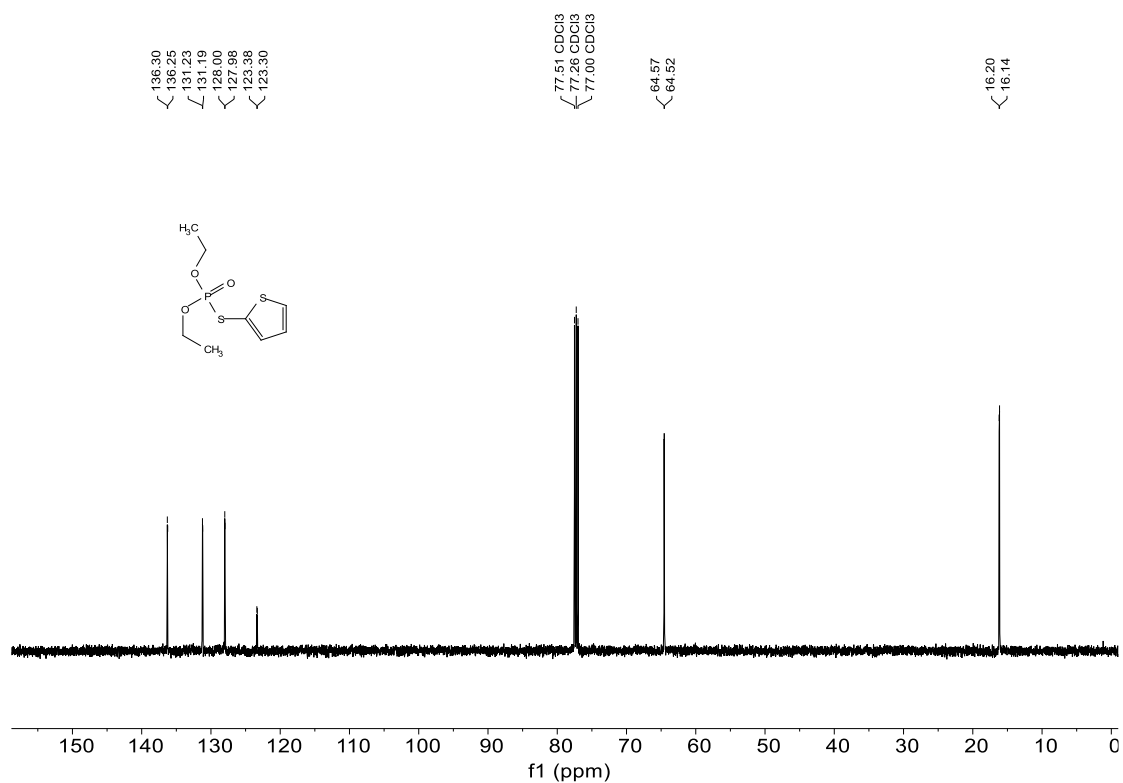

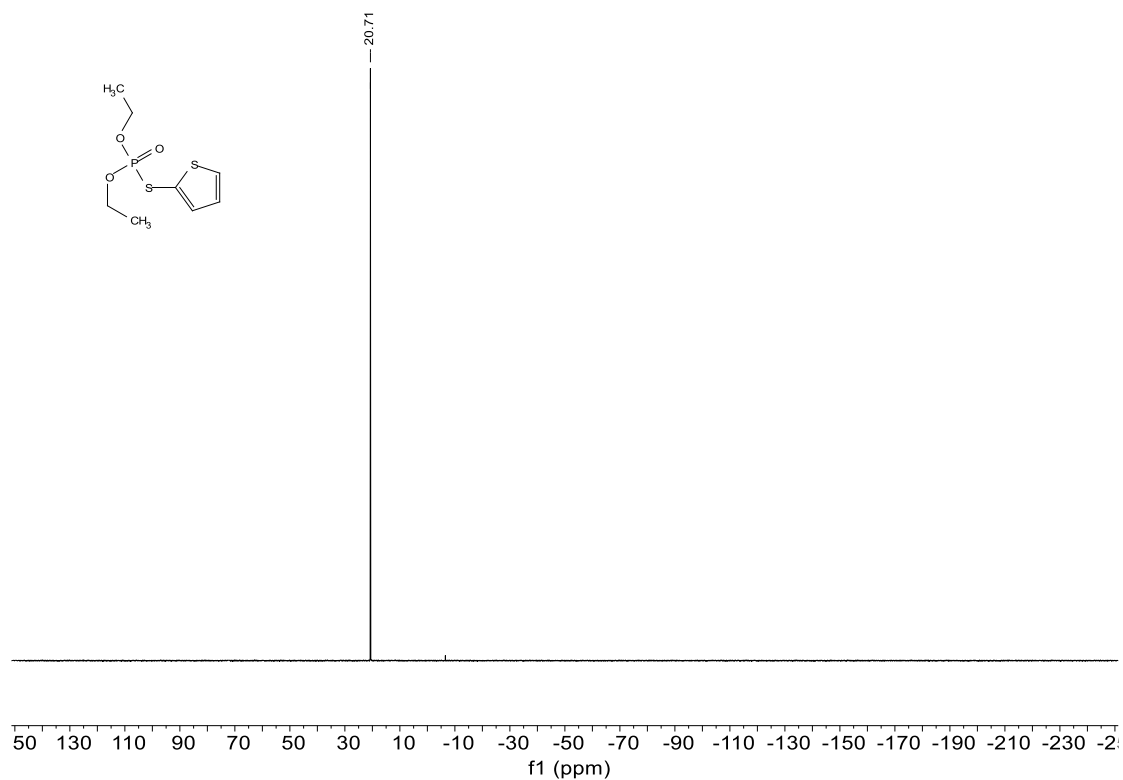

$^{31}\text{P}\{^1\text{H}\}$  NMR (202 MHz,  $\text{CDCl}_3$ ) spectrum of compound **4s**

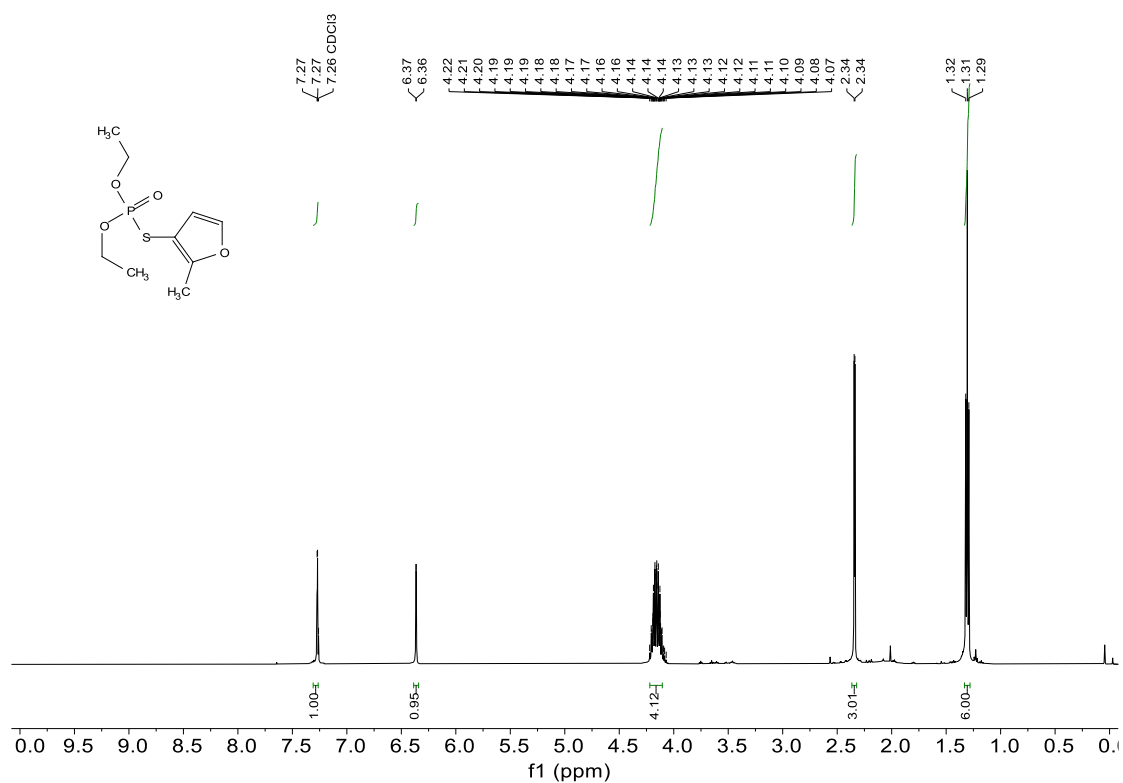

$^1\text{H}$  NMR (500 MHz,  $\text{CDCl}_3$ ) spectrum of compound **4t**



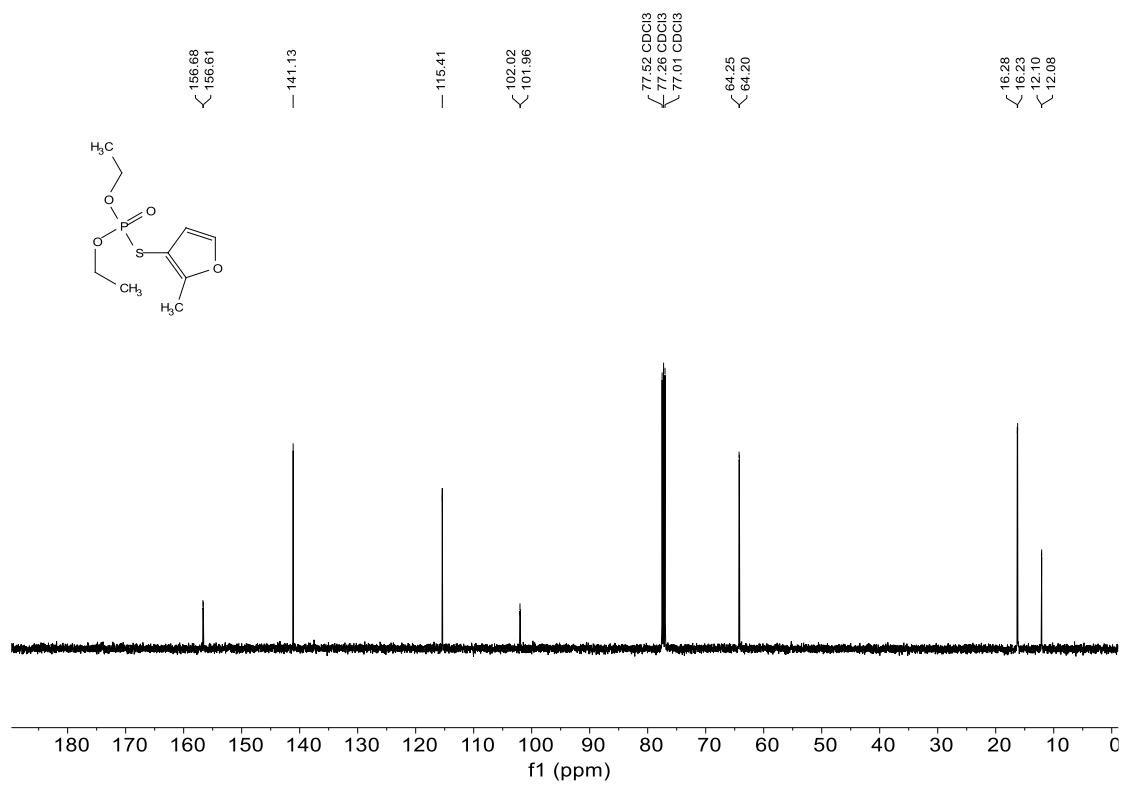

$^{13}\text{C}\{^1\text{H}\}$  NMR (126 MHz,  $\text{CDCl}_3$ ) spectrum of compound **4t**

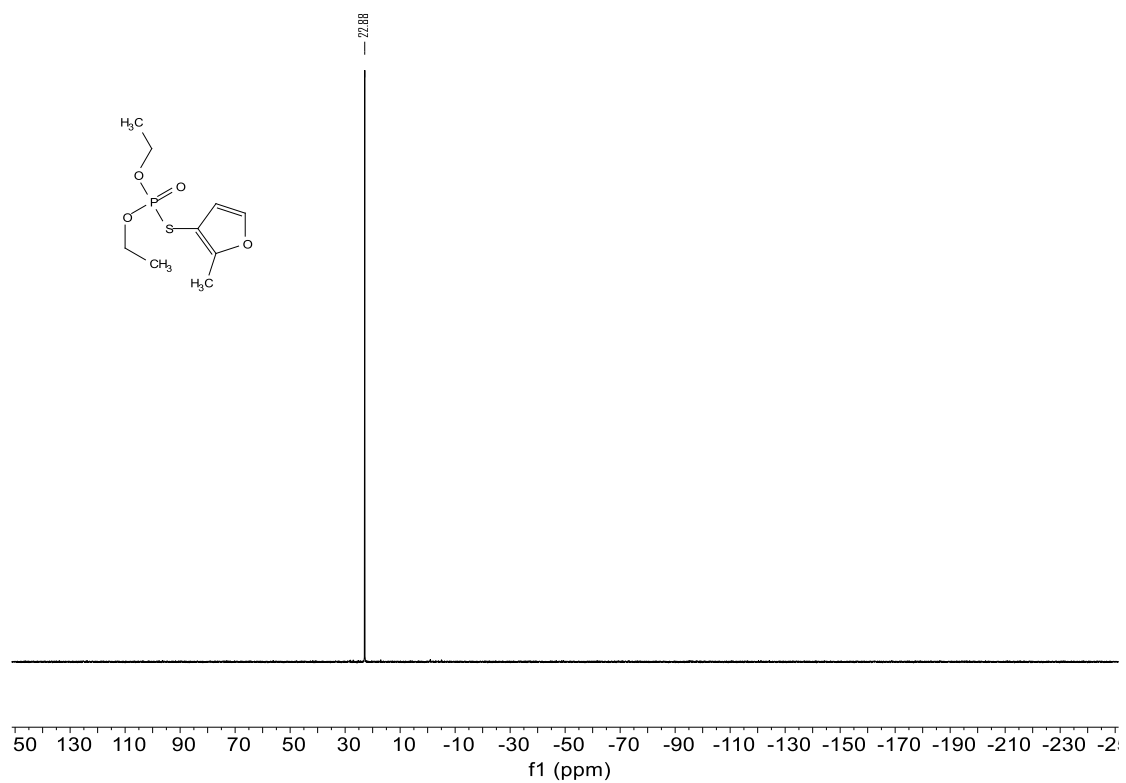

$^{31}\text{P}\{^1\text{H}\}$  NMR (202 MHz,  $\text{CDCl}_3$ ) spectrum of compound **4t**

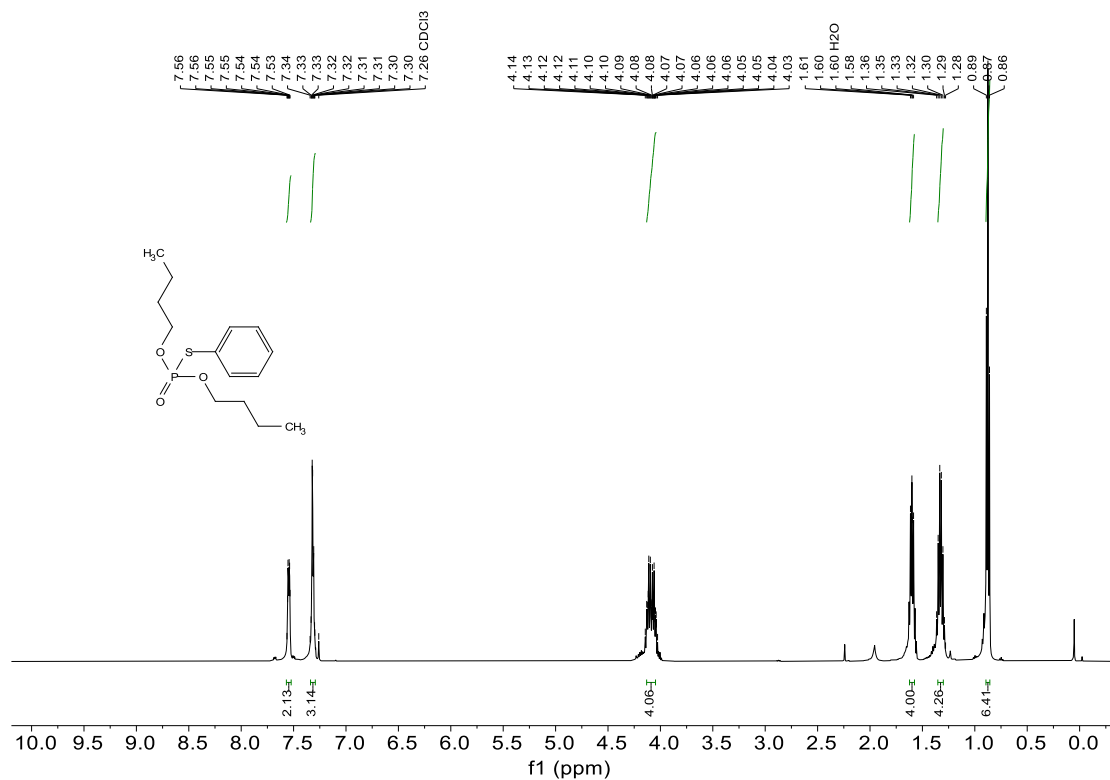

$^1\text{H NMR}$  (500 MHz,  $\text{CDCl}_3$ ) spectrum of compound **5a**

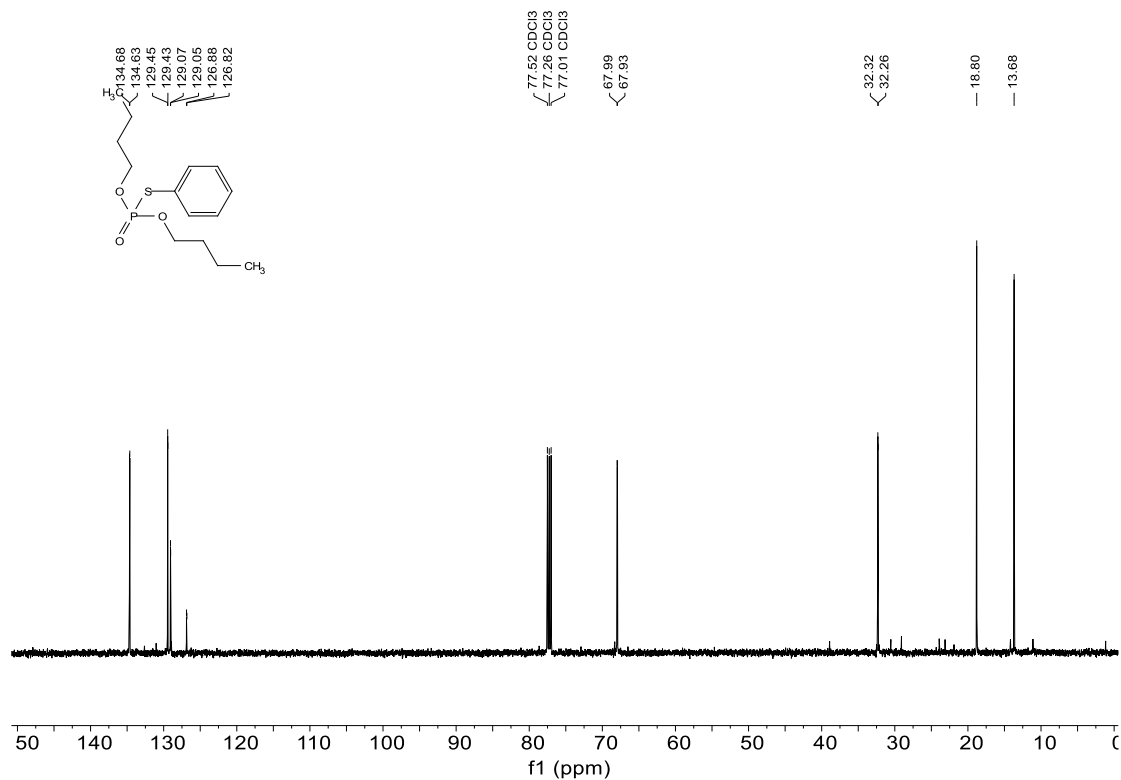

$^{13}\text{C}\{^1\text{H}\}$  NMR (126 MHz,  $\text{CDCl}_3$ ) spectrum of compound **5a**

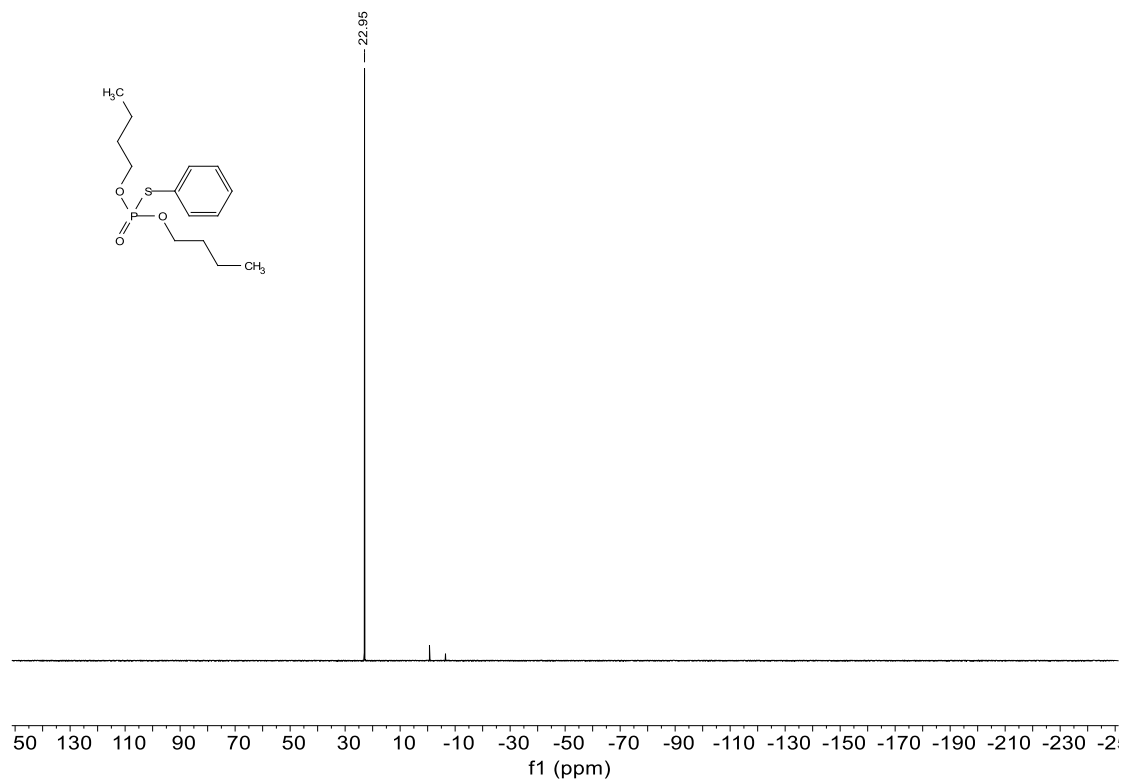

$^{31}\text{P}\{^1\text{H}\}$  NMR (202 MHz,  $\text{CDCl}_3$ ) spectrum of compound **5a**

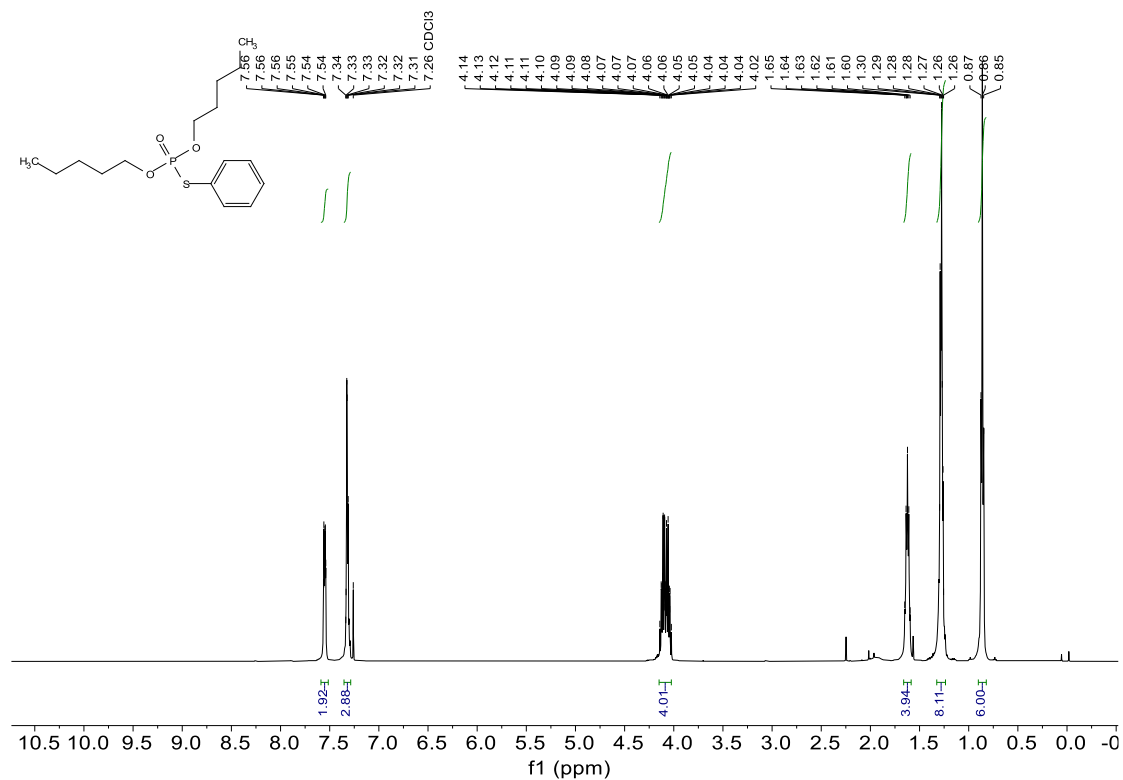

$^1\text{H}$  NMR (500 MHz,  $\text{CDCl}_3$ ) spectrum of compound **5b**

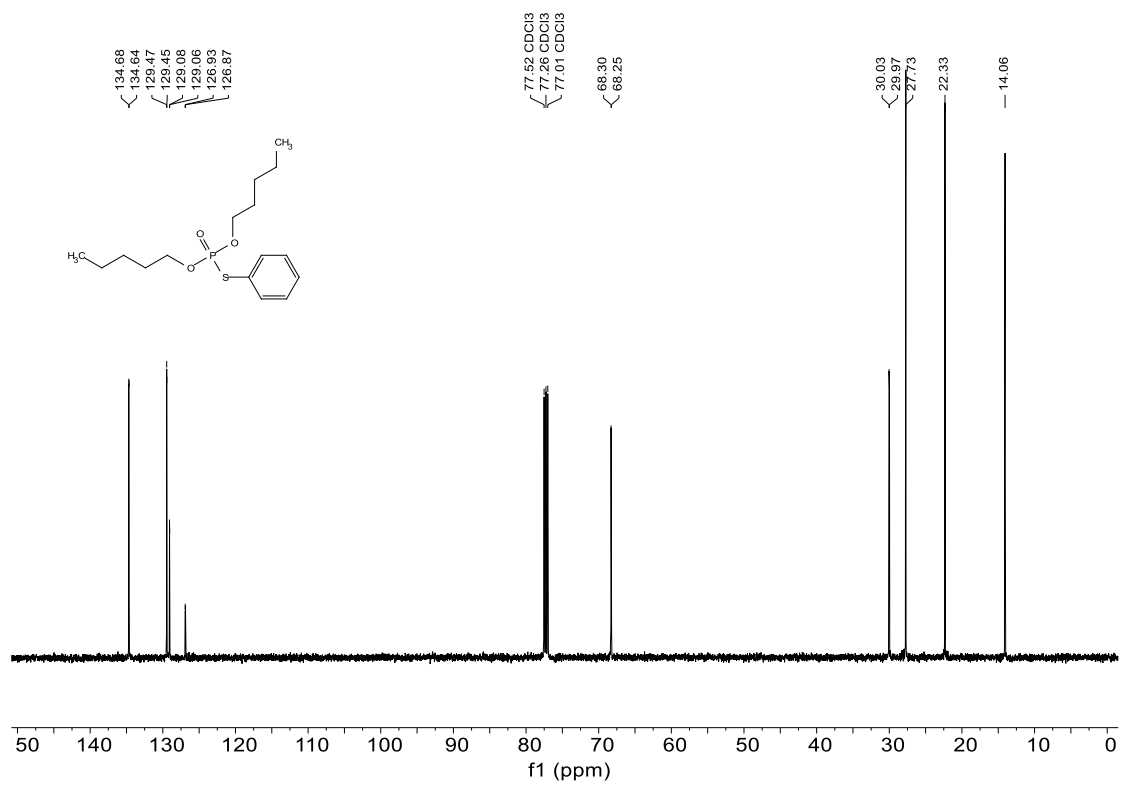

$^{13}\text{C}\{^1\text{H}\}$  NMR (126 MHz,  $\text{CDCl}_3$ ) spectrum of compound **5b**

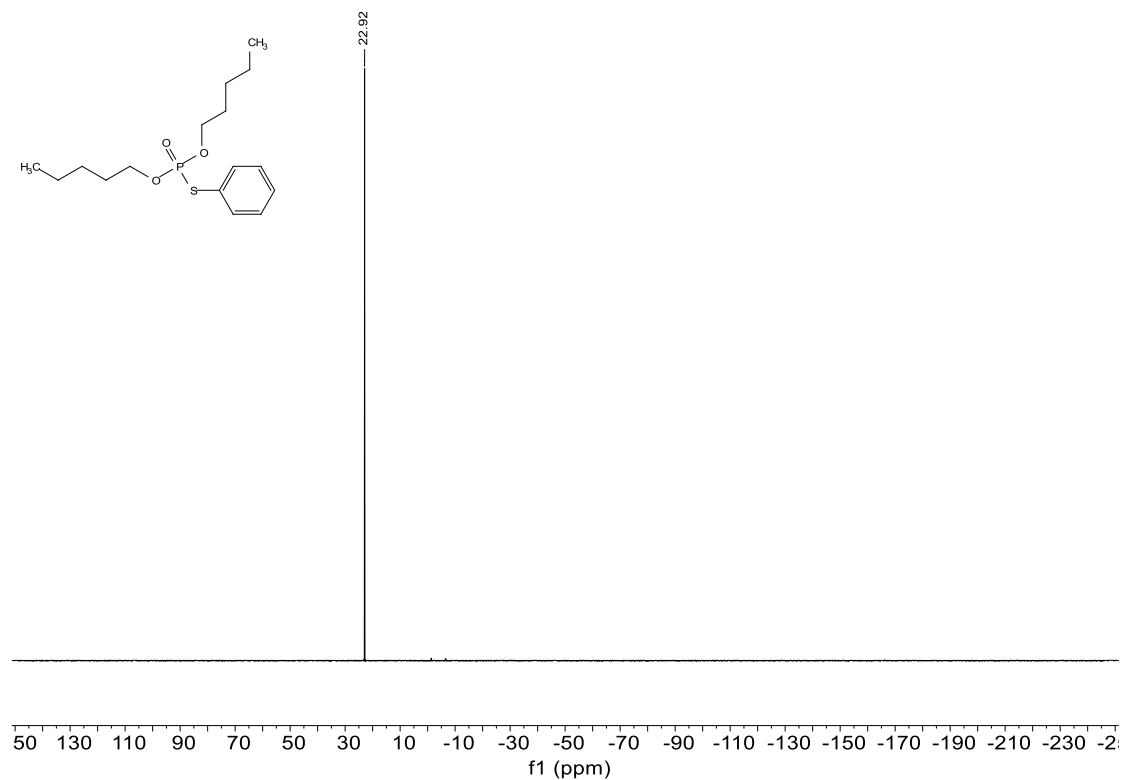

$^{31}\text{P}\{^1\text{H}\}$  NMR (202 MHz,  $\text{CDCl}_3$ ) spectrum of compound **5b**

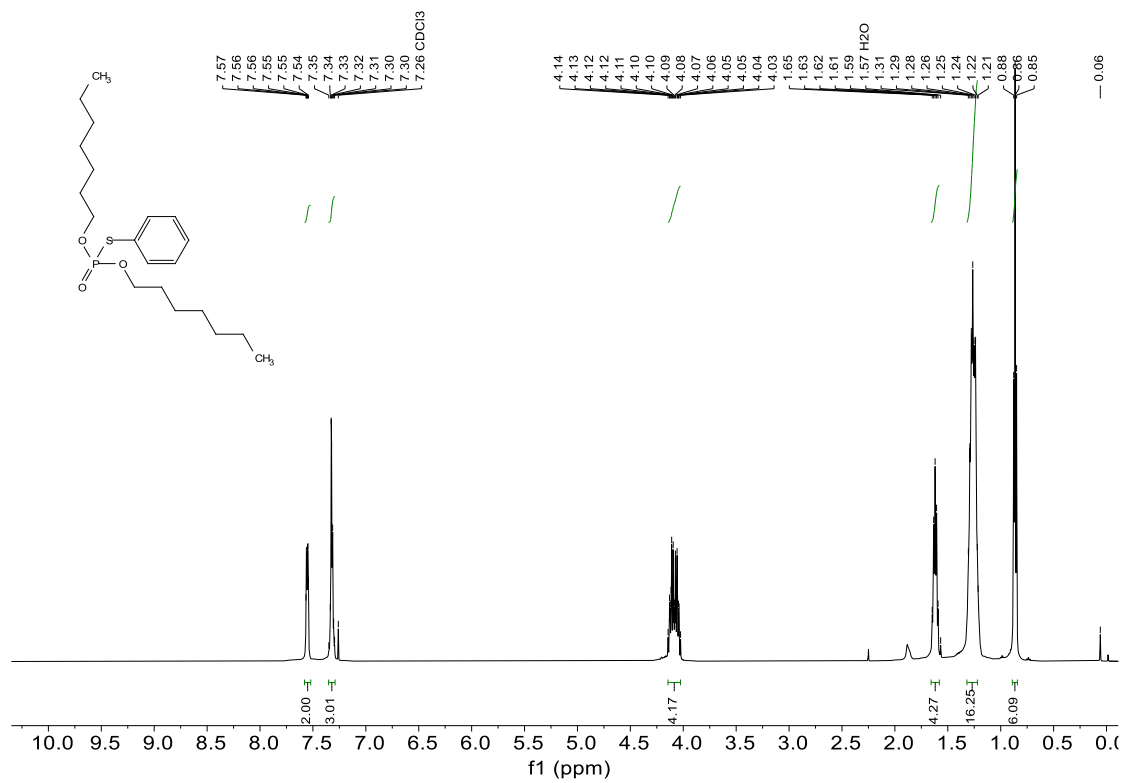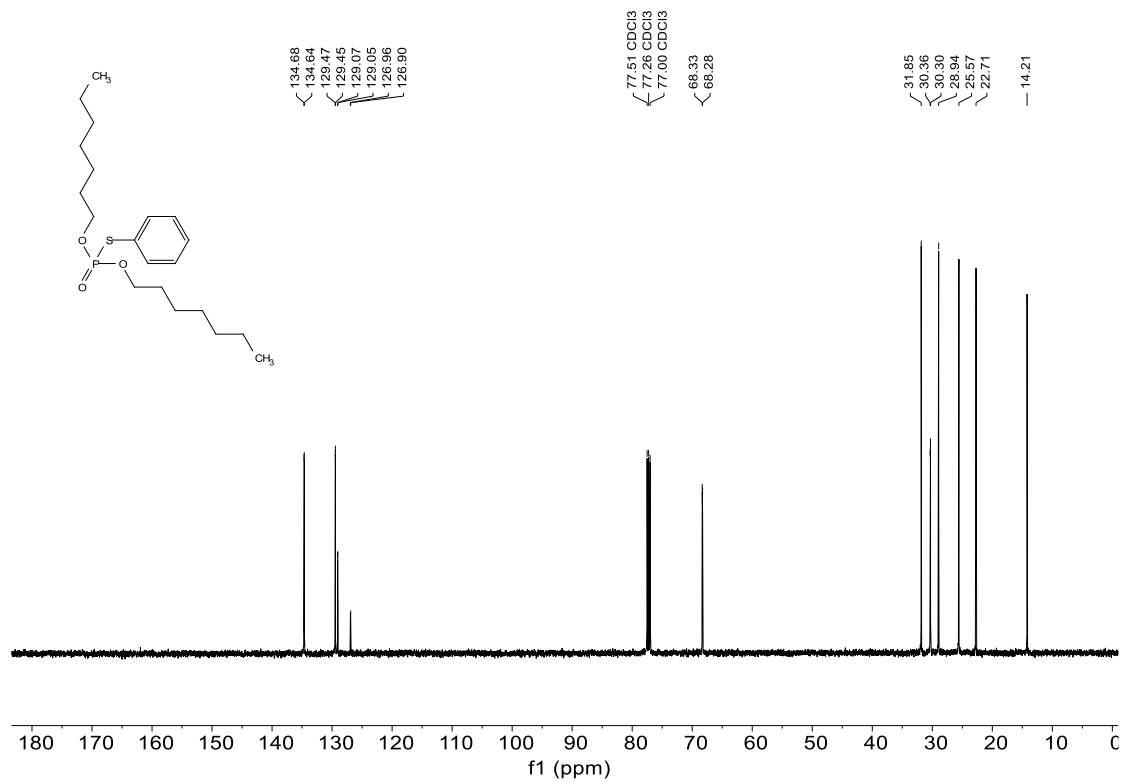

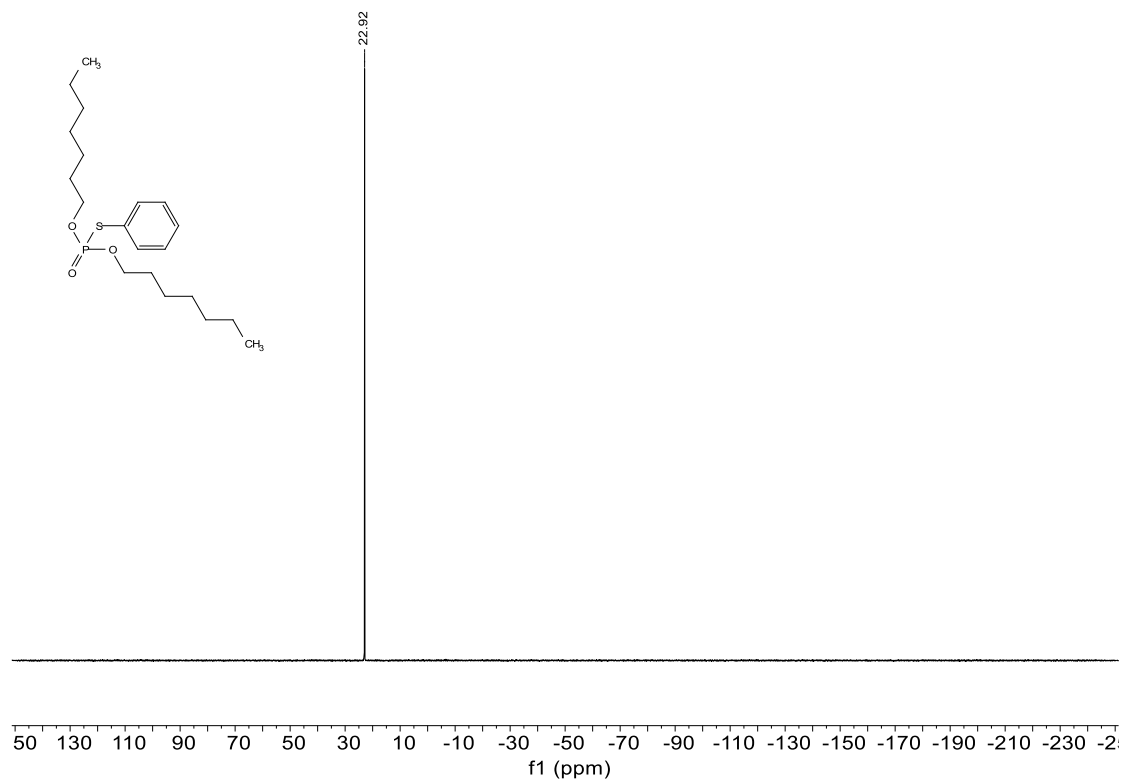

$^{31}\text{P}$  { $^1\text{H}$ } NMR (202 MHz,  $\text{CDCl}_3$ ) spectrum of compound **5c**

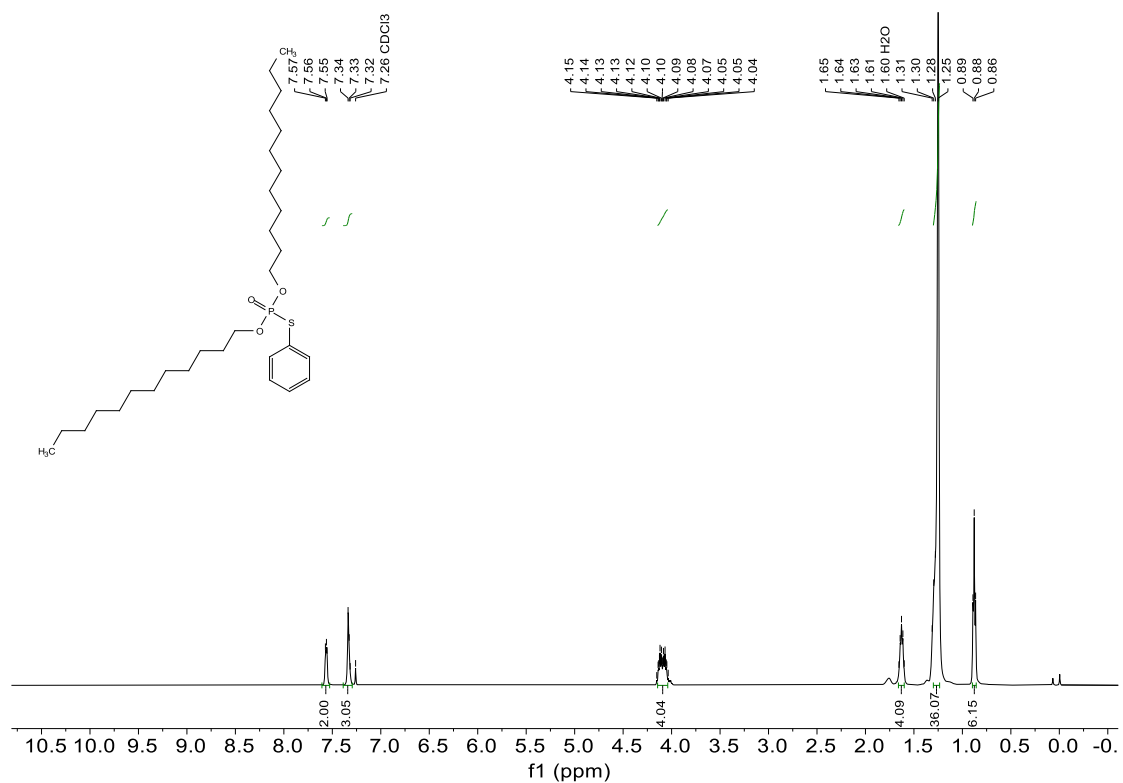

$^1\text{H}$  NMR (500 MHz,  $\text{CDCl}_3$ ) spectrum of compound **5d**

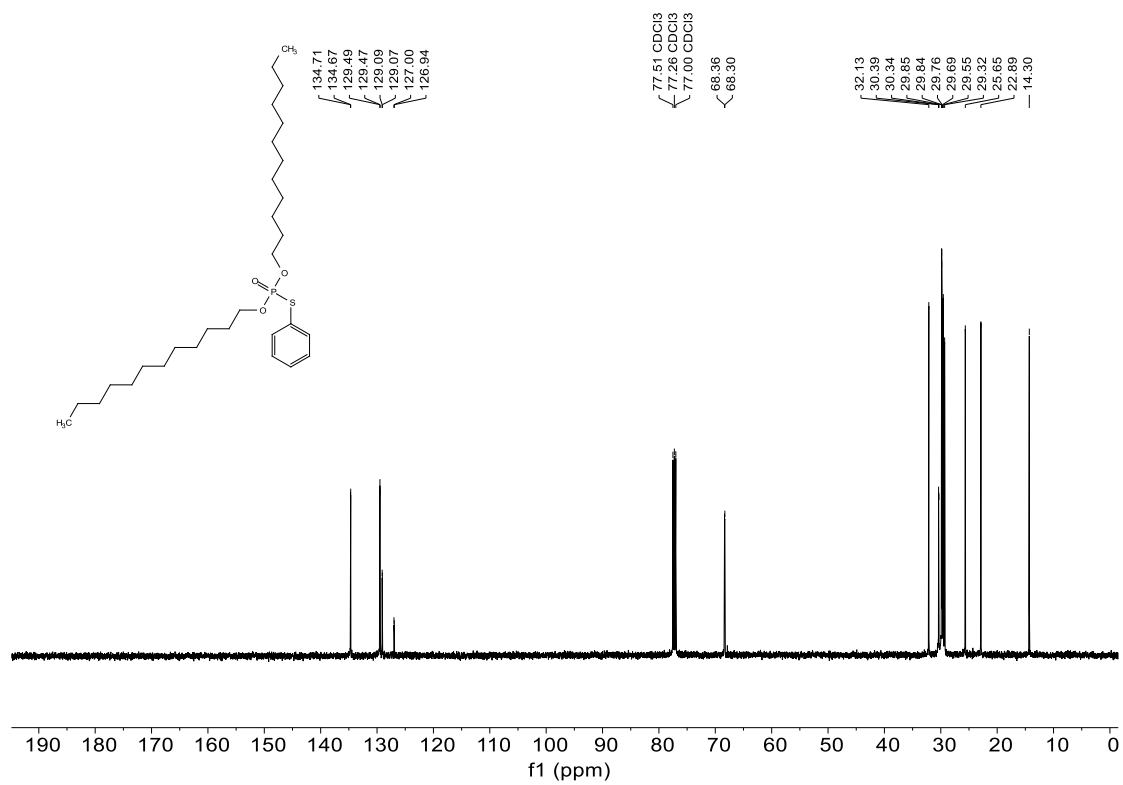

$^{13}\text{C}\{^1\text{H}\}$  NMR (126 MHz,  $\text{CDCl}_3$ ) spectrum of compound **5d**

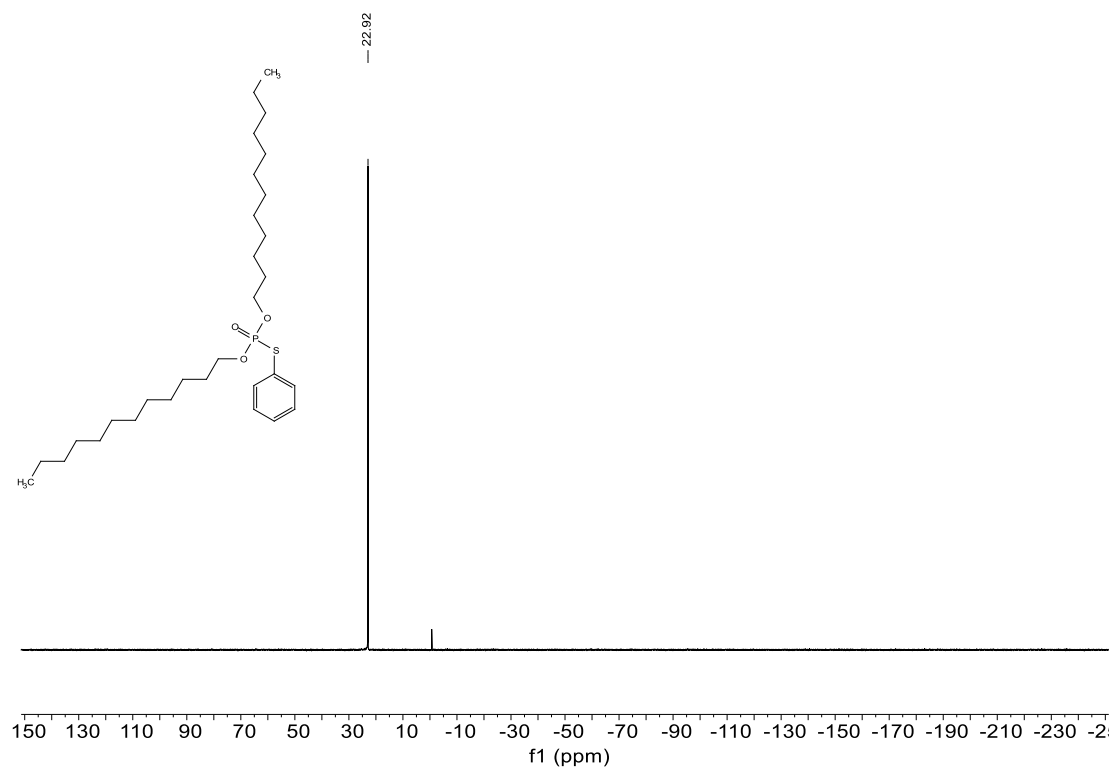

$^{31}\text{P}\{^1\text{H}\}$  NMR (202 MHz,  $\text{CDCl}_3$ ) spectrum of compound **5d**

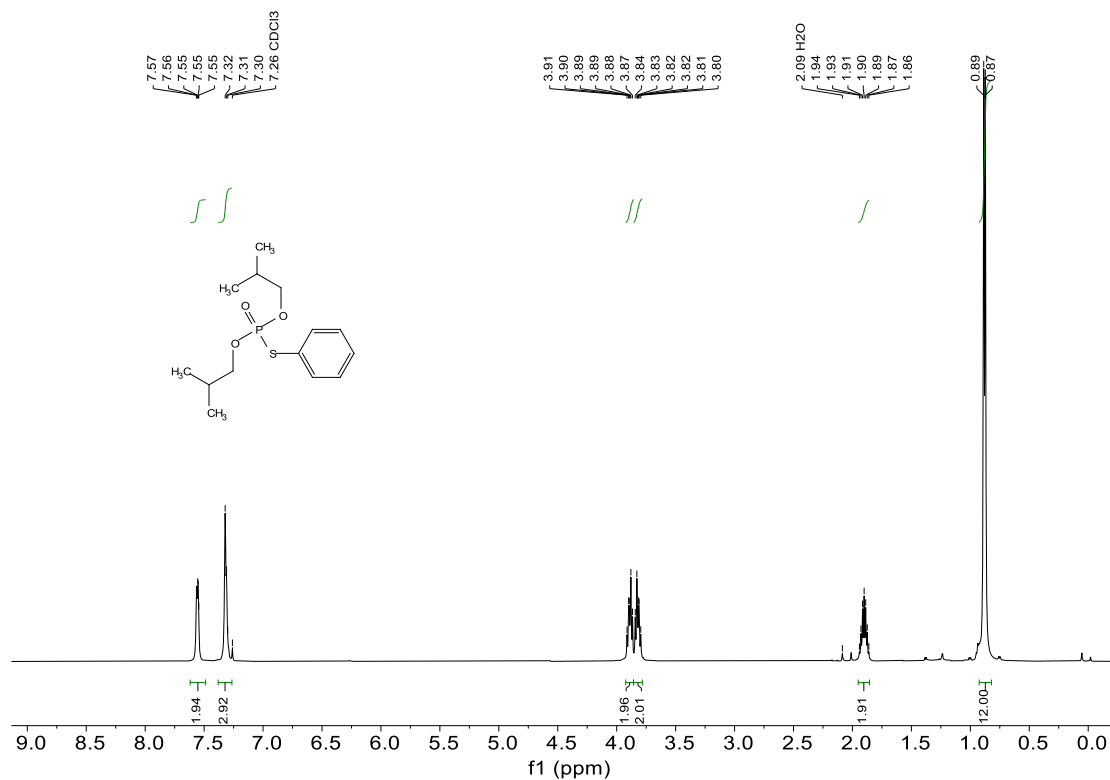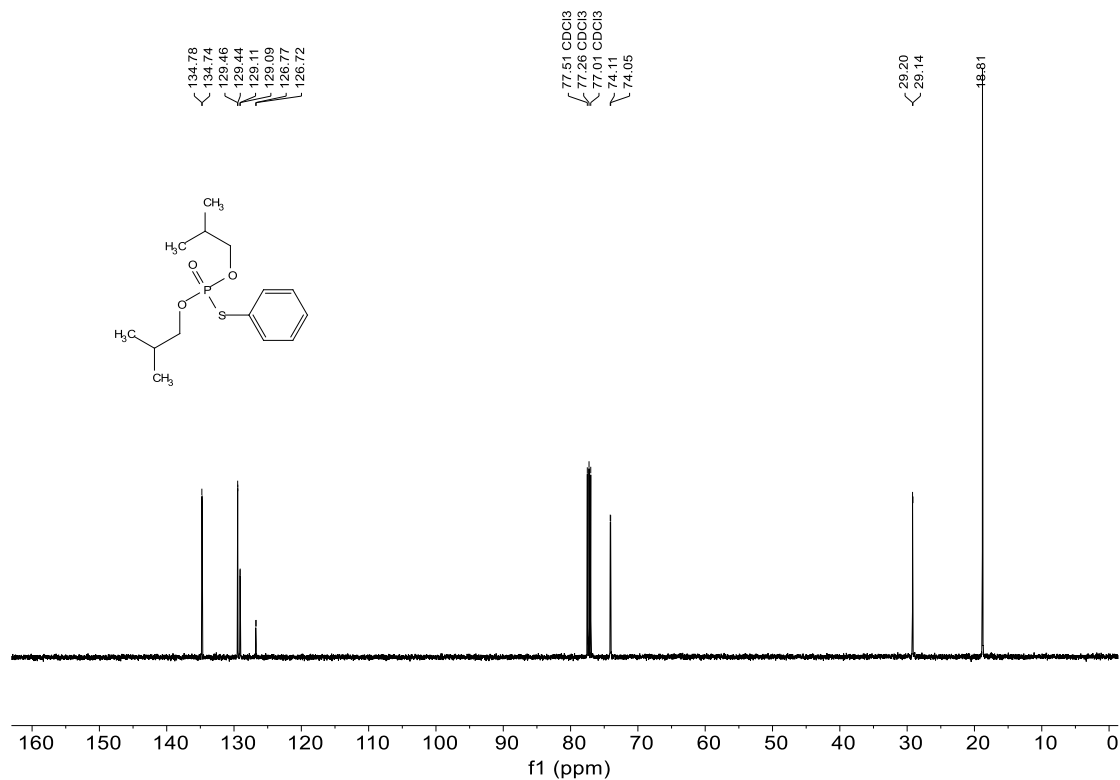









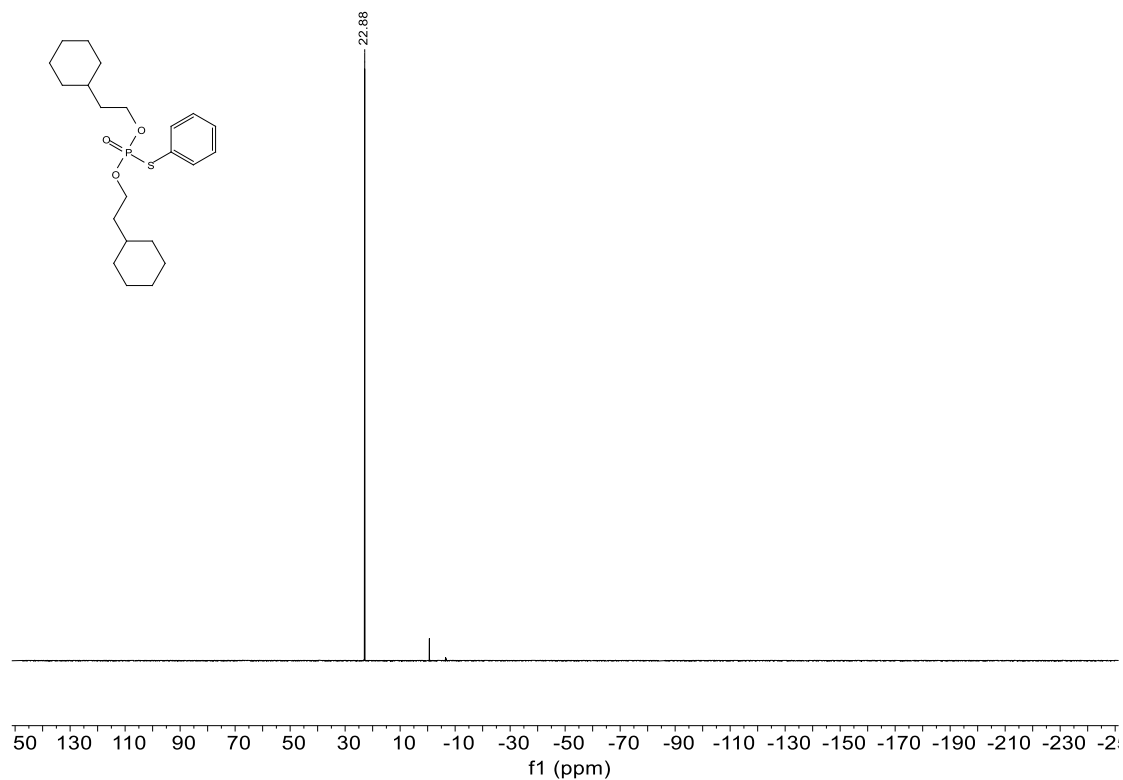

$^{31}\text{P}$   $\{^1\text{H}\}$  NMR (202 MHz,  $\text{CDCl}_3$ ) spectrum of compound **5g**

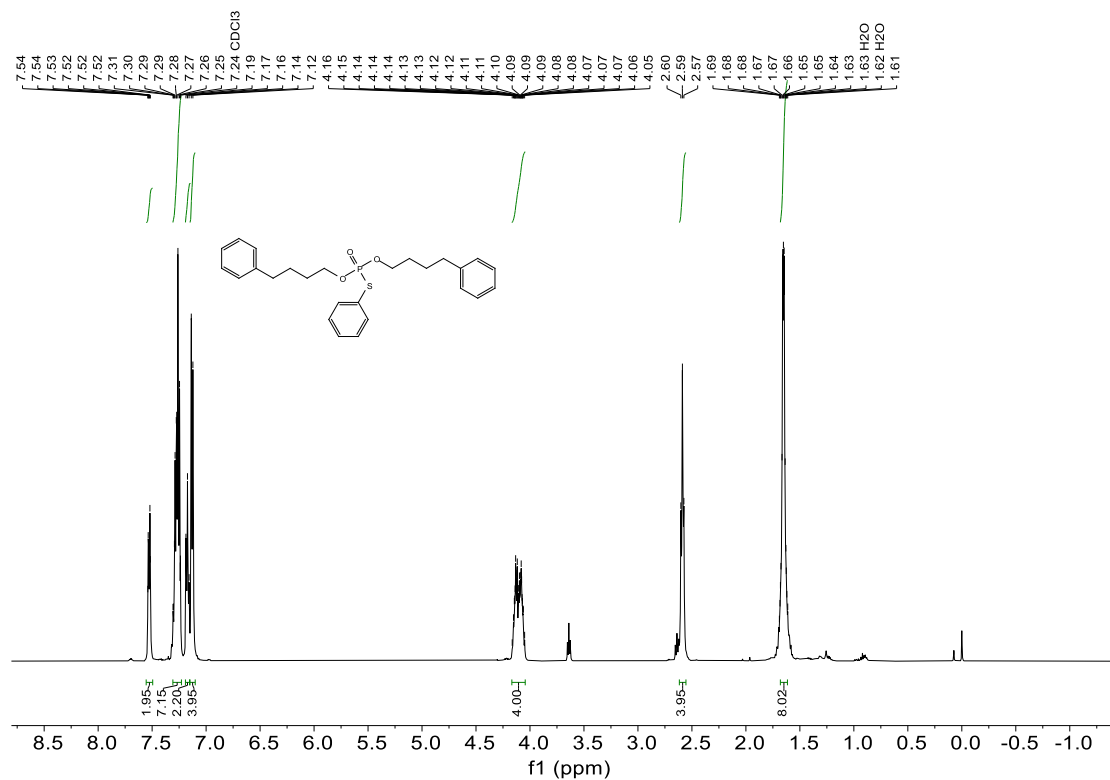

$^1\text{H}$  NMR (500 MHz,  $\text{CDCl}_3$ ) spectrum of compound **5h**

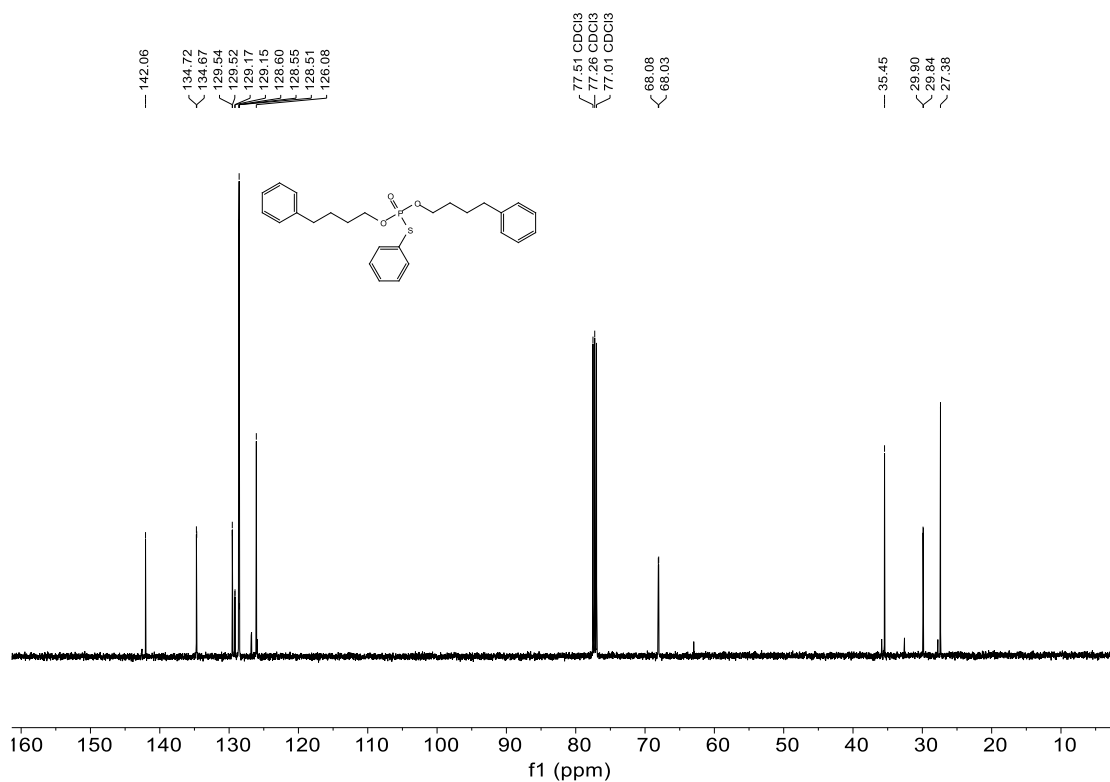

$^{13}\text{C}\{^1\text{H}\}$  NMR (126 MHz,  $\text{CDCl}_3$ ) spectrum of compound **5h**

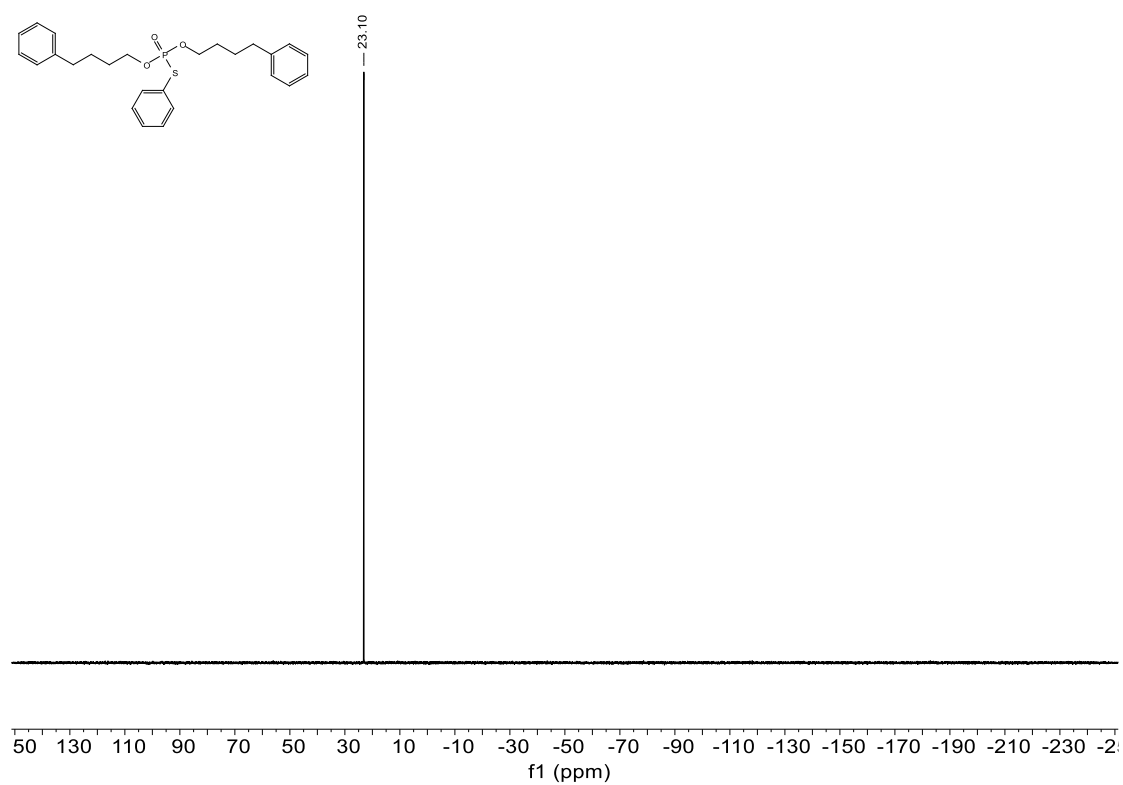

$^{31}\text{P}\{^1\text{H}\}$  NMR (202 MHz,  $\text{CDCl}_3$ ) spectrum of compound **5h**

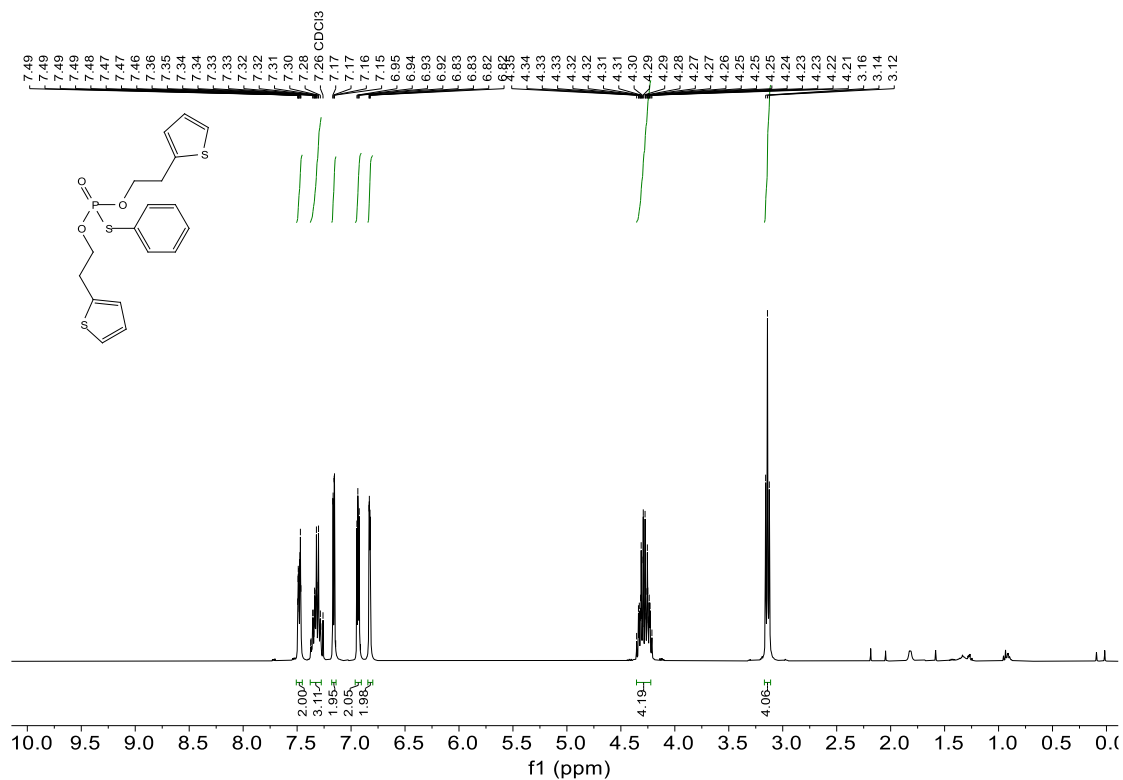

$^1\text{H NMR}$  (400 MHz,  $\text{CDCl}_3$ ) spectrum of compound **5i**

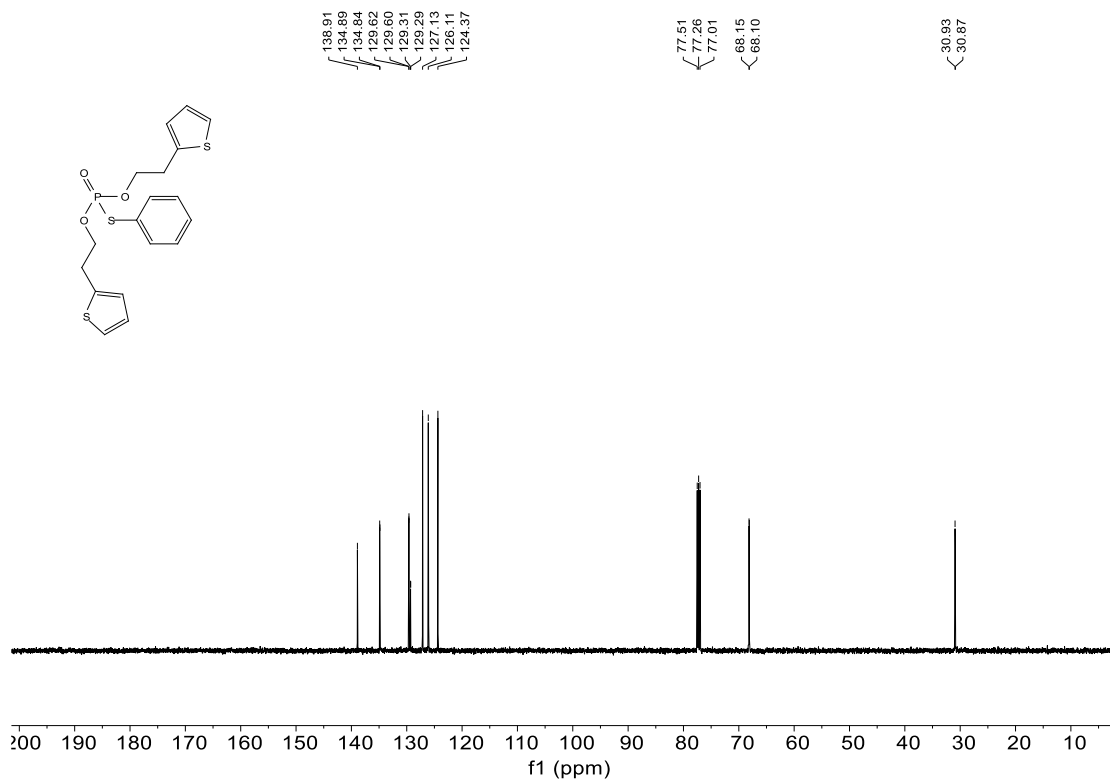

$^{13}\text{C}\{^1\text{H}\}$  NMR (101 MHz,  $\text{CDCl}_3$ ) spectrum of compound **5i**

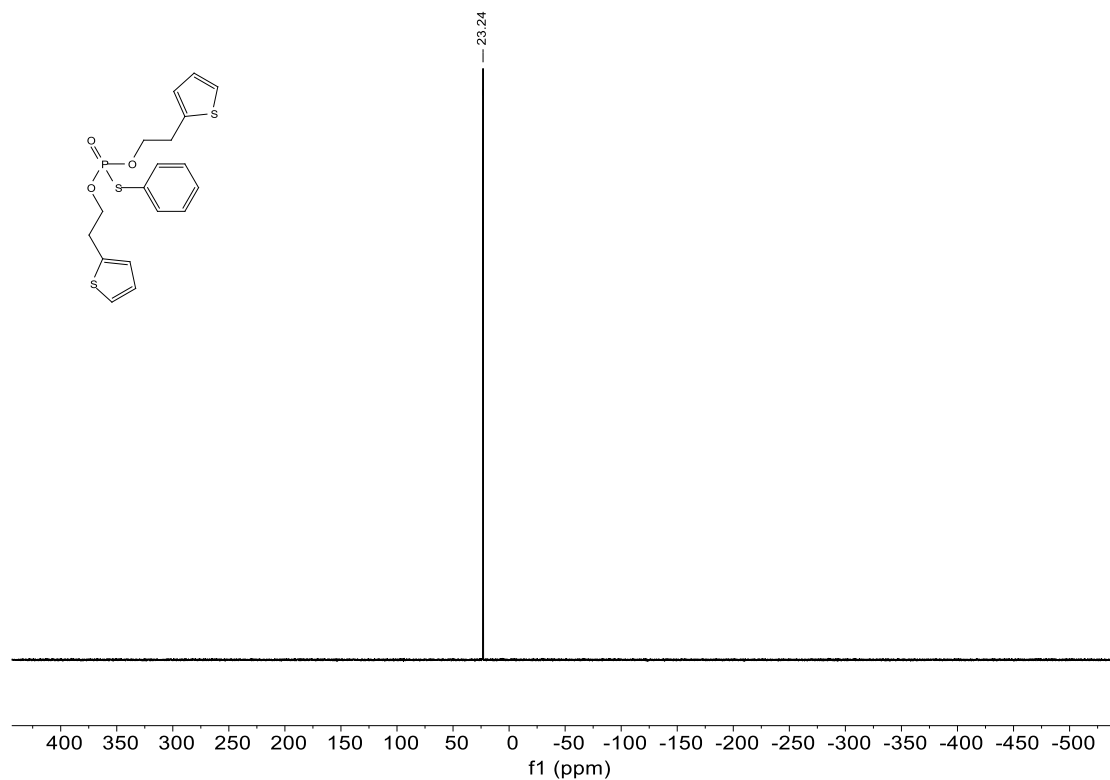

$^{31}\text{P}\{^1\text{H}\}$  NMR (202 MHz,  $\text{CDCl}_3$ ) spectrum of compound **5i**

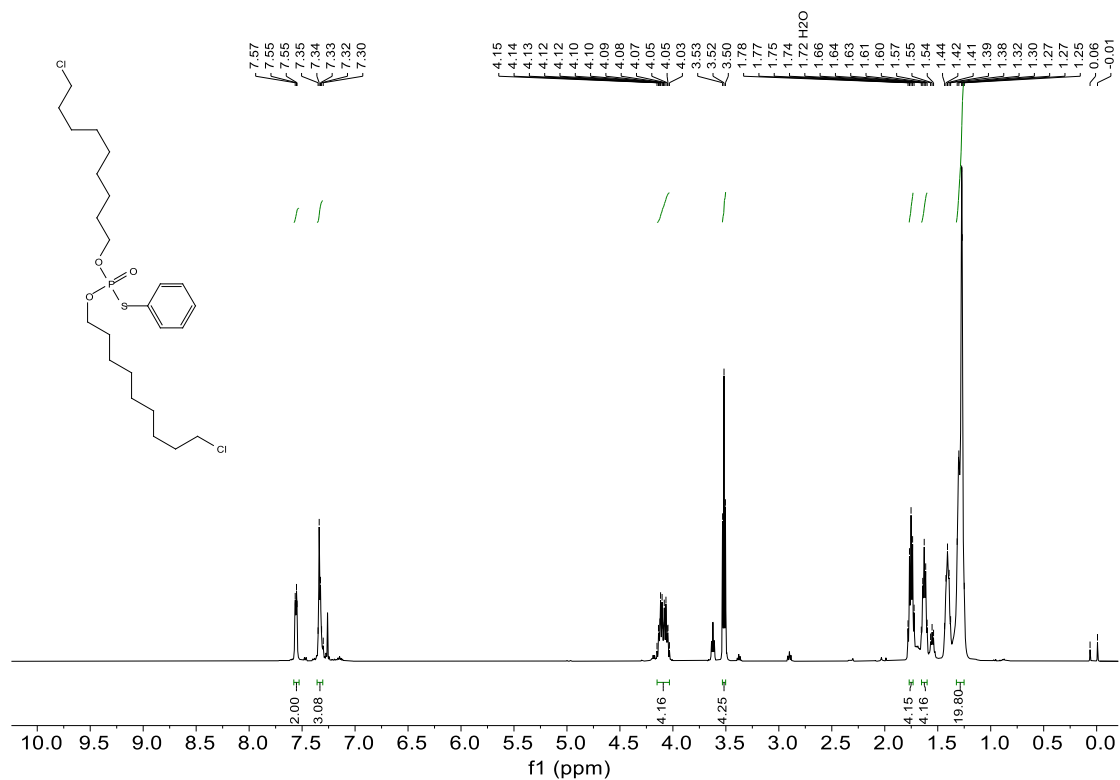

$^1\text{H}$  NMR (500 MHz,  $\text{CDCl}_3$ ) spectrum of compound **5j**

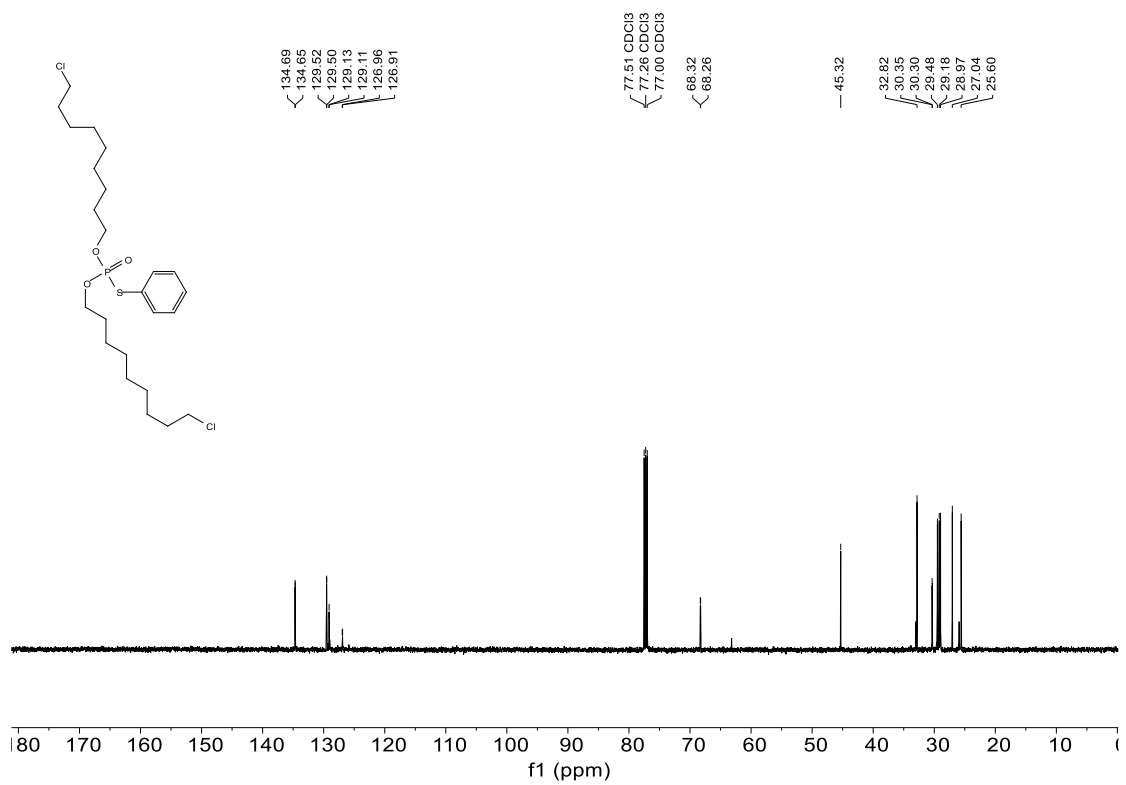

$^{13}\text{C}\{^1\text{H}\}$  NMR (126 MHz,  $\text{CDCl}_3$ ) spectrum of compound **5j**

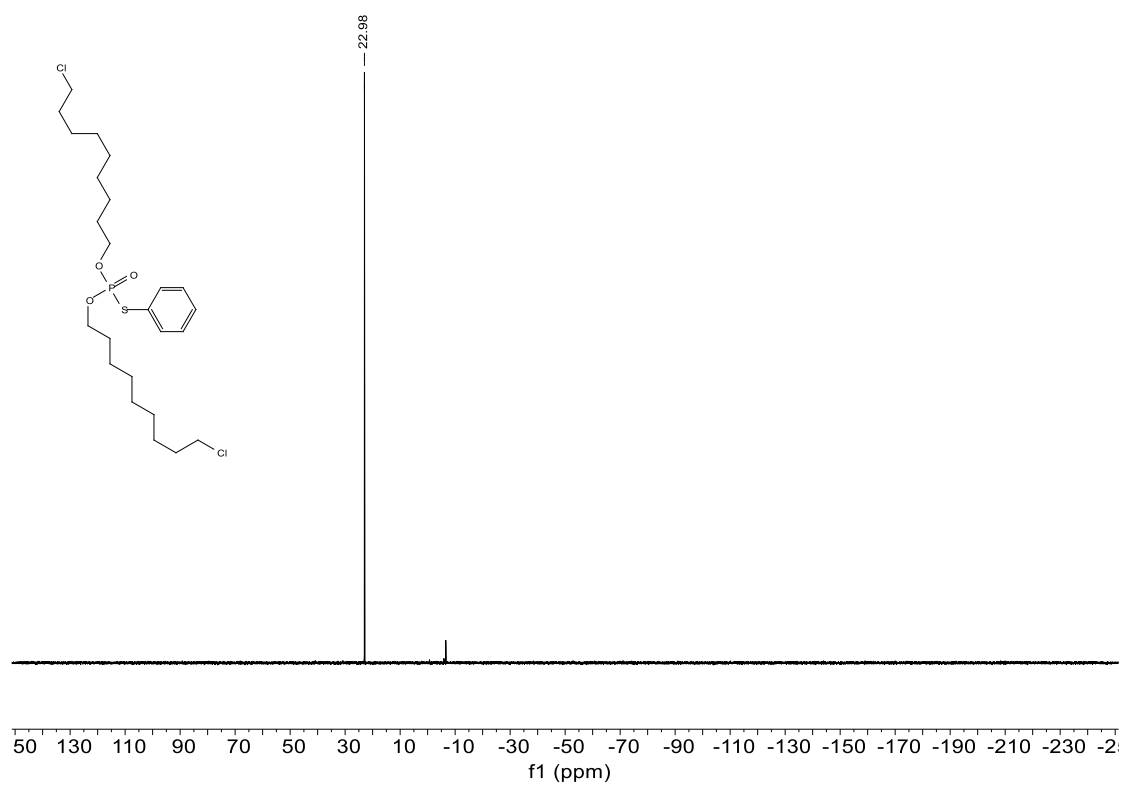

$^{31}\text{P}\{^1\text{H}\}$  NMR (202 MHz,  $\text{CDCl}_3$ ) spectrum of compound **5j**



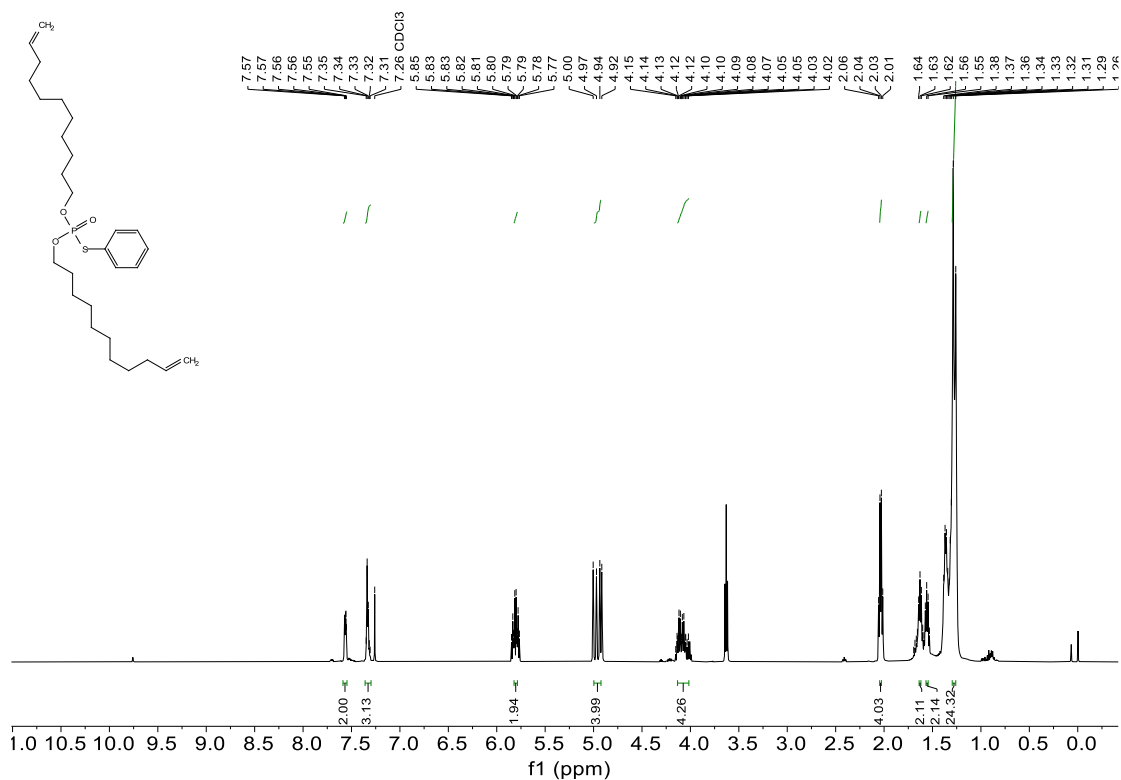

<sup>1</sup>H NMR (500 MHz, CDCl<sub>3</sub>) spectrum of compound **5k**

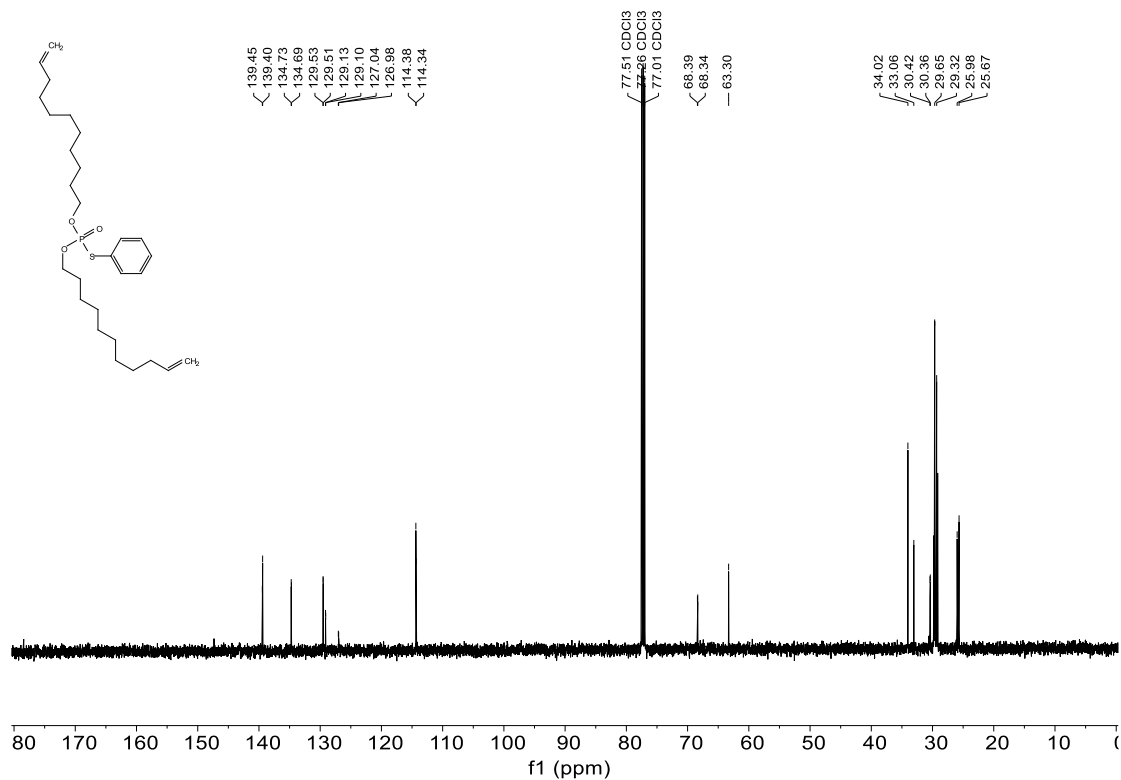

<sup>13</sup>C {<sup>1</sup>H} NMR (126 MHz, CDCl<sub>3</sub>) spectrum of compound **5k**

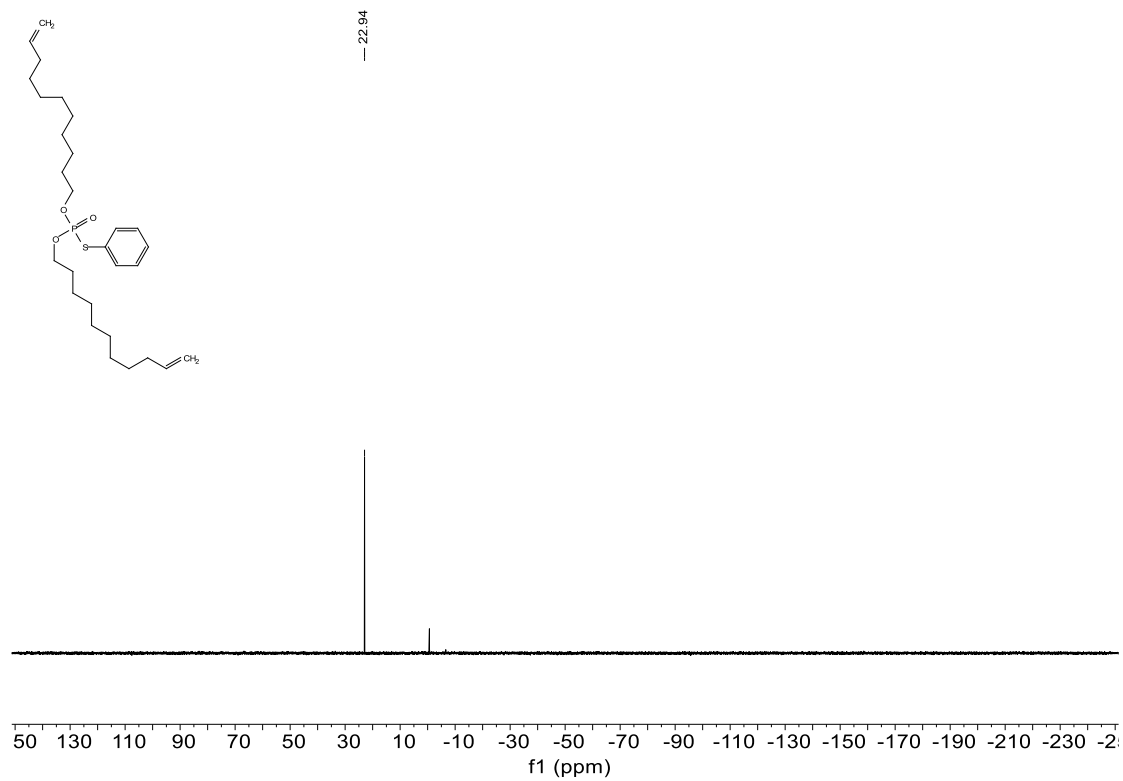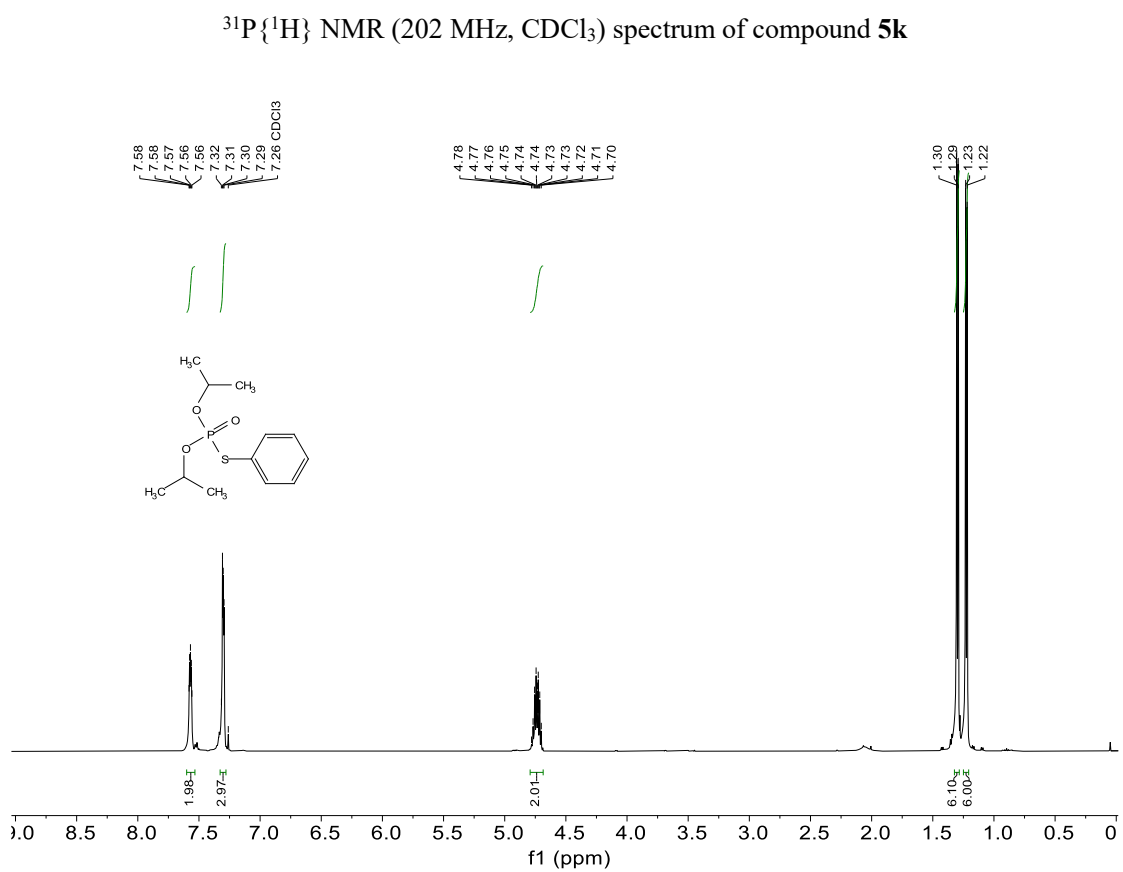

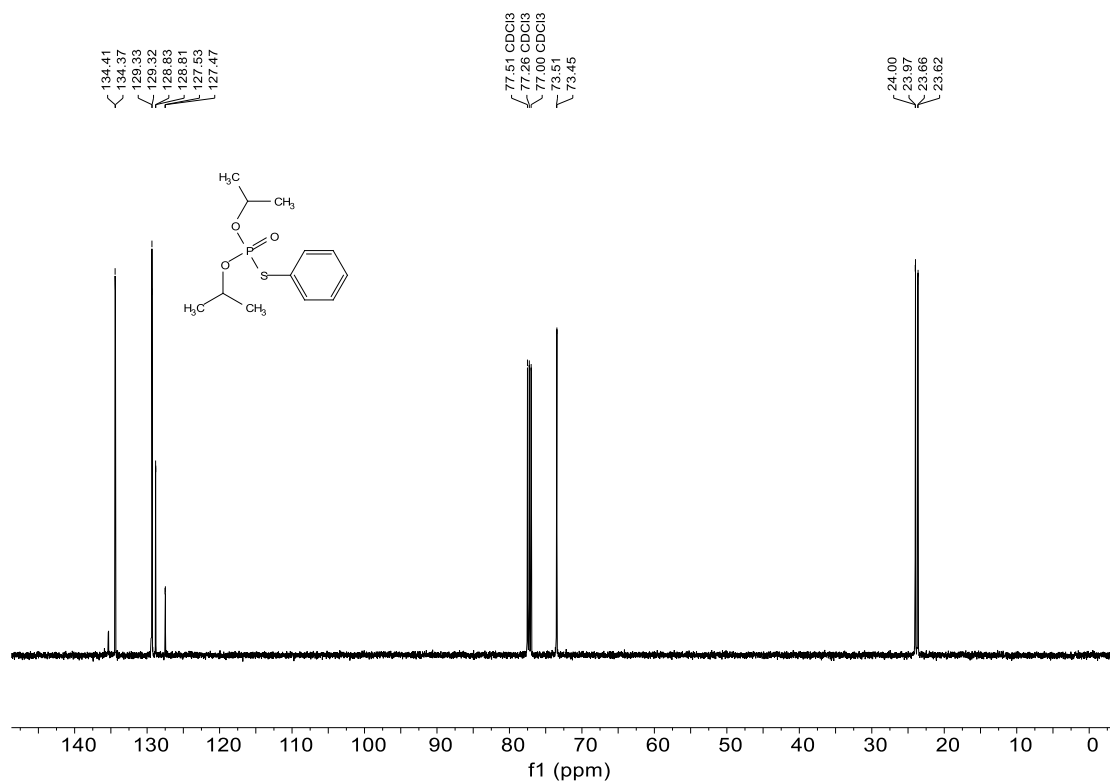

$^{13}\text{C}\{^1\text{H}\}$  NMR (126 MHz,  $\text{CDCl}_3$ ) spectrum of compound 51

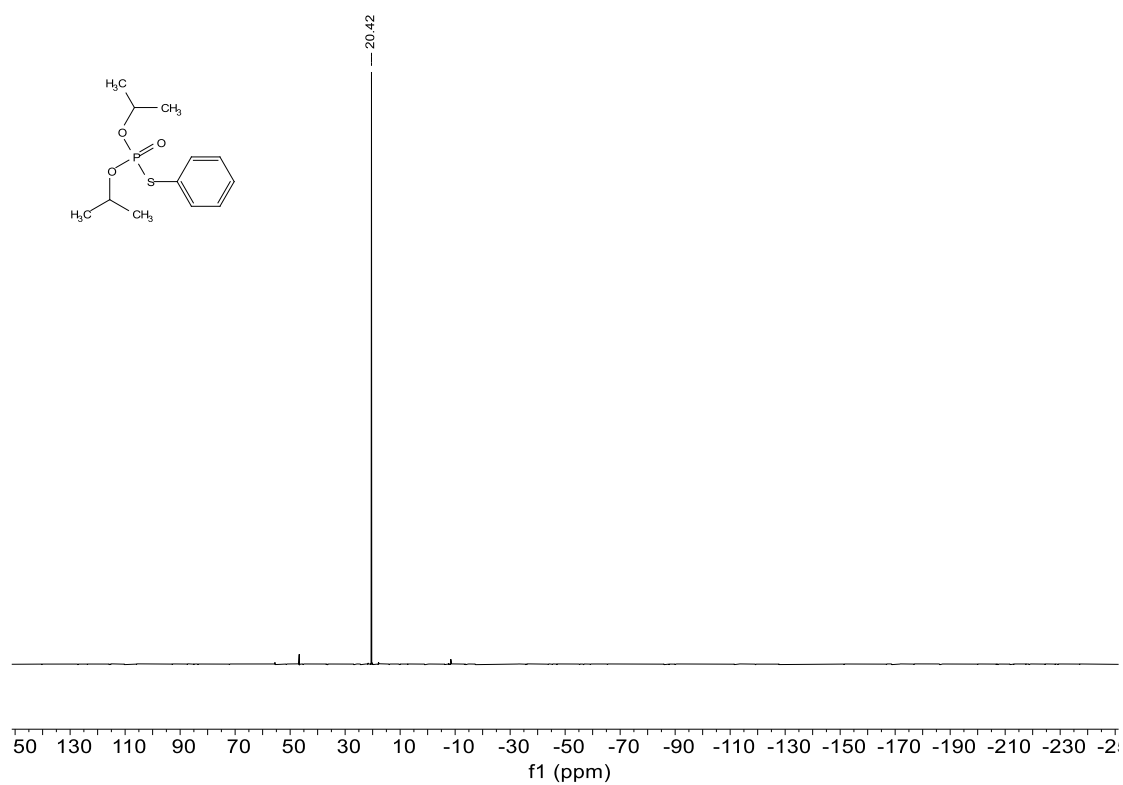

$^{31}\text{P}\{^1\text{H}\}$  NMR (202 MHz,  $\text{CDCl}_3$ ) spectrum of compound 51

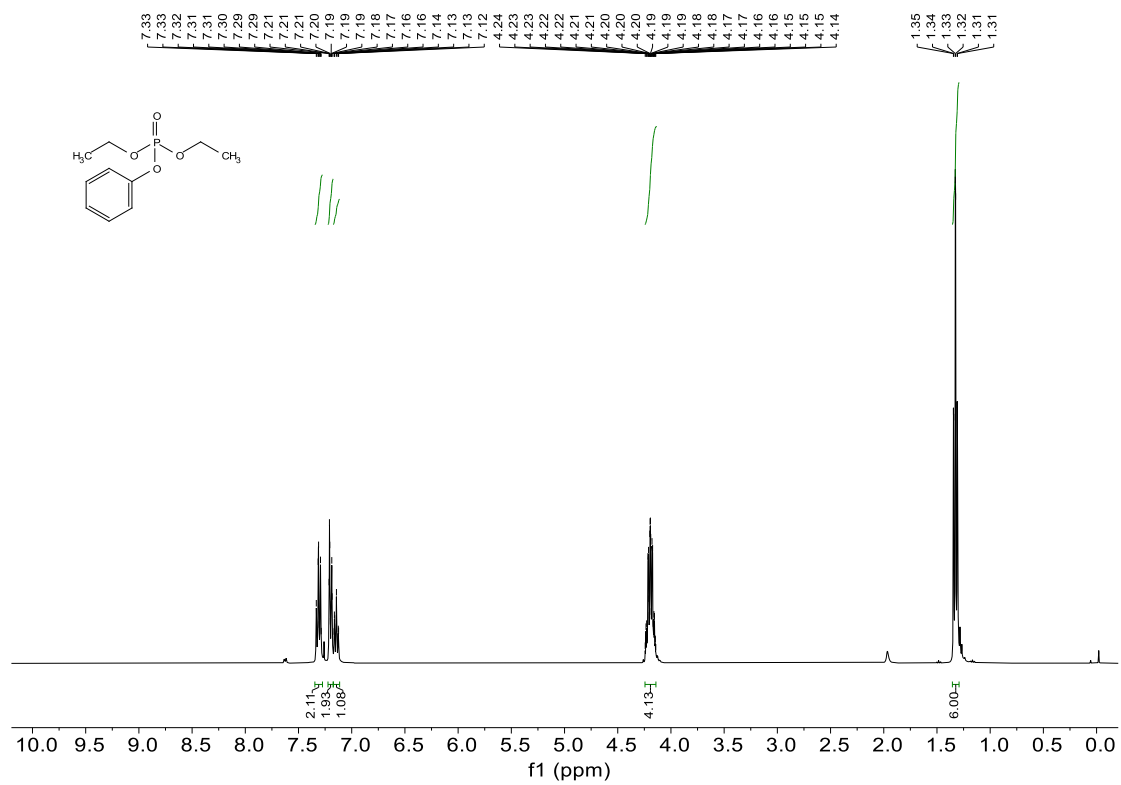

<sup>1</sup>H NMR (600 MHz, CDCl<sub>3</sub>) spectrum of compound 7a

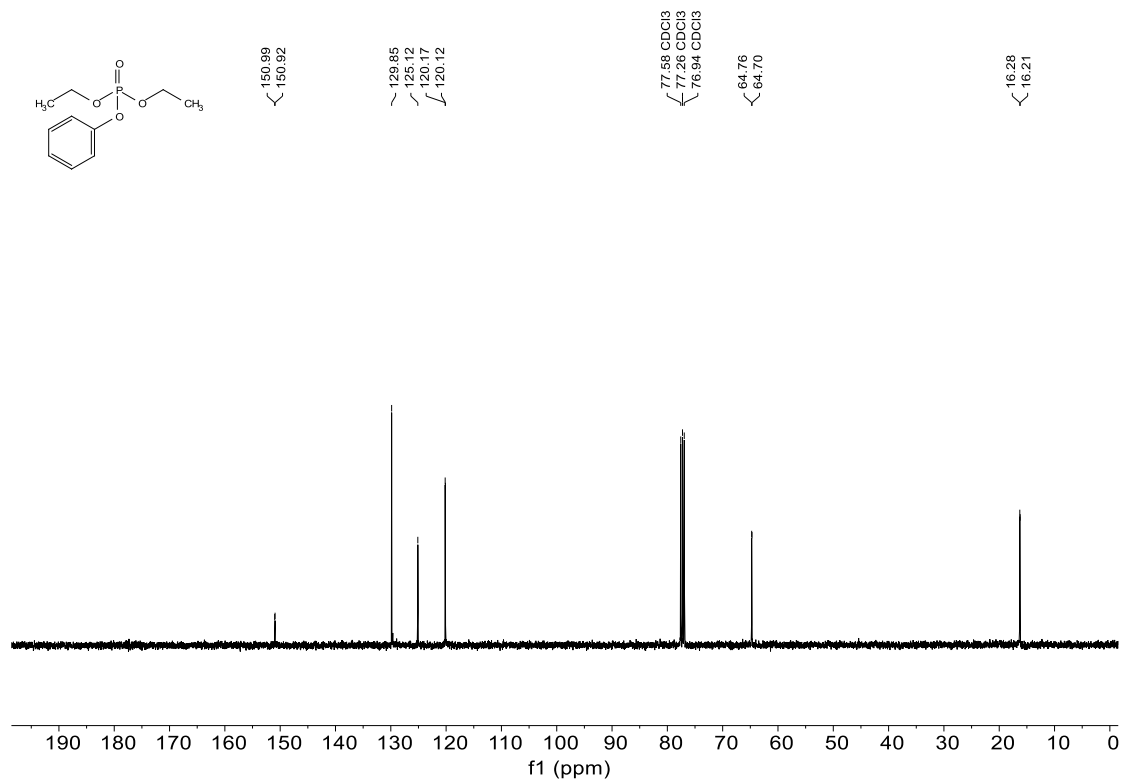

<sup>13</sup>C{<sup>1</sup>H} NMR (150 MHz, CDCl<sub>3</sub>) spectrum of compound 7a



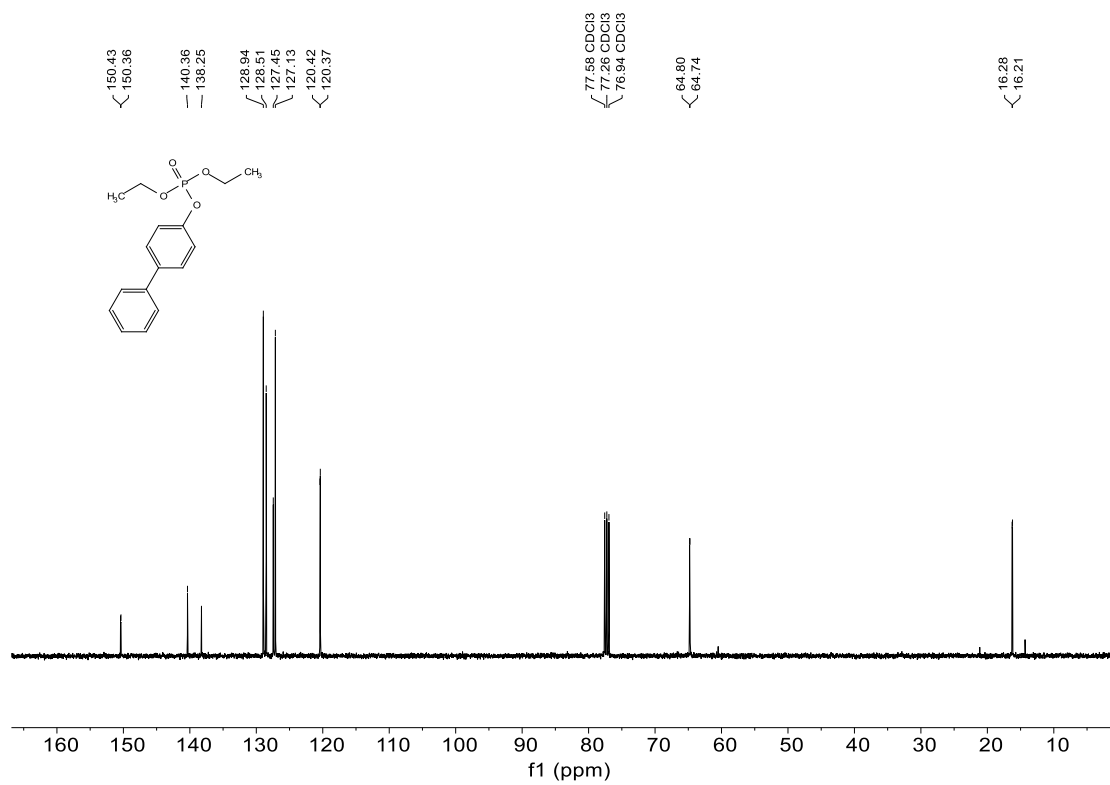

$^{13}\text{C}\{^1\text{H}\}$  NMR (126 MHz,  $\text{CDCl}_3$ ) spectrum of compound **7b**

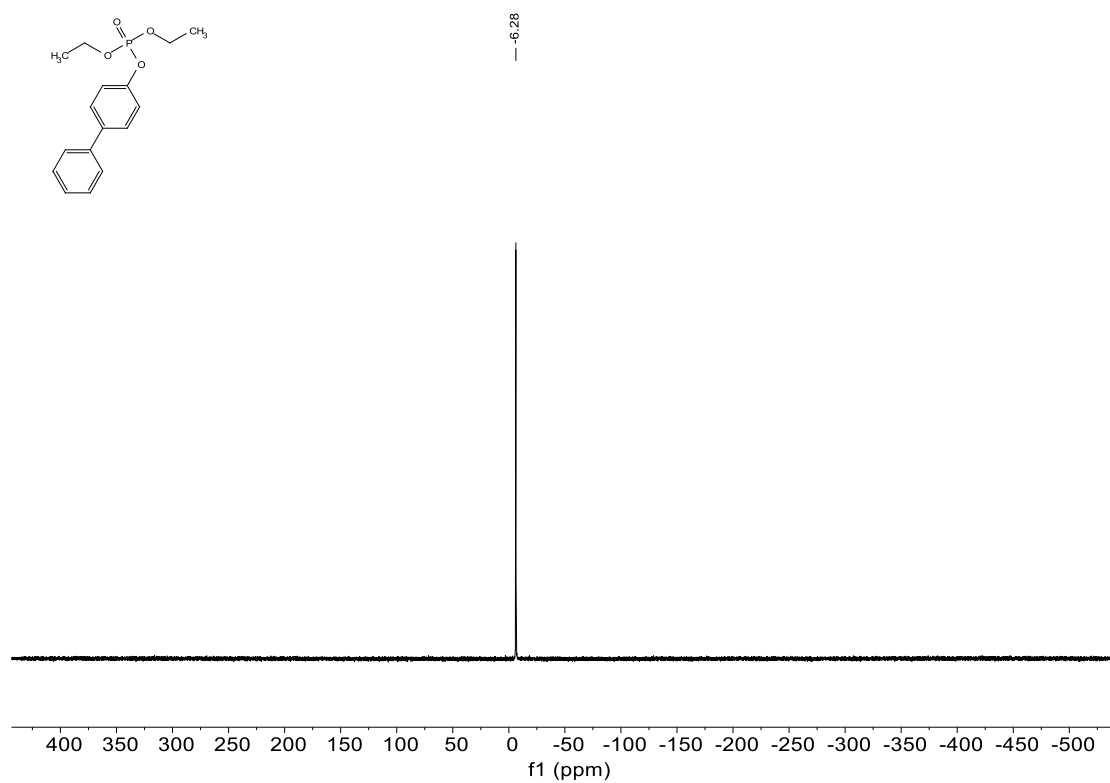

$^{31}\text{P}\{^1\text{H}\}$  NMR (202 MHz,  $\text{CDCl}_3$ ) spectrum of compound **7b**

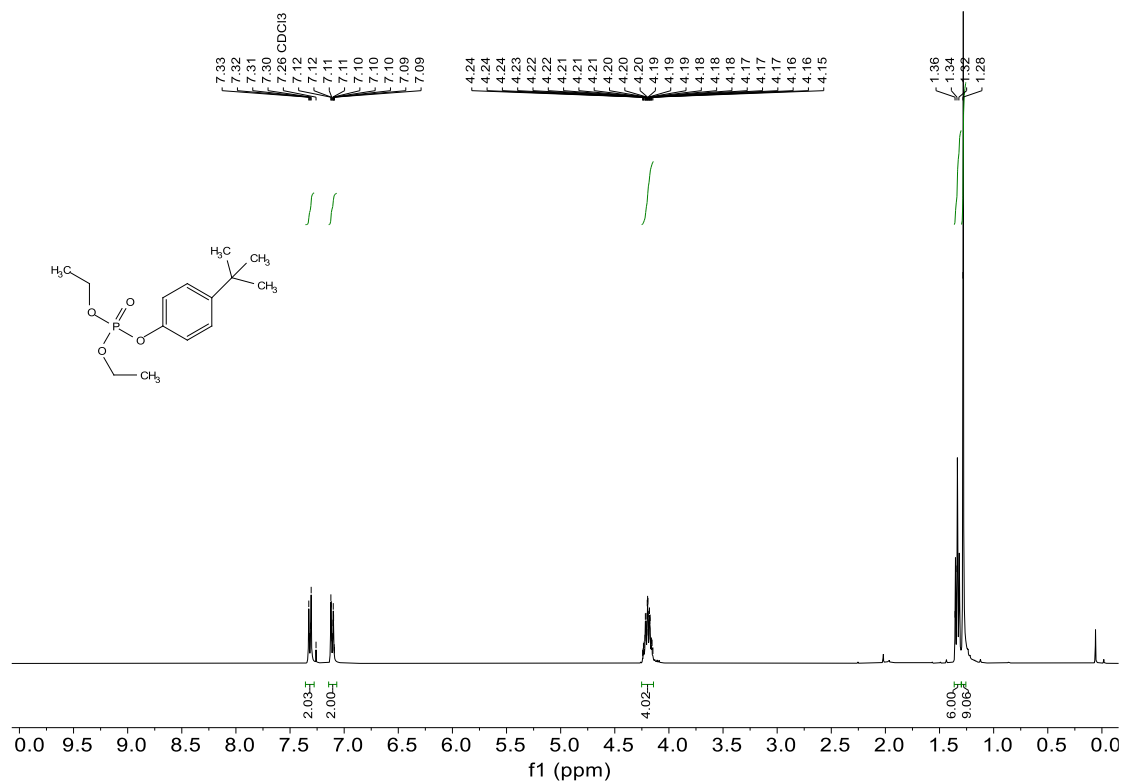

$^1\text{H NMR}$  (500 MHz,  $\text{CDCl}_3$ ) spectrum of compound 7c

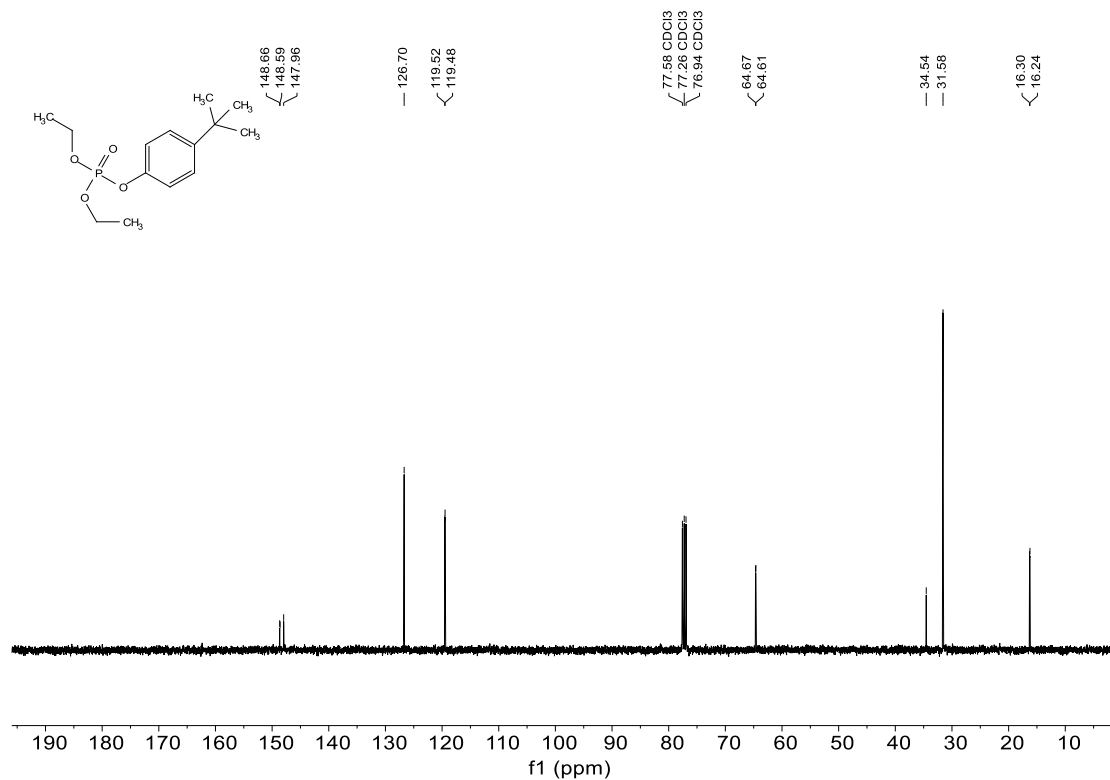

$^{13}\text{C}\{^1\text{H}\}$  NMR (126 MHz,  $\text{CDCl}_3$ ) spectrum of compound 7c

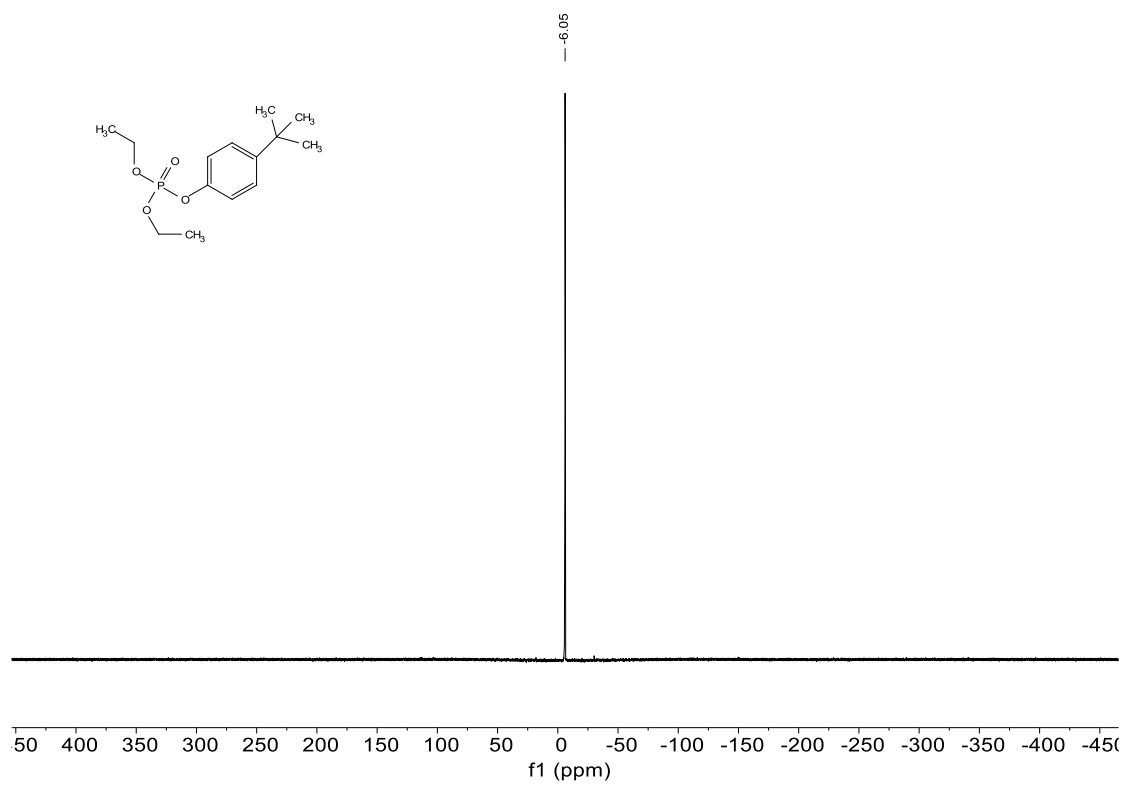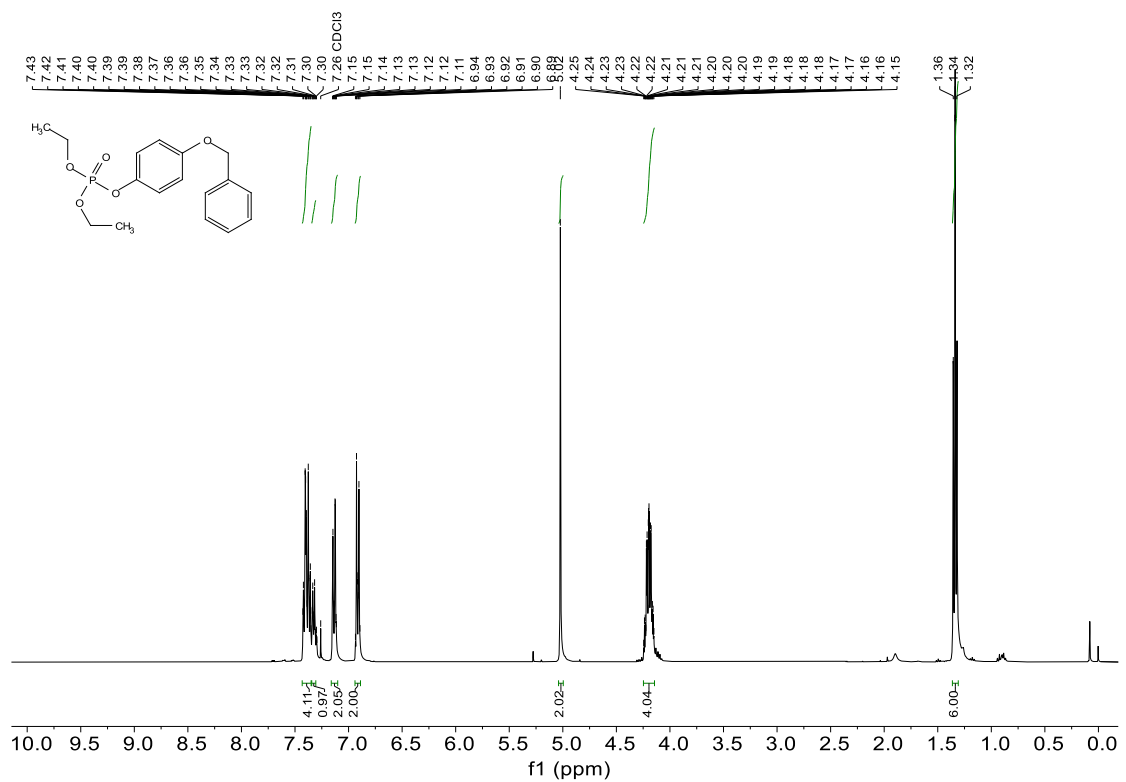



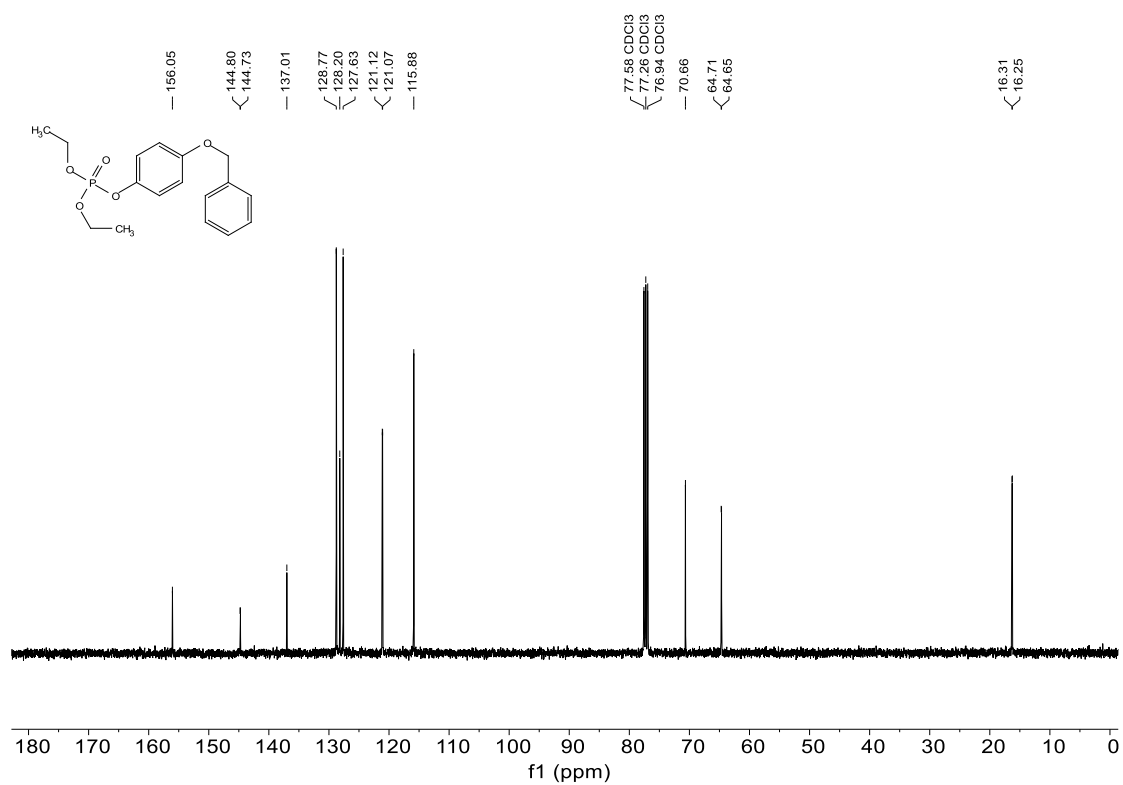

$^{13}\text{C}\{^1\text{H}\}$  NMR (126 MHz,  $\text{CDCl}_3$ ) spectrum of compound **7d**

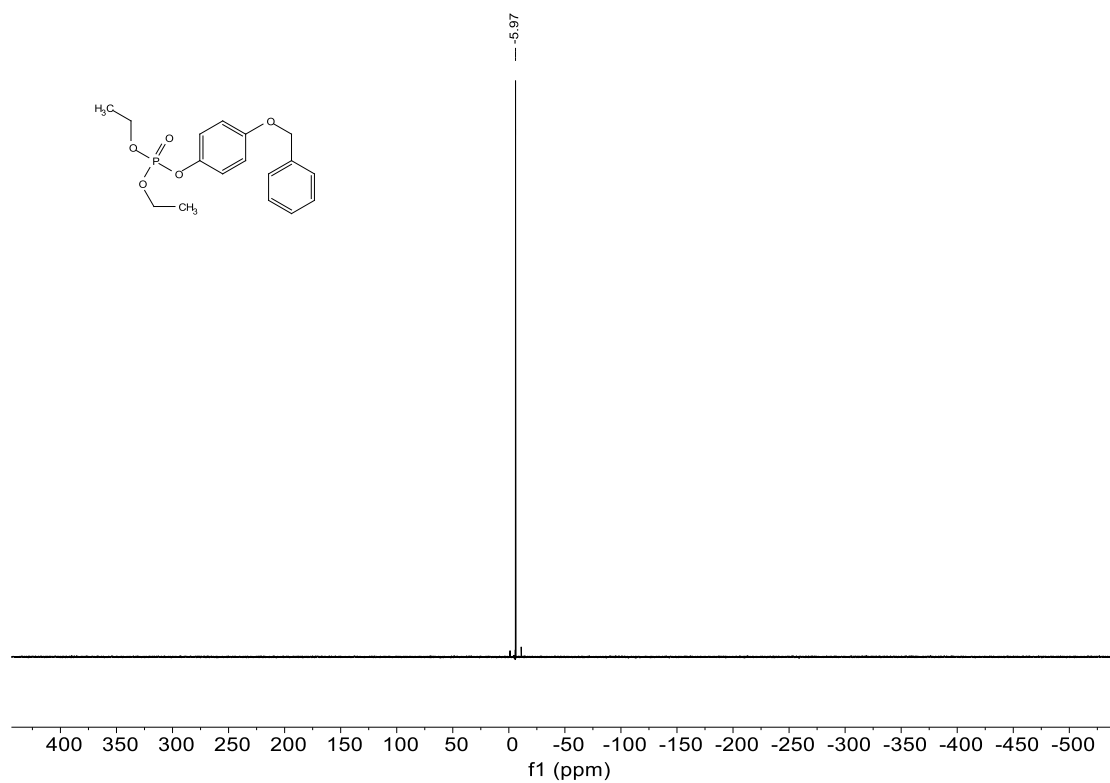

$^{31}\text{P}\{^1\text{H}\}$  NMR (202 MHz,  $\text{CDCl}_3$ ) spectrum of compound **7d**

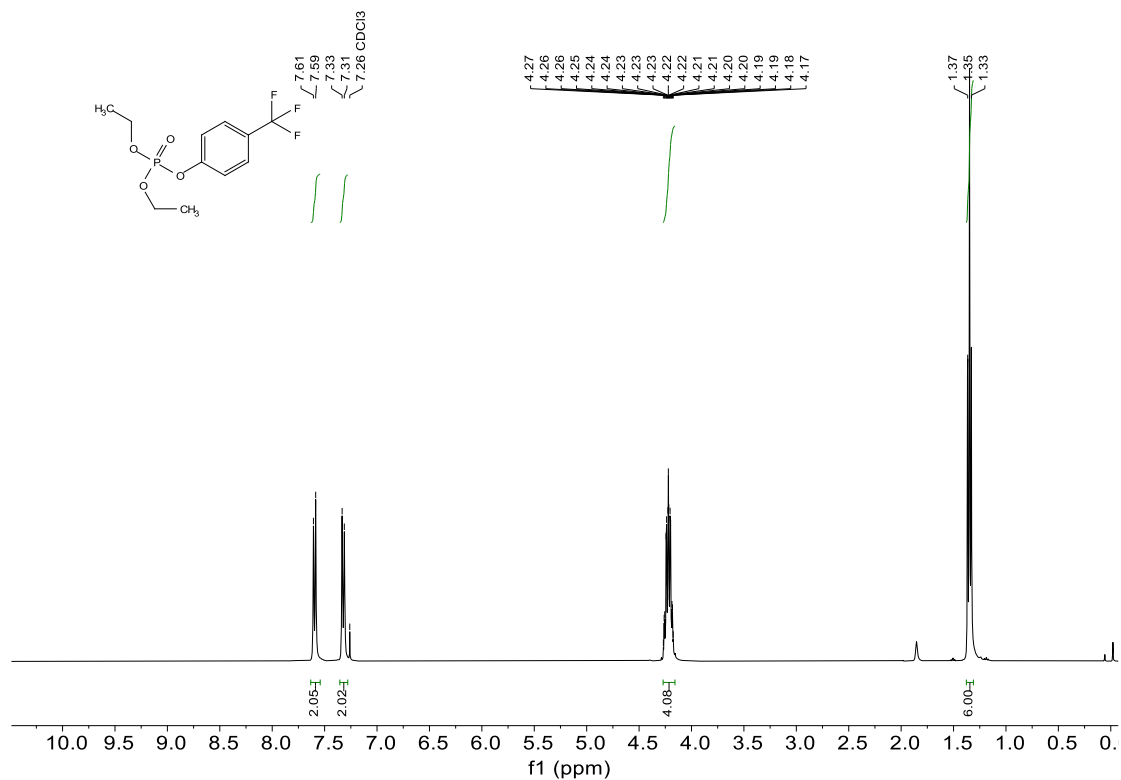

<sup>1</sup>H NMR (500 MHz, CDCl<sub>3</sub>) spectrum of compound 7e

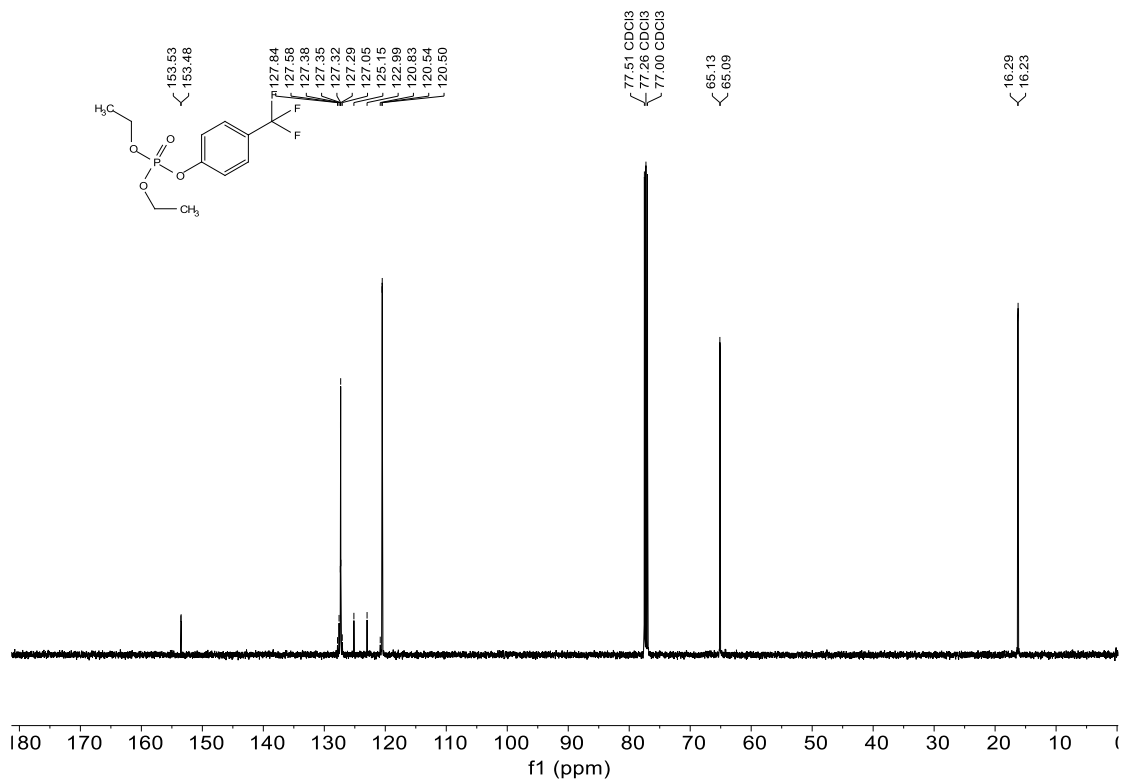

<sup>13</sup>C {<sup>1</sup>H} NMR (126 MHz, CDCl<sub>3</sub>) spectrum of compound 7e

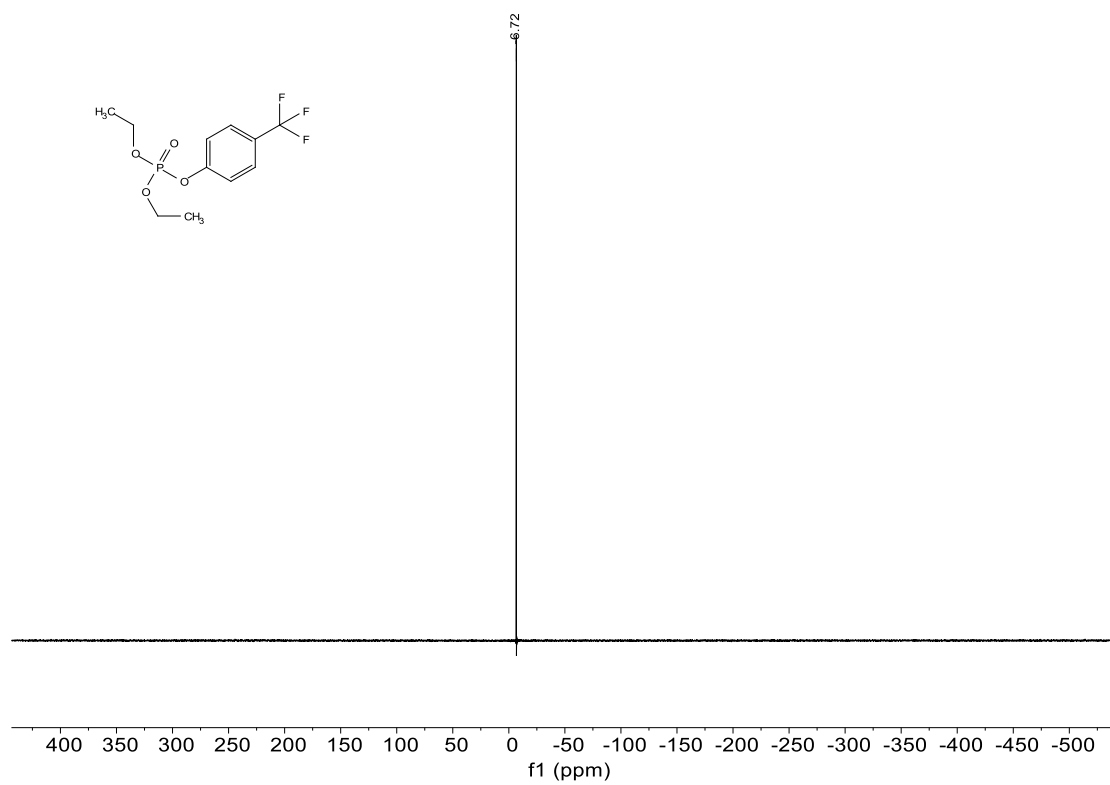

$^{31}\text{P}\{^1\text{H}\}$  NMR (202 MHz,  $\text{CDCl}_3$ ) spectrum of compound 7e

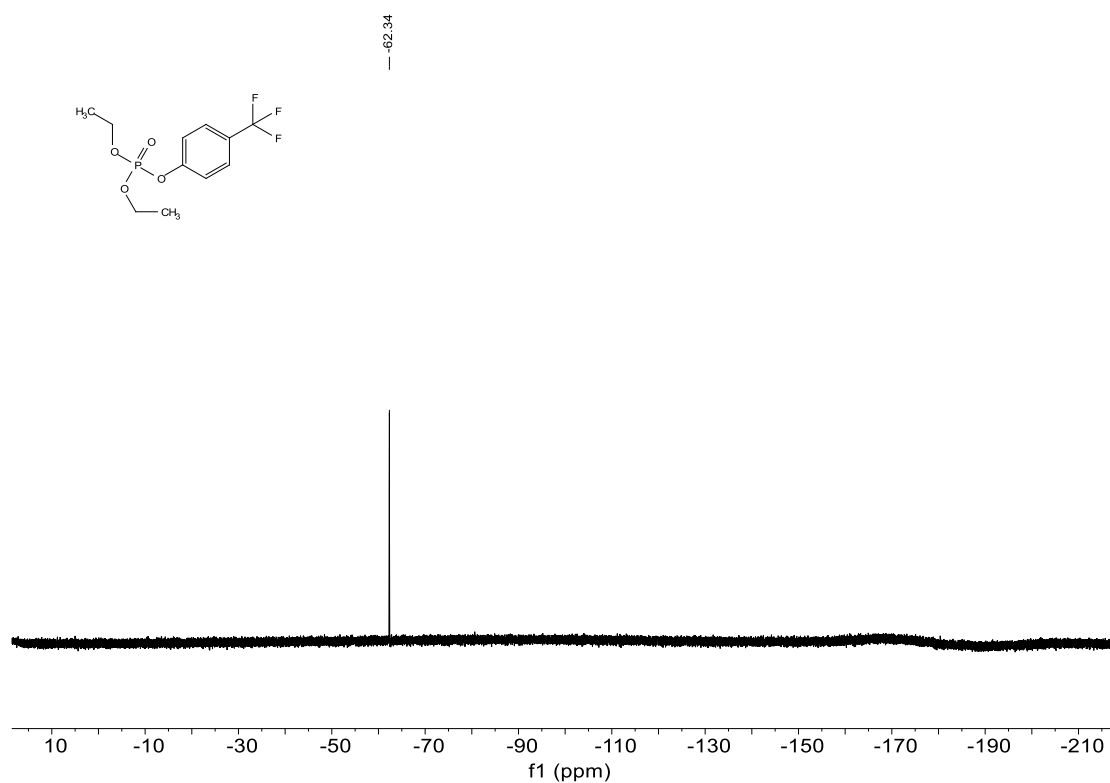

$^{19}\text{F}\{^1\text{H}\}$  NMR (377 MHz,  $\text{CDCl}_3$ ) spectrum of compound 7e

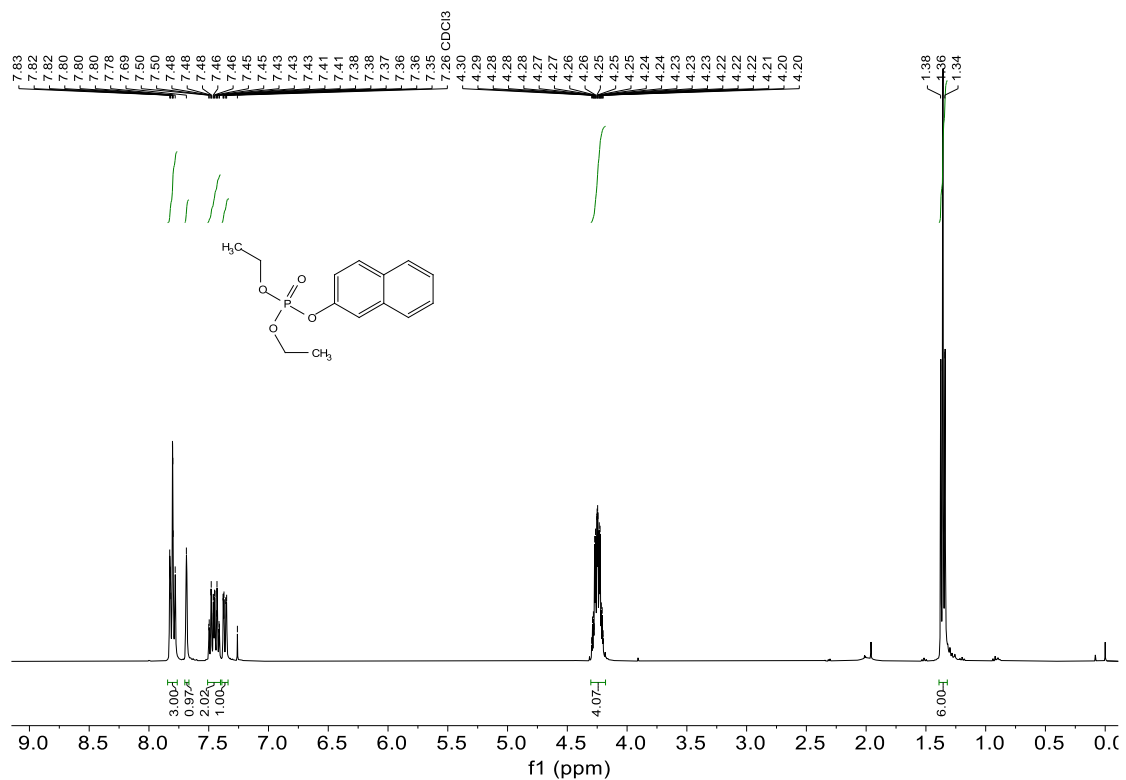

$^1\text{H NMR}$  (400 MHz,  $\text{CDCl}_3$ ) spectrum of compound 7f

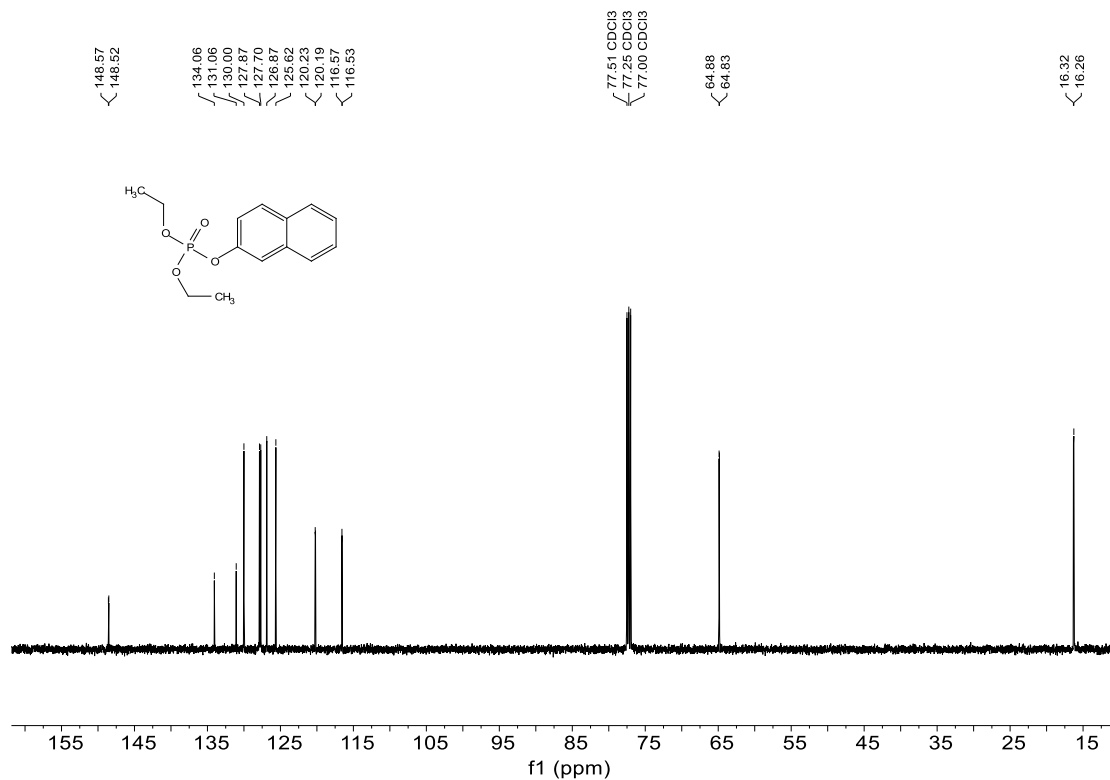

$^{13}\text{C}\{^1\text{H}\}$  NMR (126 MHz,  $\text{CDCl}_3$ ) spectrum of compound 7f

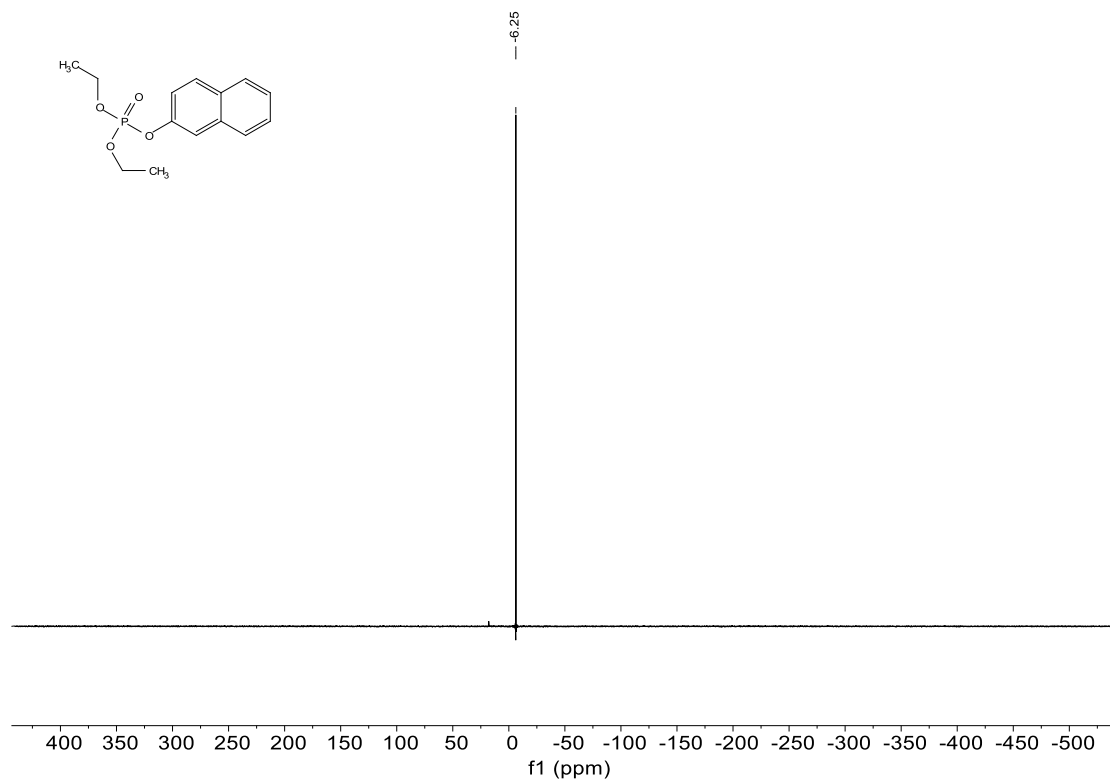

$^{31}\text{P}\{^1\text{H}\}$  NMR (202 MHz,  $\text{CDCl}_3$ ) spectrum of compound **7f**

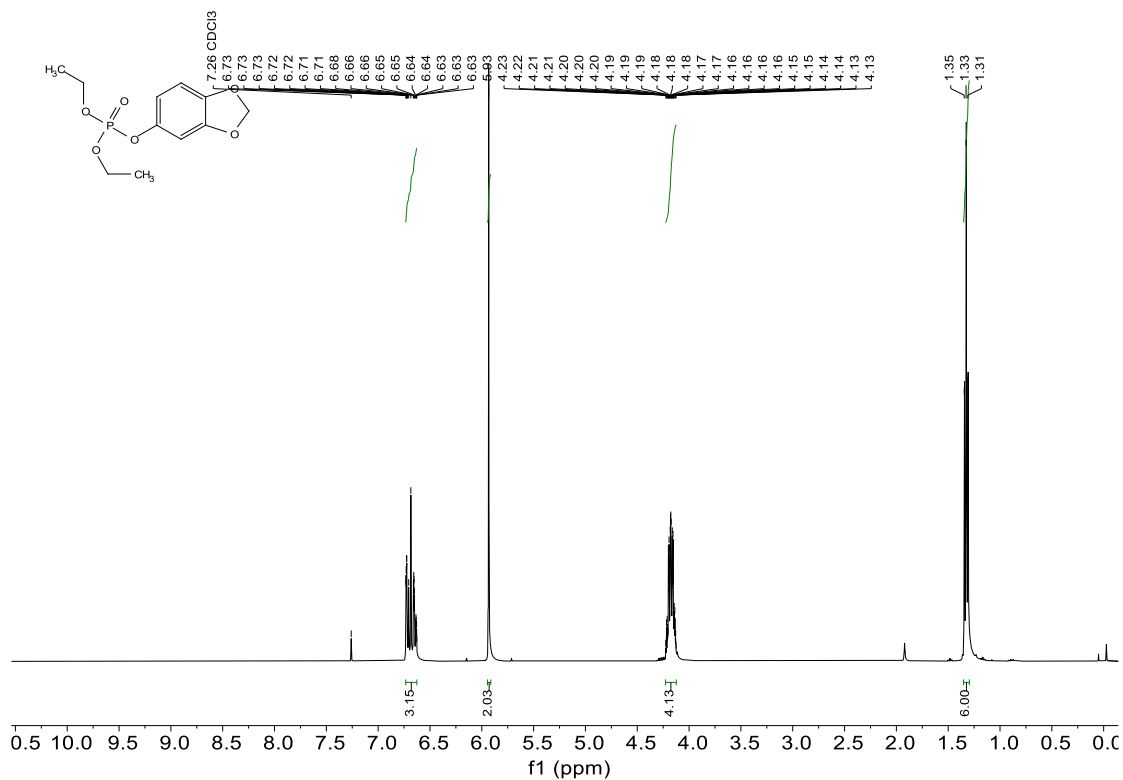

$^1\text{H}$  NMR (400 MHz,  $\text{CDCl}_3$ ) spectrum of compound **7g**

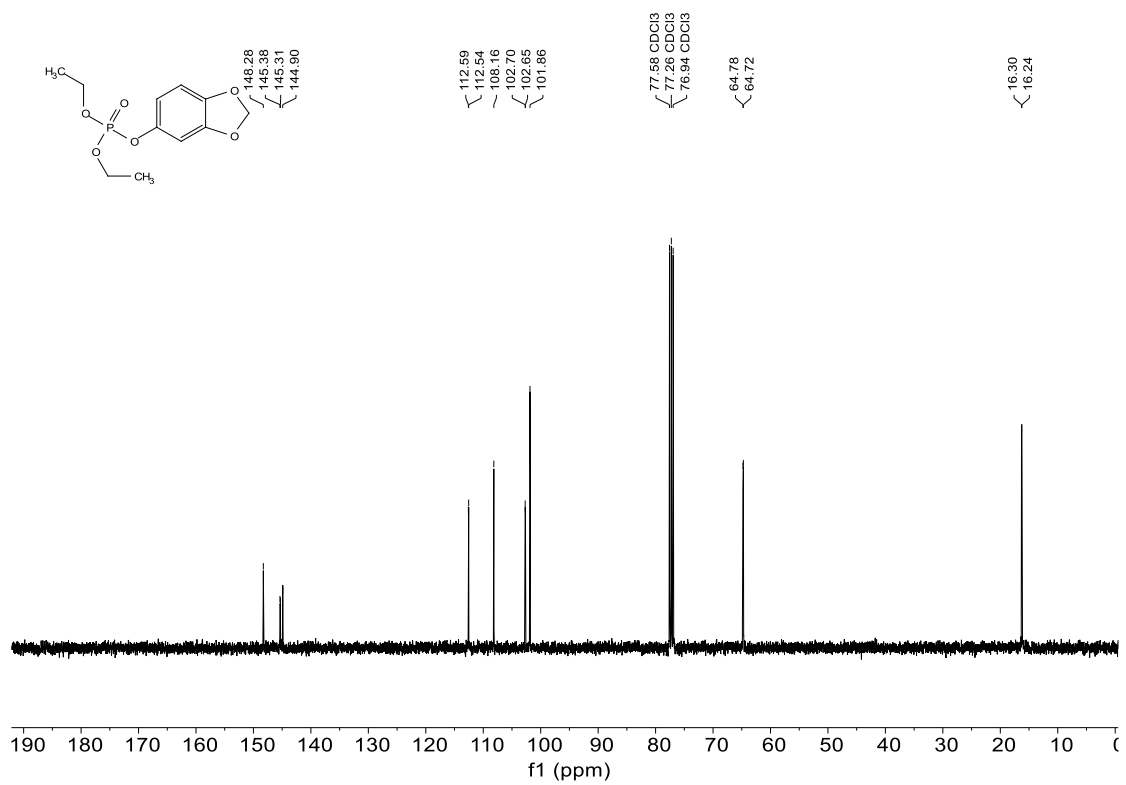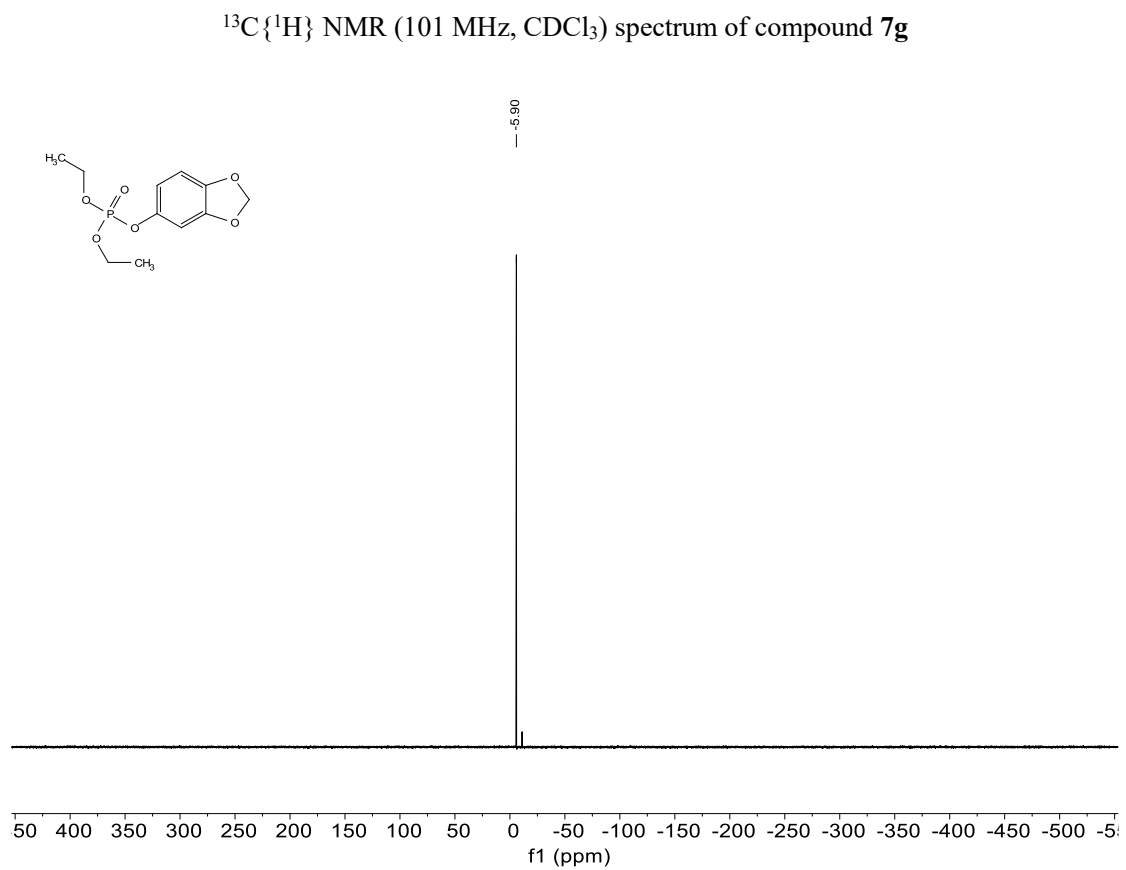

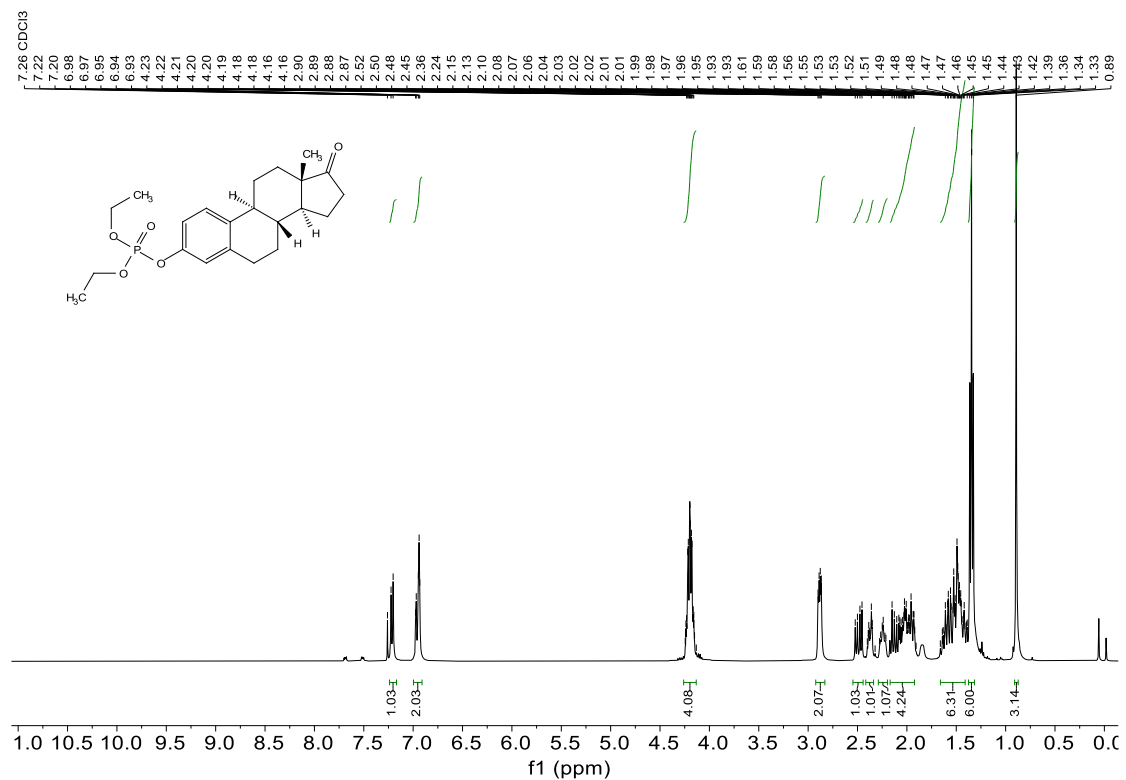

<sup>1</sup>H NMR (400 MHz, CDCl<sub>3</sub>) spectrum of compound **7h**

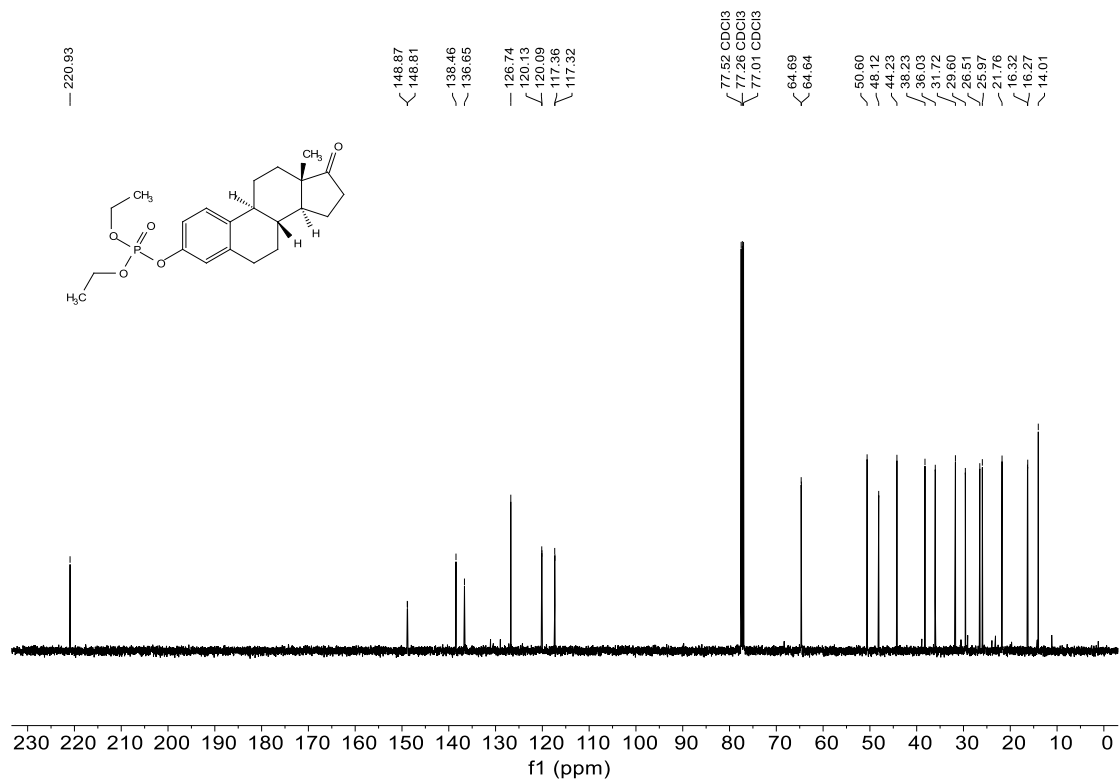

<sup>13</sup>C{<sup>1</sup>H} NMR (101MHz, CDCl<sub>3</sub>) spectrum of compound **7h**





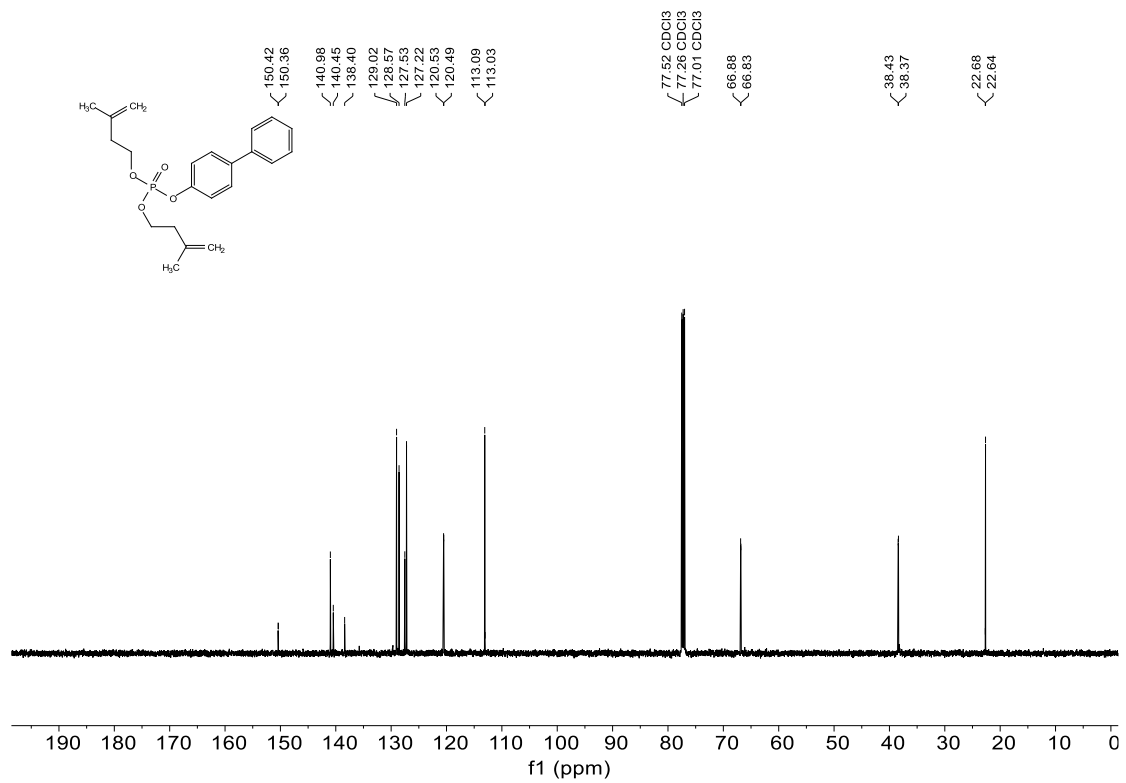

$^{13}\text{C}\{^1\text{H}\}$  NMR (101 MHz,  $\text{CDCl}_3$ ) spectrum of compound 7i

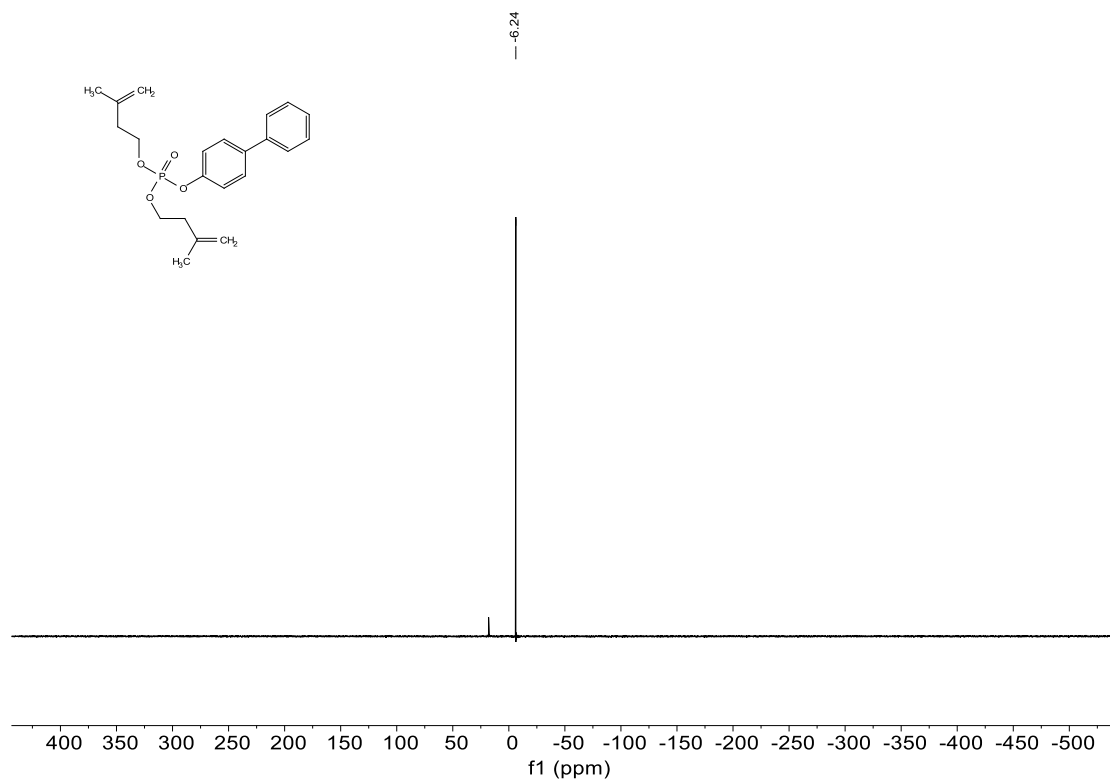

$^{31}\text{P}\{^1\text{H}\}$  NMR (202 MHz,  $\text{CDCl}_3$ ) spectrum of compound 7i

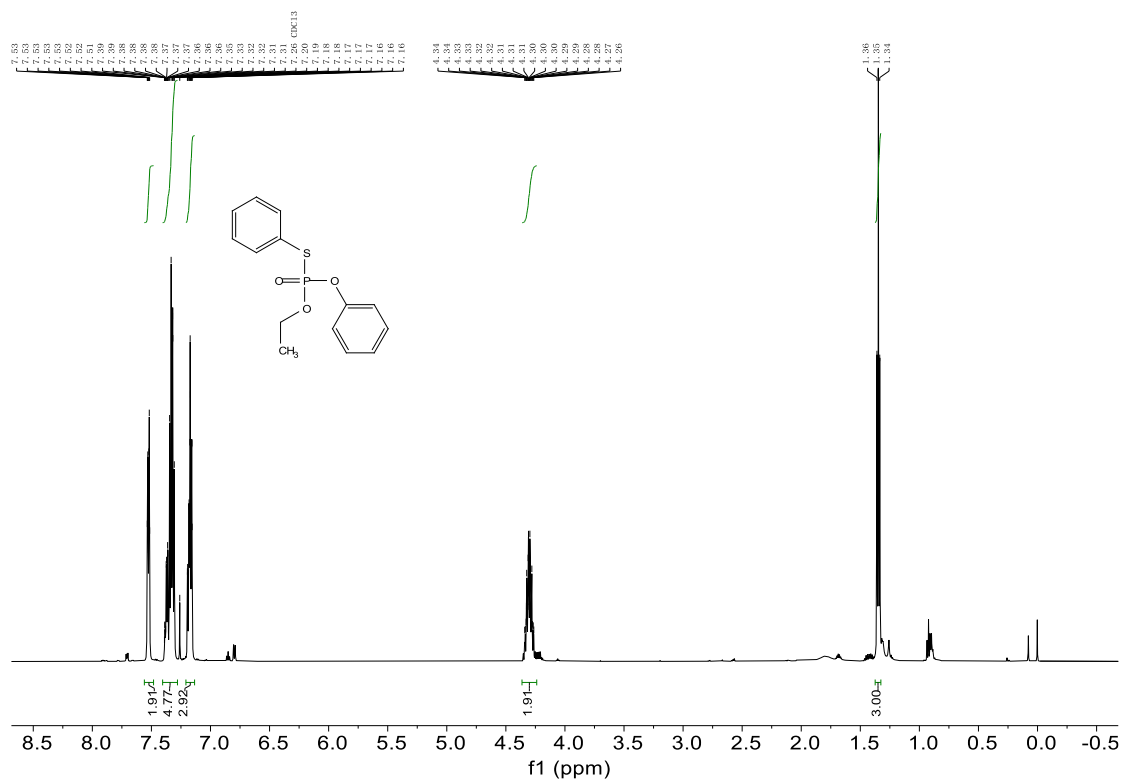

<sup>1</sup>H NMR (600 MHz, CDCl<sub>3</sub>) spectrum of compound **8a**

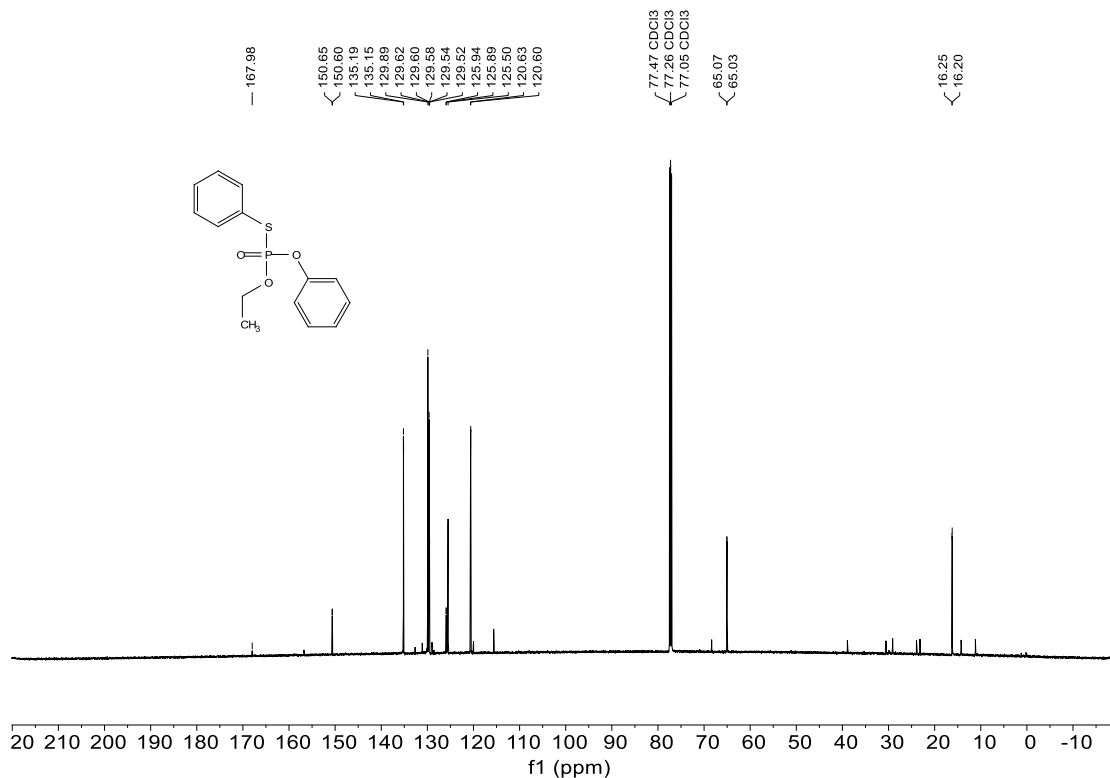

<sup>13</sup>C {<sup>1</sup>H} NMR (150 MHz, CDCl<sub>3</sub>) spectrum of compound **8a**

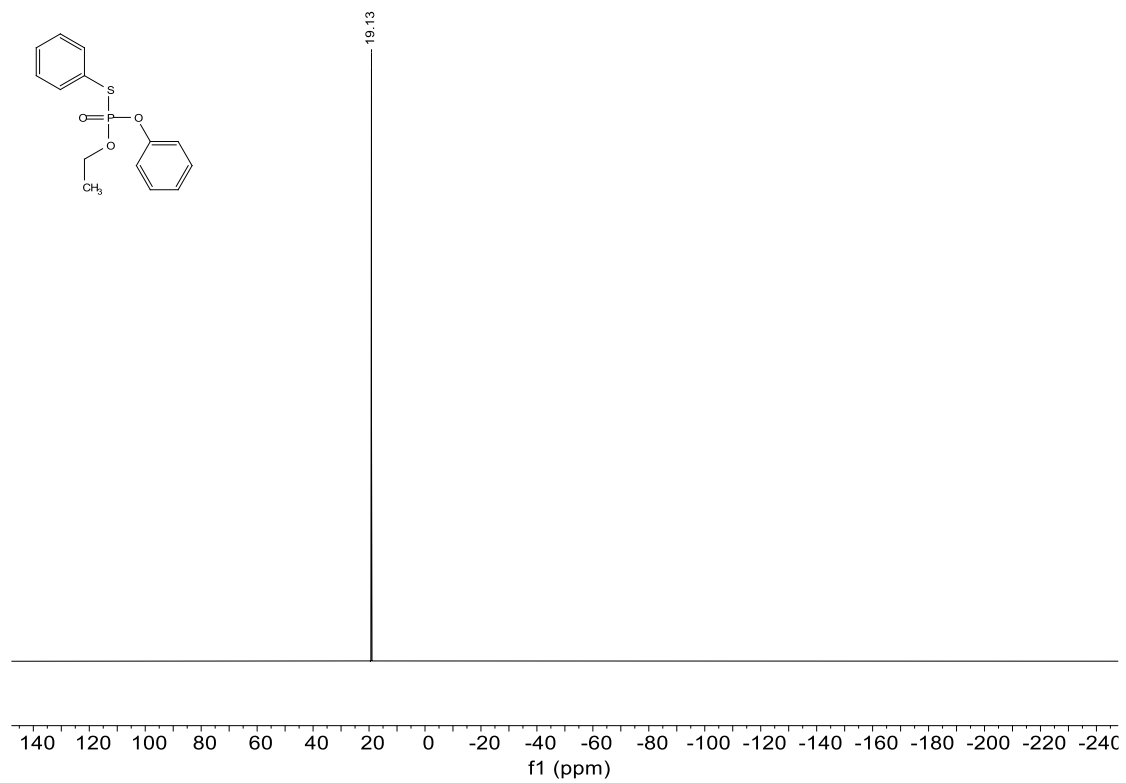

$^{31}\text{P}\{^1\text{H}\}$  NMR (242 MHz,  $\text{CDCl}_3$ ) spectrum of compound **8a**

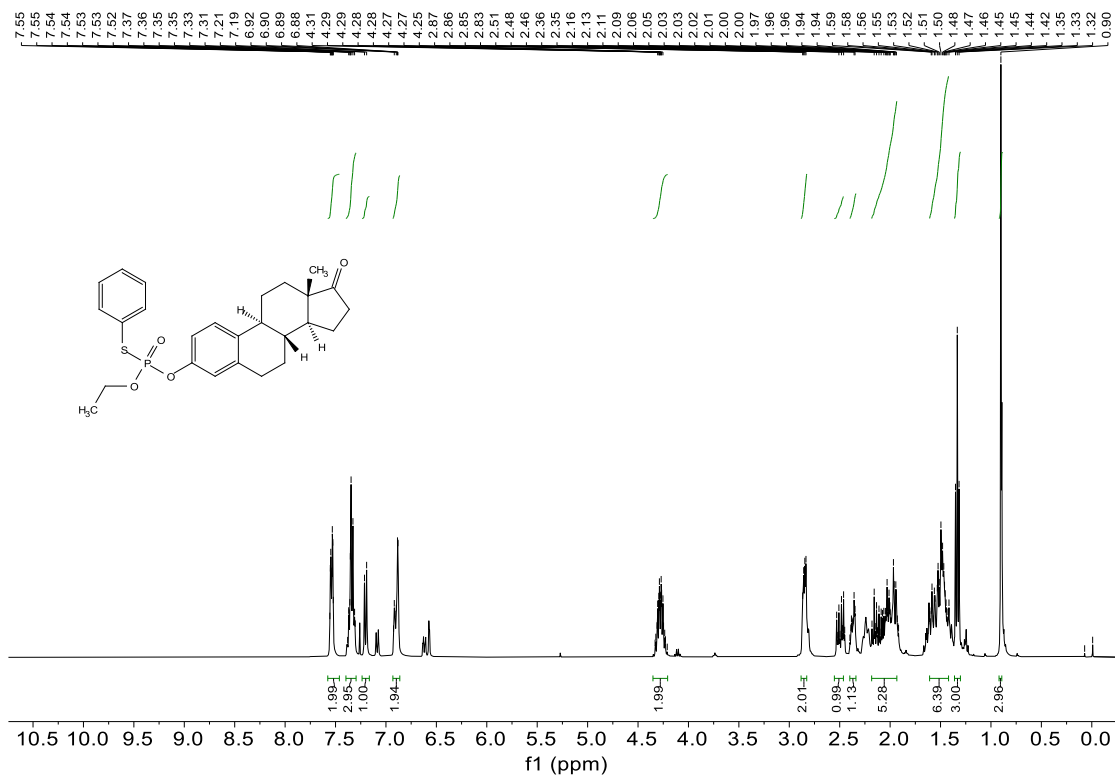

$^1\text{H}$  NMR (400 MHz,  $\text{CDCl}_3$ ) spectrum of compound **8b**

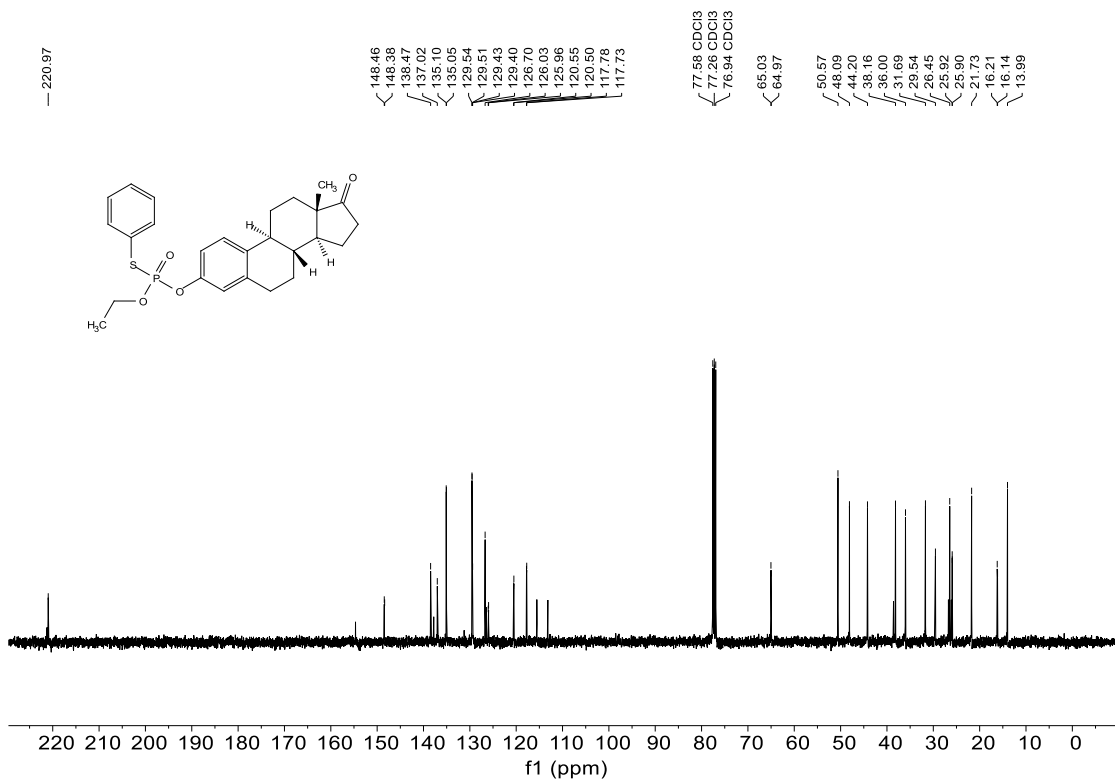

<sup>13</sup>C{<sup>1</sup>H} NMR (101 MHz, CDCl<sub>3</sub>) spectrum of compound **8b**

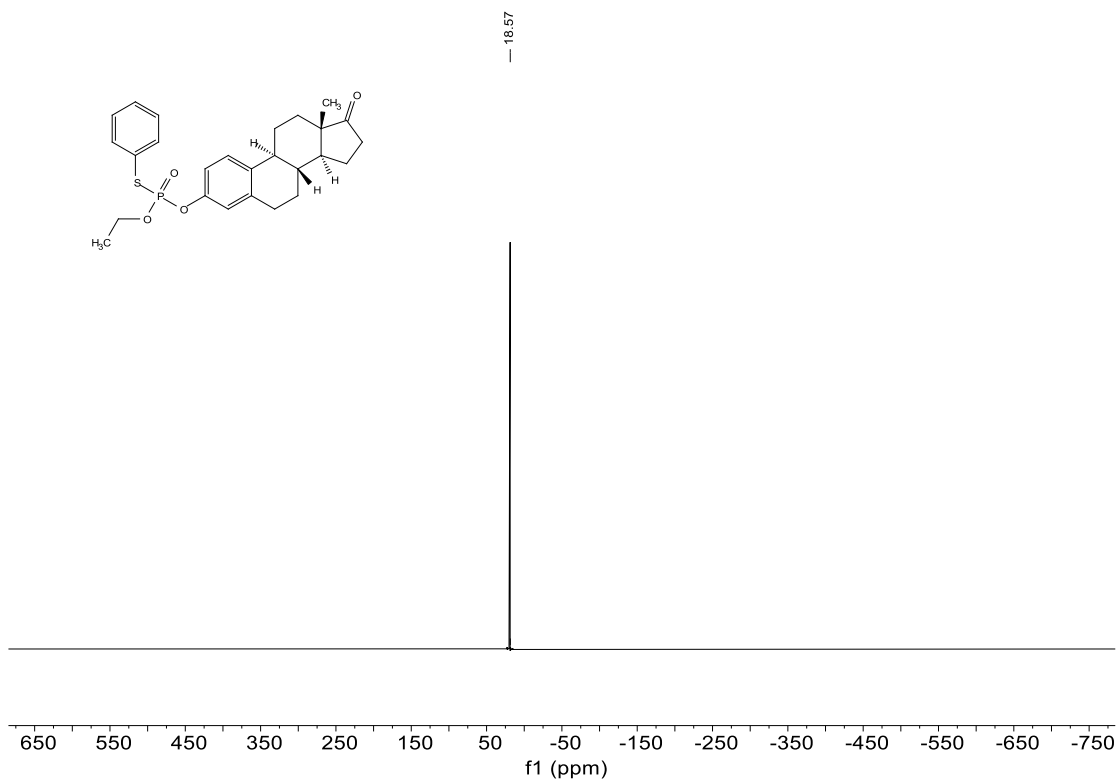

<sup>31</sup>P{<sup>1</sup>H} NMR (202 MHz, CDCl<sub>3</sub>) spectrum of compound **8b**

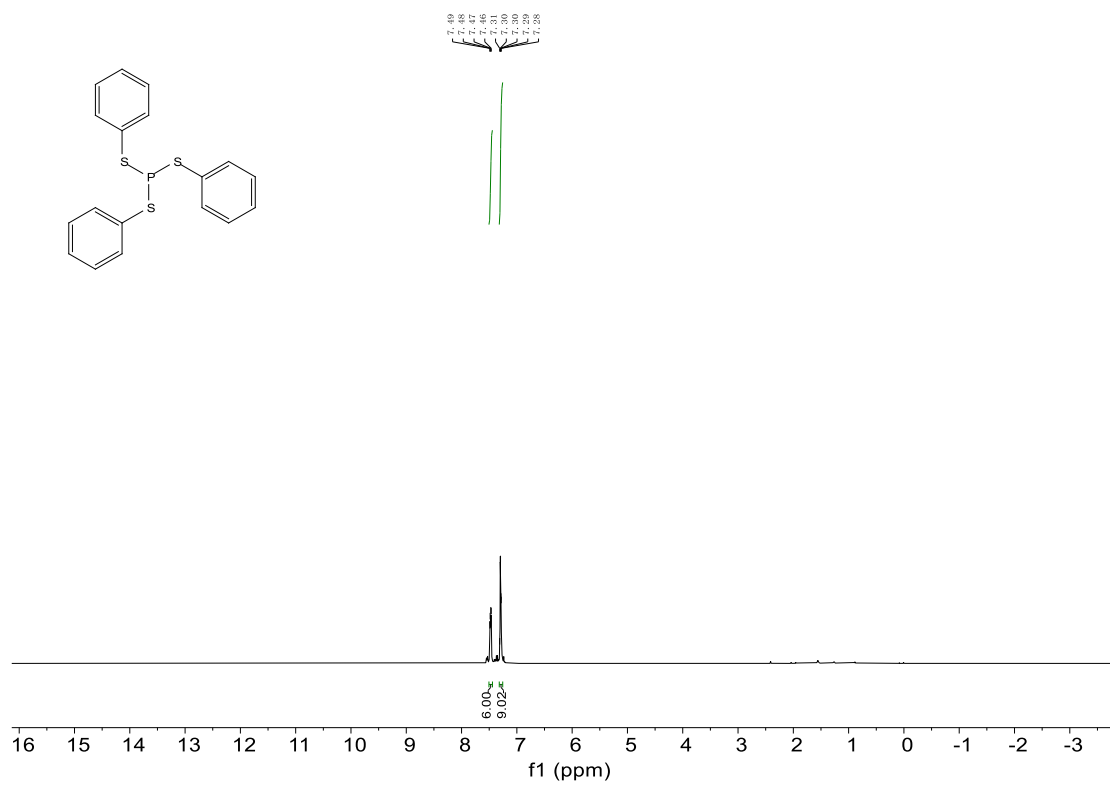

$^1\text{H NMR}$  (500 MHz,  $\text{CDCl}_3$ ) spectrum of compound 9

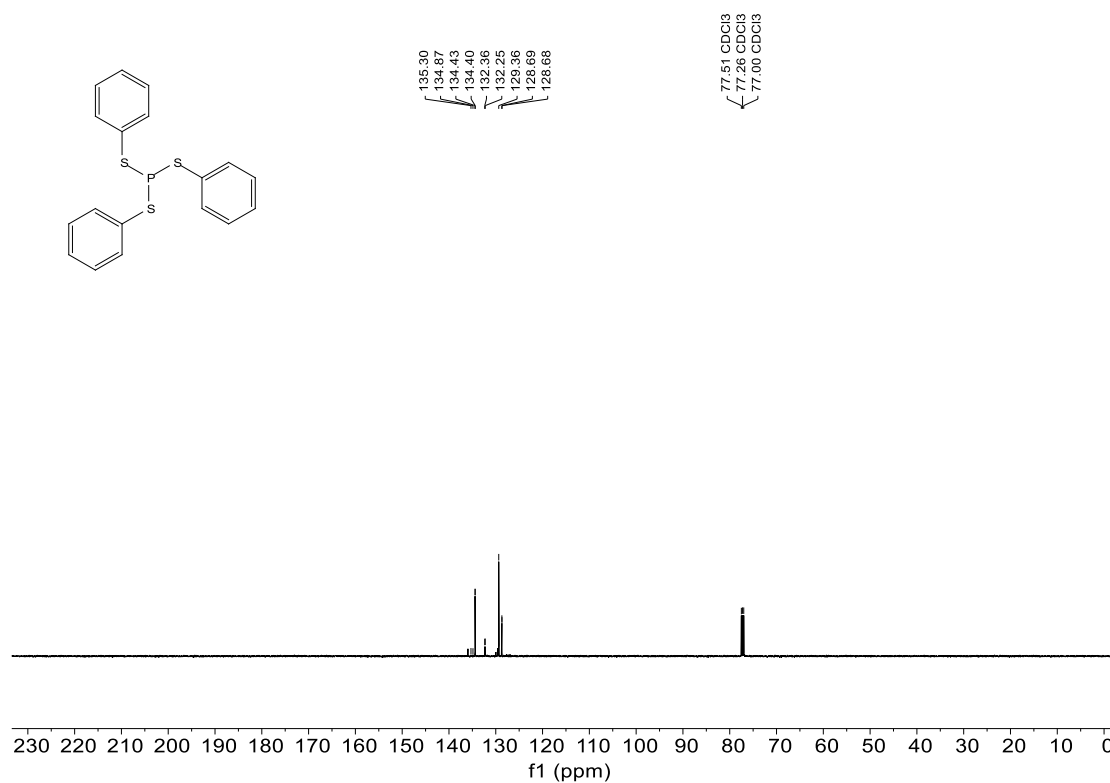

$^{13}\text{C}\{^1\text{H}\}$  NMR (126 MHz,  $\text{CDCl}_3$ ) spectrum of compound 9

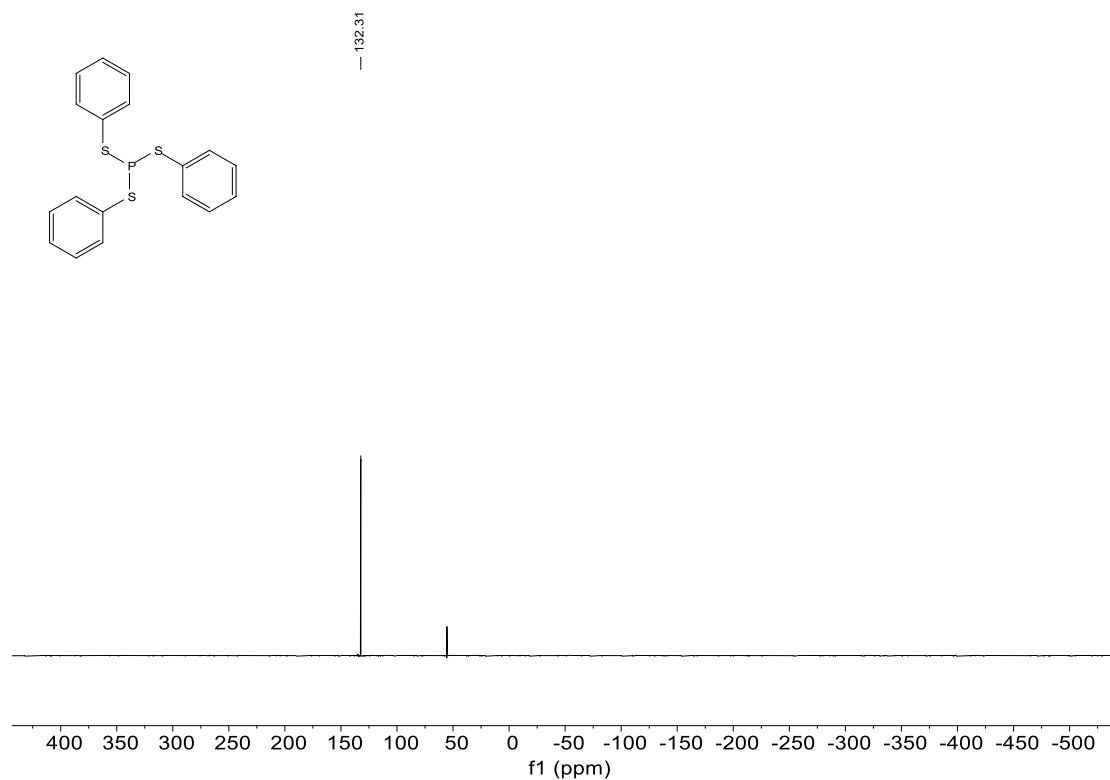

$^{31}\text{P}\{^1\text{H}\}$  NMR (202 MHz,  $\text{CDCl}_3$ ) spectrum of compound **9**

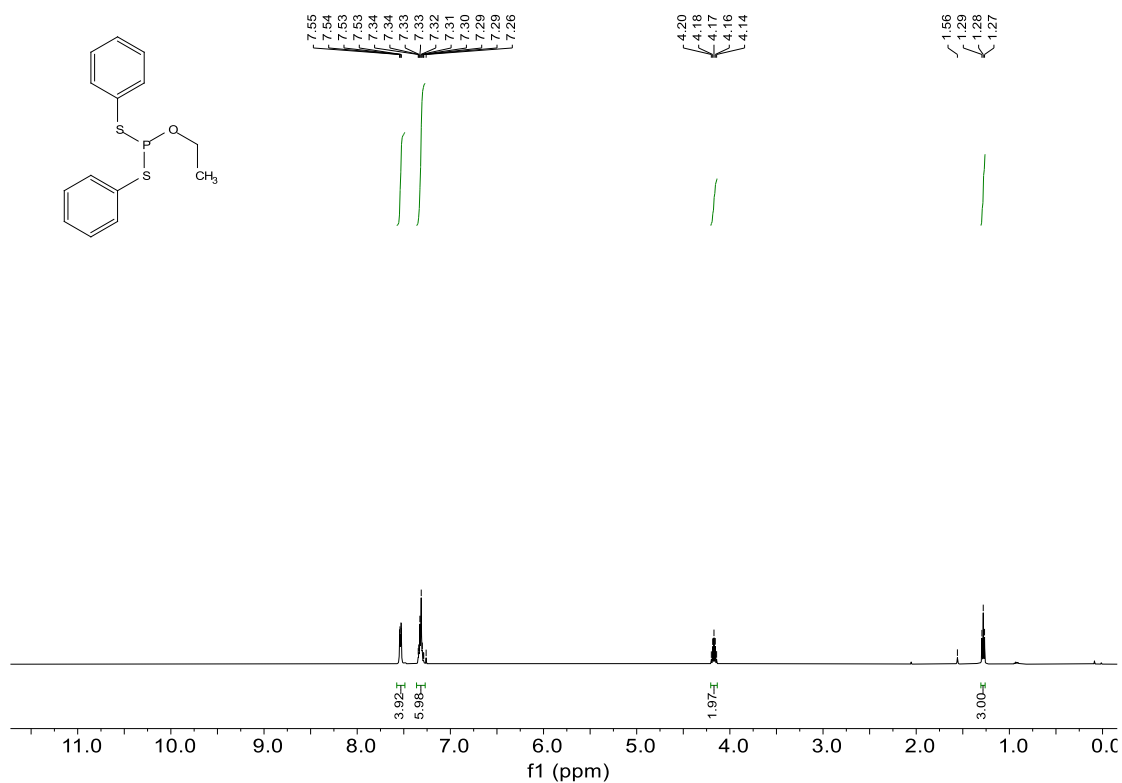

$^1\text{H}$  NMR (500 MHz,  $\text{CDCl}_3$ ) spectrum of compound **10**

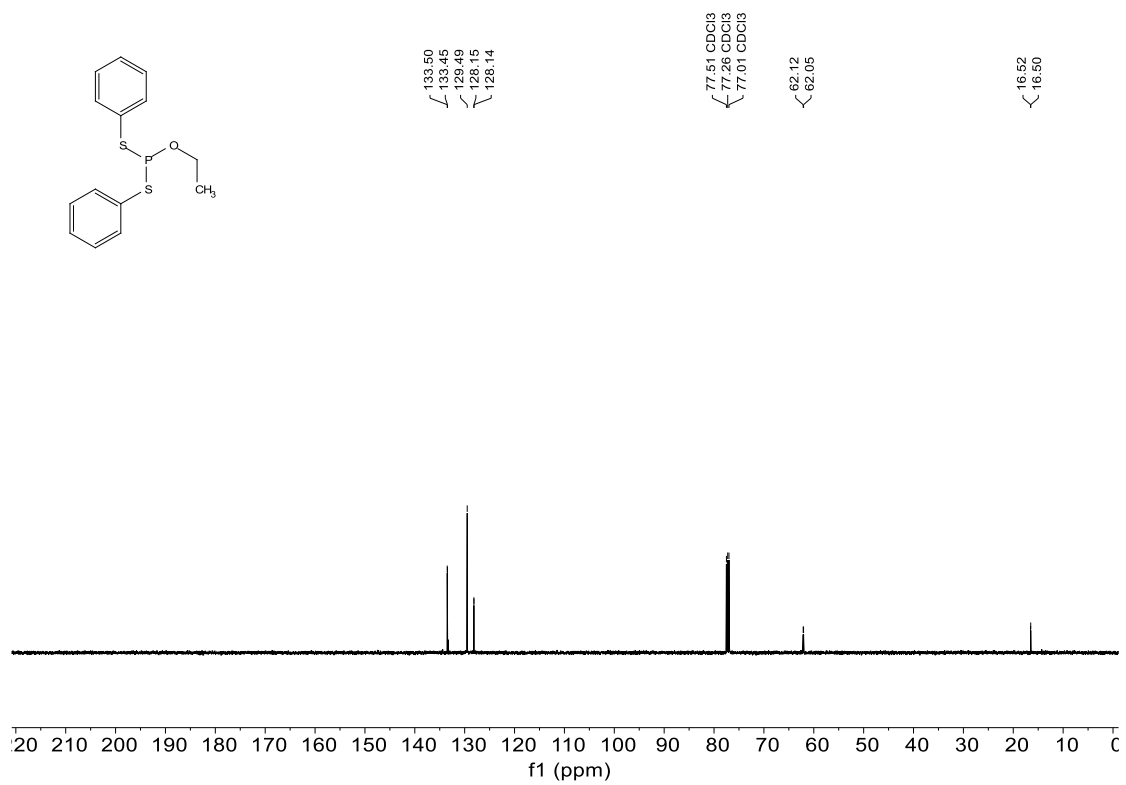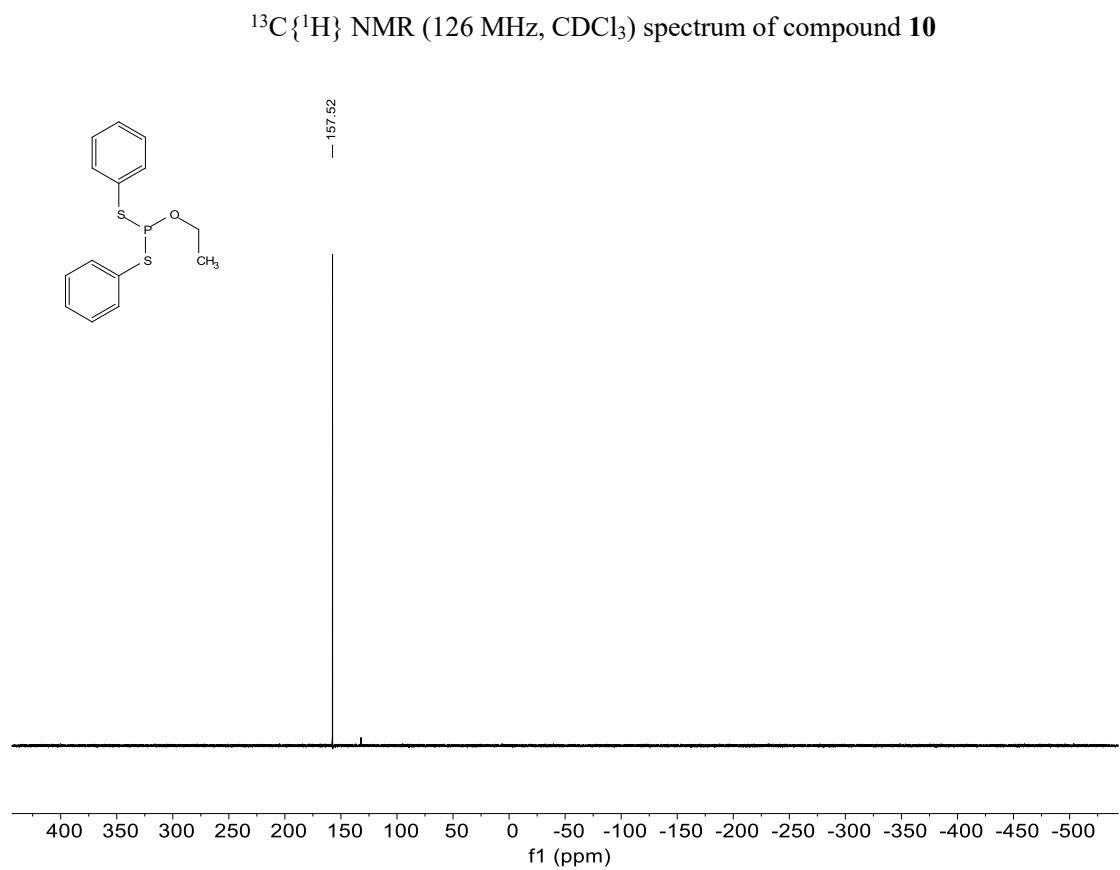

Supplement: d3gc03583b1.pdf [file d3gc03583b1.pdf]
